# Supplementary material for: Targeting Oncogenic Pathways in the Era of Personalized Oncology: A Systemic Analysis Reveals Highly Mutated Signaling Pathways in Cancer Patients and Potential Therapeutic Targets
Source: MDPI journal article supplement (doi:10.3390/cancers14030664), 2022-01-28
Supplement: s1 [file s1]

Program that isolates only the Literature reviewed genes from a matrix containing both Literature reviewed and Computationally predicted genes involved in ubiquitylation process.

```
import pandas as pd

cd ~\python programming\2

ubq = pd.read_csv("ubq.csv")

# In ubq.csv there are Literature reviewed, as well as Computationally predicted
# genes implicated in ubiquitylation process. We want to take into account only
# the Literature reviewed ones.

ubq = ubq[ubq.Validation_status == "Literature reviewed"]

ubq_genes = list(ubq.Gene)
```

Program that creates a table containing driver cancer genes from 30 cancer related pathways, the pathway they belong to and the percent of tumor samples (out of 10439 samples from 32 cancer types of PanCancerAtlas projects) where these genes are found mutated.

```
cd ~\python programming\2

import pandas as pd

genes = pd.read_csv("gene_mutation_frequencies.csv")

i = -1
for freq in genes.Frequency:
    i += 1
    genes.Frequency[i] = float(freq.replace(",", "."))

# Mitogenic pathways

RTK_RAS = "MAP2K2    MAPK1    MAP2K1    RAF1 BRAF ARAF NRAS HRAS
          KRAS RAC1 RASA1    NF1  ERFF1    PTPN11    CBL  SOS1 JAK2
          FLT3 ROS1 ALK  RET  ABL1 NTRK3    NTRK2    NTRK1    PDGFRA
          KIT  MET  FGFR4    FGFR3    FGFR2    FGFR1    ERBB4
          ERBB3    ERBB2    IGF1R EGFR".split()
cell_cycle = "RB1    CDK2 CDK6 CDK4 CCNE1    CCND1    CCND2    CCND3
             CDKN2A CDKN2B CDKN2C CDKN1A CDKN1B E2F1
             E2F3".split()
p53 = "CDKN2A TP53 MDM2    MDM4    ATM  CHEK2
       RPS6KA3".split()
PI3K_Akt = "PTEN PIK3R2    PIK3R1    PIK3R3    PIK3CA    PIK3CB
           INPP4B    AKT1 AKT2 AKT3 PPP2R1A    STK11 TSC1 TSC2 RHEB RICTOR
           MTOR RPTOR".split()
b_catenin_Wnt = "WIF1    SFRP1 SFRP2 SFRP3 SFRP4 SFRP5 DKK1 DKK2 DKK3 DKK4
                LRP5 LRP6 RNF43 ZNRF3    AXIN1 AXIN2 AMER1    CTNNB1    GSK3B
```

```

        APC   TCF7   TCF7L1   TCF7L2   TLE1 TLE2 TLE3 TLE4".split()
Notch = "JAG2   ARRDC1   FBXW7   CUL1 NOV  CNTN6   NOTCH1
        NOTCH2   NOTCH3   NOTCH4   MAML3   CREBBP   KAT2B
        EP300 HES1   HES2 HES3 HES4 HES5 HEY1 HEY2 DNER PSEN2NCOR1
        NCOR2   SPEN  KDM5A".split()
Hippo = "DCHS1   DCHS2   FAT1  FAT2  FAT3  FAT4  TAOK1   TAOK2
        TAOK3   SAV1  STK3  STK4  NF2   LATS1 LATS2 MOB1A   MOB1B
        WWC1   CRB1  CRB2  YAP1  TAZ   PTPN14   CSNK1E   CSNK1D
        TEAD2".split()
Myc = "MYC MYCN   MYCLMAX MGA  MXD1 MXD3 MXD4 MXI1 MNT  MLX
        MLXIP   MLXIPL".split()
TGFb = "TGFB1   TGFB2   ACVR2A   ACRV1B   SMAD2   SMAD3
        SMAD4".split()
Nrf2 = "KEAP1   CUL3  NFE2L2".split()

```

# DNA damage response (DDR) pathways

```

BER = "APLF APTX  LIG1 LIG3   PARG PARP1 PARP3  PNKP POLB POLL   XRCC1
HMGB1  PCNA  POLD1 POLD2 POLD3 POLD4 RFC1 RFC2 RFC3 RFC4 RFC5  ALKBH1
APEX1 APEX2
                                FEN1   HMGB2  MBD4  MPG
MUTYH NEIL1 NEIL2 NEIL3   NTHL1  OGG1 PARP2 PARP4  POLE POLE2 POLE3
POLE4  POLK
                                SMUG1   TDG TDP1   UNG  WRN".split()

```

```

NER = "LIG1
RFC4 RFC5 RPA1 RPA2 RPA3 RPA4
                                CCNH CDK7 CETN2  CUL3 CUL4A CUL5
DDB1 DDB2   ERCC1 ERCC2 ERCC3 ERCC4 ERCC5 ERCC6 ERCC8
                                GTF2H1
GTF2H2 GTF2H3 GTF2H4 GTF2H5
                                MMS19 MNAT1
                                POLE POLE2
POLE3 POLE4
                                RAD23A RAD23B   RBX1
                                TCEA1 TCEB1 TCEB2
UVSSA  XAB2 XPA XPC".split()

```

```

MMR = "LIG1
EXO1 HMGB1 MLH1 MLH3 MSH2 MSH3 MSH6 PCNA PMS1
PMS2 POLD1 POLD2 POLD3 POLD4 RFC1 RFC2 RFC3 RFC4 RFC5 RPA1 RPA2 RPA3
RPA4".split()

```

```

FA = "XRCC2
APITD1  BARD1 BLM BRCA1 BRCA2 BRE BRIP1
ERCC1  ERCC4  FAAP100 FAAP24 FAAP20  FAN1 FANCA FANCB FANCC FANCD2
FANCE FANCF FANCG FANCI FANCL FANCM   HELQ HES1  MAD2L2
PALB2
                                RAD51 RAD51C   RMI1 RMI2   SLX1A SLX4  STRA13
TELO2 TOP3A TOP3B   UBE2T  USP1  WDR48".split()

```

```

HDR = "LIG1  MRE11A NBN PARG PARP1 PARBPB  RAD50  TP53BP1 XRCC2 XRCC3
EXO1   PCNA  POLD1 POLD2 POLD3 POLD4 RFC1 RFC2 RFC3 RFC4 RFC5 RPA1 RPA2
RPA3 RPA4   BARD1 BLM BRCA1 BRCA2  BRIP1   DMC1 DNA2  EID3 EME1
EME2 ERCC1
                                FANCM FEN1  GEN1   H2AFX HELQ  HFM1  INO80 KAT5
MUS81  NFATC2IP NSMCE1 NSMCE2 NSMCE3 NSMCE4A  PALB2 PARP2 PAXIP1
POLH  POLQ PPP4C PPP4R1 PPP4R2 PPP4R4   RAD51 RAD51B RAD51C RAD51D
RAD52 RAD54B RAD54L RBBP8 RDM1 RECQL RECQL4 RECQL5  RMI1 RMI2  RTEL1
SHFM1  SLX1A SLX1B SLX4 SMARCAD1 SMC5 SMC6  SPO11 SWSAP1   TOP3A TOP3B
UIMC1  WRN  ZSWIM7".split()

```

```

NHEJ = "DNTT  LIG4 MRE11A NBN NHEJ1 PARG PARP1 PARP3  PNKP POLB POLL POLM

```

PRKDC RAD50 RNF168 RNF8 TP53BP1 XRCC4 XRCC5 XRCC6  
DCLRE1C FAM175A  
RIF1".split()

DR = "ASCC3 ALKBH2 ALKBH3  
MGMT  
".split()

TLS = "POLB POLM UBE2A PCNA  
HLTF MAD2L2 POLH POLI POLK POLN POLQ RAD18  
REV1 REV3L SHPRH UBE2B UBE2N UBE2V2 USP1 WDR48".split()

NP = "NUDT1 NUDT15 NUDT18 RRM1 RRM2".split()

Others\_DDR = "ATM ATR ATRIP ATRX CHAF1A CHEK1 CHEK2 CLK2 DCLRE1A  
DCLRE1B DUT GADD45A GADD45G HUS1 MDC1 MPLKIP  
MRPL40 NABP2 PER1 POLA1 POLG PRPF19 RAD1 RAD17  
RAD9A RIF1 RNMT RRM2B SETMAR SLX4 TOPBP1 TP53 TREX1 TREX2  
TYMS PTEN TDP2 ENDOV SPRTN RNF4 SMARCA4 IDH1 SOX4 WEE1 RAD9B  
AEN PLK3 EXO5 CDC5L BCAS2 PLRG1 YWHAB YWHAG YWHA E CDC25A CDC25B  
CDC25C BABAM1 BRCC3 TTK SMARCC1 SWI5 MORF4L1 RNF169 HERC2".split()

# Splicing pathway

Spliceosome = "AGGF1 C9orf78 CCAR1 CD2BP2 CDC5L CDK11A  
CDK12 CELF4CFAP20 CLK4 CWC22 DDX17 DDX18  
DDX20 DDX23 DDX26B DDX27 DDX3X DDX41  
DDX5 DDX50 DHX16 DHX35 DHX36 DHX9 EEF1A1  
EFTUD2 EIF2S2 ELAVL1 ELAVL2 ELAVL4 FAM58A  
FRA10AC1 FUBP1 FUBP3 GPATCH8 HNRNPCL1 HNRNPD  
HNRNPDL HNRNPH3 HNRNPK HNRNPL IGF2BP3 INTS4 INTS7  
KIAA1429 KIN MBNL2 MOV10 NCBP1 NELFE NOVA1  
NSRP1 PABPC1 PCBP1PCBP2PCBP3PHF5A PLRG1 PPIG  
PPIL1 PPIL4 PRPF3 PRPF38B PRPF39 PRPF40B PRPF4B PSIP1  
QKI RALYL RBBP6 RBM10 RBM15B RBM25 RBM26  
RBM27 RBM7 RBM8A RBMXRBMX2 RNF20SF1 SF3B1 SF3B2  
SF3B3 SKIV2L2 SNRNP200 SNRNP35 SNRNP48 SNRPD3 SNRPN  
SPEN SRSF2 SRSF5 SYNCRIP TCERG1 THOC5 THOC6 THOC7  
THRAP3 TIA1 TIAL1 TNPO1 TRIM24 TTC14U2AF1 U2AF2  
U2SURP WBP11 WBP4 ZC3H13 ZC3H18 ZC3H4 ZCCHC8  
ZCRB1 ZMYM3 ZNF131 ZNF207 ZRSR2".split()

# Ubiquitination pathways

Ubq =  
"ABTB1\AHR\AIRE\AMBRA1\AMFR\ANAPC1\ANAPC10\ANAPC11\ANAPC13\ANAP  
C2\ANAPC4\ANAPC5\ANAPC7\APC2\AREL1\ARIH1\ARIH2\ARNT\ASB1\ASB11\AS  
B12\ASB15\ASB2\ASB3\ASB4\ASB6\ASB7\ASB8\ASB9\ATG16L1\AURKA\BARD1\B  
CL6B\BFAR\BIRC2\BIRC3\BIRC6\BIRC7\BMI1\BRAP\BRCA1\BRWD1\BTBD9\BTRC\  
tCADPS2\CAP1\CAPS2\CBL\CBLB\CBLC\CBLL1\CBX4\CCNB1IP1\CCNF\CDC16\CD

C20\tCDC23\tCDC26\tCDC27\tCDC34\tCDCA3\tCDH1\tCHFR\tCIAO1\tCISH\tCNOT4\tCORO7\tCRBN\tCREBBP\tCSTF1\tCUL1\tCUL2\tCUL3\tCUL4A\tCUL4B\tCUL5\tCUL7\tCUL9\tDCAF10\tDCAF11\tDCAF12\tDCAF13\tDCAF15\tDCAF16\tDCAF17\tDCAF4\tDCAF5\tDCAF6\tDCAF7\tDCAF8\tDCUN1D1\tDCUN1D2\tDCUN1D3\tDCUN1D5\tDDB1\tDDB2\tDTL\tDTX1\tDTX2\tDTX3\tDTX3L\tDTX4\tDZIP3\tE4F1\tEED\tEP300\tERCC8\tFANCL\tFBXL12\tFBXL14\tFBXL15\tFBXL17\tFBXL19\tFBXL2\tFBXL20\tFBXL21\tFBXL3\tFBXL4\tFBXL5\tFBXL6\tFBXL7\tFBXO10\tFBXO11\tFBXO15\tFBXO17\tFBXO18\tFBXO2\tFBXO22\tFBXO25\tFBXO27\tFBXO28\tFBXO3\tFBXO30\tFBXO31\tFBXO32\tFBXO33\tFBXO4\tFBXO40\tFBXO42\tFBXO44\tFBXO45\tFBXO6\tFBXO7\tFBXO8\tFBXO9\tFBXW10\tFBXW11\tFBXW2\tFBXW4\tFBXW5\tFBXW7\tFBXW8\tFEM1B\tFUS\tFZR1\tG2E3\tGAN\tGNB2\tGNB2L1\tGRWD1\tHACE1\tHECTD1\tHECTD2\tHECTD3\tHECTD4\tHECW1\tHECW2\tHERC1\tHERC2\tHERC3\tHERC4\tHERC5\tHERC6\tHLTF\tHOXB4\tHUWE1\tING1\tING4\tIRF2BP1\tIRF2BPL\tITCH\tKAT2B\tKATNB1\tKBTBD13\tKBTBD7\tKCMF1\tKCTD11\tKCTD13\tKCTD21\tKCTD5\tKCTD6\tKDM2B\tKEAP1\tKLHL10\tKLHL11\tKLHL12\tKLHL13\tKLHL17\tKLHL2\tKLHL20\tKLHL21\tKLHL22\tKLHL3\tKLHL40\tKLHL41\tKLHL42\tKLHL7\tKLHL8\tKLHL9\tKMT2A\tKMT2B\tLITAF\tLNX1\tLRR1\tLRRC41\tLRSAM1\tLTN1\tMAP3K1\tMARCH1\tMARCH10\tMARCH11\tMARCH2\tMARCH3\tMARCH4\tMARCH5\tMARCH6\tMARCH7\tMARCH8\tMARCH9\tMDM2\tMDM4\tMED8\tMGRN1\tMIB1\tMIB2\tMID1\tMID2\tMKRN1\tMNAT1\tMSL2\tMUL1\tMYCBP2\tMYLIP\tNACC1\tNAE1\tNARF\tNEDD4\tNEDD4L\tNEDD8\tNEURL1B\tNEURL2\tNEURL3\tNFX1\tNHLRC1\tNLE1\tNOSIP\tNSMCE1\tNSMCE2\tNUP43\tOSTM1\tPAF1\tPAFAH1B1\tPAM\tPARK2\tPCGF1\tPCGF2\tPCGF3\tPDLIM2\tPDZRN3\tPELI1\tPELI2\tPELI3\tPEX10\tPEX12\tPEX2\tPHIP\tPHRF1\tPJA1\tPJA2\tPLAA\tPML\tPOC1B\tPPARG\tPPIL2\tPRPF19\tPWP1\tRAB40C\tRABGEF1\tRAD18\tRAG1\tRANBP2\tRASD2\tRBBP4\tRBBP5\tRBBP6\tRBBP7\tRBCK1\tRBX1\tRC3H1\tRC3H2\tRCBTB1\tRCHY1\tREN\tRFFL\tRFPL4A\tRFWD2\tRFWD3\tRHOBTB1\tRHOBTB2\tRHOBTB3\tRICTOR\tRING1\tRLIM\tRNF10\tRNF103\tRNF11\tRNF111\tRNF113A\tRNF113B\tRNF114\tRNF115\tRNF121\tRNF122\tRNF123\tRNF125\tRNF126\tRNF128\tRNF13\tRNF130\tRNF133\tRNF135\tRNF138\tRNF139\tRNF14\tRNF141\tRNF144B\tRNF146\tRNF150\tRNF152\tRNF166\tRNF167\tRNF168\tRNF170\tRNF180\tRNF181\tRNF182\tRNF185\tRNF186\tRNF19A\tRNF19B\tRNF2\tRNF20\tRNF208\tRNF213\tRNF216\tRNF217\tRNF220\tRNF24\tRNF25\tRNF26\tRNF31\tRNF34\tRNF38\tRNF4\tRNF40\tRNF41\tRNF43\tRNF5\tRNF6\tRNF7\tRNF8\tRNFT1\tRWDD3\tSAG\tSART1\tSH3RF1\tSH3RF3\tSHPRH\tSIAH1\tSIAH2\tSKP2\tSMU1\tSMURF1\tSMURF2\tSNRNP40\tSNURF\tSOCS1\tSOCS2\tSOCS3\tSOCS4\tSOCS5\tSOCS6\tSOCS7\tSPOP\tSPSB1\tSPSB2\tSPSB4\tSTC1\tSTUB1\tSYVN1\tTAF5\tTBL1X\tTBL1XR1\tTCEB1\tTCEB2\tTLE1\tTLE2\tTLE3\tTMEM129\tTMF1\tTNFAIP1\tTOPORS\tTRAF2\tTRAF3\tTRAF3IP2\tTRAF5\tTRAF6\tTRAF7\tTRAIP\tTRIM11\tTRIM13\tTRIM15\tTRIM17\tTRIM2\tTRIM21\tTRIM22\tTRIM23\tTRIM24\tTRIM25\tTRIM26\tTRIM27\tTRIM28\tTRIM3\tTRIM31\tTRIM32\tTRIM33\tTRIM34\tTRIM35\tTRIM36\tTRIM37\tTRIM38\tTRIM39\tTRIM4\tTRIM40\tTRIM41\tTRIM43\tTRIM45\tTRIM46\tTRIM47\tTRIM5\tTRIM50\tTRIM51\tTRIM54\tTRIM56\tTRIM59\tTRIM6\tTRIM62\tTRIM63\tTRIM65\tTRIM68\tTRIM71\tTRIM72\tTRIM73\tTRIM74\tTRIM8\tTRIM9\tTRIP12\tTRPC4AP\tTSG101\tTTC3\tUBA1\tUBA2\tUBA3\tUBA5\tUBA6\tUBA7\tUBE2A\tUBE2B\tUBE2C\tUBE2D1\tUBE2D2\tUBE2D3\tUBE2D4\tUBE2E1\tUBE2E2\tUBE2E3\tUBE2F\tUBE2G1\tUBE2G2\tUBE2H\tUBE2I\tUBE2J1\tUBE2J2\tUBE2K\tUBE2L3\tUBE2L6\tUBE2M\tUBE2N\tUBE2O\tUBE2Q1\tUBE2Q2\tUBE2R2\tUBE2S\tUBE2T\tUBE2U\tUBE2V1\tUBE2V2\tUBE2W\tUBE2Z\tUBE3A\tUBE3B\tUBE3C\tUBE3D\tUBE4A\tUBE4B\tUBOX5\tUBR1\tUBR2\tUBR3\tUBR4\tUBR5\tUBR7\tUFC1\tUFL1\tUHRF1\tUHRF2\tVHL\tVPRBP\tVPS18\tVPS41\tWDR11\tWDR12\tWDR26\tWDR5\tWDR53\tWDR59\tWDR5B\tWDR61\tWDR76\tWDR82\tWDTC1\tWSB1\tWSB2\tWWP1\tWWP2\tXIAP\tZBTB18\tZC3HC1\tZFP91\tZMIZ1\tZMIZ2\tZNF230\tZNF645\tZNRF1\tZNRF2\tZNRF3\tZNRF4\tZSWIM2\t".split()

Dubq = "ALG13      ATXN3      ATXN3L      BAP1 BRCC3      COPS5      COPS6  
CYLD EIF3F EIF3H JOSD1 JOSD2 MPND MYSM1      OTUB1      OTUB2  
OTUD1      OTUD3      OTUD4      OTUD5      OTUD6A      OTUD6B

OTUD7A OTUD7B PAN2 PARP11 PRPF8 PSMD14 PSMD7  
 STAMPB STAMBPL1 TNFAIP3 UCHL1 UCHL3 UCHL5  
 USP1 USP10 USP11 USP12 USP13 USP14 USP15 USP16 USP17L2 USP18 USP19  
 USP2 USP20 USP21 USP22 USP24 USP25 USP26 USP27X USP28 USP29 USP3  
 USP30 USP31 USP32 USP33 USP34 USP35 USP36 USP37 USP38 USP39 USP4 USP40  
 USP41 USP42 USP43 USP44 USP45 USP46 USP47 USP48 USP49 USP5 USP50 USP51  
 USP53 USP54 USP6 USP7 USP8 USP9X USP9Y VCIPI1 YOD1  
 ZRANB1 FAM63A FAM63B FAM188A FAM188B".split()

# # Metabolic pathways

Amino\_acid = "SLC3A2 GOT1 GOT2 ACAD8 ACADSB NDUFAB1 ASPA  
 AGXT2 GPT ARG2 ARG1 ASL ASNS ASS1 SAT1 TAT BCAT2  
 BCAT1 BCKDK BHMTBBOX1 CBS CNBP2 CTH CPS1  
 CRYMCSAD CDO1 HIBADH ALDH7A1 AMD1 HDC ODC1 DDC  
 ALDH9A1 GLUD1 GLUD2 QDPR SLC25A10 DLD DBH SHFM1  
 FAH IL4I1 FOLH1 FTCD GAMTGATMGCDH GCSH GLDC AMT CGA  
 GNMTGLUL GLS GLS2 SHMT1 GCLMGCLC HAO1 HSD17B10 HGD  
 HNMTHPD HAL UROC1 IDO1 INMT DIO3 IVD GCAT CKB CKM  
 CKMT2 CKMT1A KYNUSLC7A5 LIAS LIPT1 GSTZ1 SLC45A2  
 AIMP1 AIMP2 EEF1E1 MCCC1 MCCC2 MTR MAT1A  
 ALDH6A1 MTAP MTRR NAALAD2 NNMTNQO1 OAT OAZ2 OAZ3 OAZ1  
 DBT BCKDHA BCKDHB AZIN1 SLC25A21 OGDHDLST DLAT PDHA1  
 PDHB PDHX SLC25A15 SLC25A2 OTC DAO DDO PAH PCBD1  
 PNMT PAPSS1 PYCR1 PRODH PSMC5 PSMA8  
 ALDH4A1 OCA2 RPS4Y2 SLC6A7 SLC6A8 SLC6A11 SLC6A12  
 AHCY SECISBP2 EEFSEC PHGDH PSPH PSAT1 SLC5A5 AANAT  
 PIPOXAGMAT SRM SMS AGXT SQRD L SUOX DARS EPRS IARS  
 KARS MARS QARS RARS SARS TDO2 SERINC3 SERINC1 ACAT1  
 TST TMLHE TXNRD1 TSHB TYRP1 DCT TYR PSMD14  
 NAGS HIBCH AASS AADAT KMO ACMSD RPS10 RPS11 RPS12  
 RPS13 RPS14 RPS15 RPS16 RPS17 RPS18 RPS19 RPS15A RPS2 RPS20 RPS21  
 RPS23 RPS24 RPS25 RPS26 RPS27 RPS27A RPS28 RPS29 RPS3 FAU RPS3A  
 RPS4X RPS4Y1 RPS5 RPS6 RPS7 RPS8 RPS9 RPSA RPLP0 RPLP1  
 RPLP2 RPL10 RPL10A RPL11 RPL12 RPL13 RPL13A RPL14 RPL15 RPL17  
 RPL18 RPL18A RPL19 RPL21 RPL22 RPL23 RPL23A RPL24 RPL26 RPL26L1  
 RPL27 RPL27A RPL28 RPL29 RPL3 RPL3LRPL30 RPL31 RPL32 RPL34 RPL35  
 RPL35A RPL36 RPL37 RPL37A RPL38 RPL39 RPL4 UBA52 RPL41  
 RPL36A RPL5 RPL6 RPL7 RPL7A RPL8 RPL9 AUH PSMC1  
 PSMC4 PSMC2 PSMC3 PSMC6 PSMA1 PSMA2  
 PSMA3 PSMA4 PSMA5 PSMA6 PSMA7 PSMB1  
 PSMB2 PSMB3 PSMB4 PSMB5 PSMB6 PSMB7  
 PSMB8 PSMB9 PSMB10 PSMD1 PSMD2 PSMD3  
 PSMD4 PSMD5 PSMD6 PSMD7 PSMD8 PSMD9  
 PSMD10 PSMD11 PSMD12 PSMD13 PSME1 PSME2  
 PSME3 PSMF1 RPL39L SERINC2 TPH2 PAOX ADO GRHPR  
 CCBL1 ALDH18A1 RPS27L SMOXLARS AFMID AMDHD1  
 APIP ASRGL1 BHMT2 C9orf41 DHTKD1 DUOX1 DUOX2  
 MRI1 ENOPH1 ETHE1 GADL1 GSR IDO2 CCBL2 ASPG  
 ADI1 NMRAL1 PYCR2 PYCRL PPM1K PSMB11 PSME4  
 PSTK RPL10L RPL22L1 RPL36AL SCLY SEPSECS CARNS1

LIPT2 SERINC4 SERINC5 PAPSS2 TH TPO TPH1 ASMT DIO1  
IYD GPT2 DIO2 ADC".split()

Carbohydrates = "PPP2R1A PPP2R1B PGD PGLS AAAS GOT1 GOT2 AKR1A1  
AKR1B1 ALDOA ALDOB ALDOC AMY2B AMY2A  
AMY1A NAGLU ARSB B3GAT1 B3GAT2 B3GAT3 B3GNT1  
B3GNT2 B3GNT3 B4GALT1 B4GALT2 B4GALT3 B4GALT4  
B4GALT5 B4GALT6 B4GALT7 GLB1 GUSB CALM1 CD44  
SLC25A12 SLC25A13 CRYL1 DERA ALDH1A1 SORD SLC25A10  
SLC26A2 ENO1 ENO3 ENO2 EXT1 EXT2 FBP1 FBP2 PFKFB1 PFKFB2  
PFKFB3 PFKFB4 FGF21 FMOD GAPDH GAPDHS G6PD GPI  
G6PC GALNS GALK1 GALT GALE GCKR AGL GNS GLCE GBE1  
GYG1 GNPDA1 GPC1 GPC3 GPC4 GPC5 GPC6 SLC2A1 SLC2A2  
SLC2A3 SLC2A4 SLC2A5 GYG2 GYS1 GYS2 HAS1 HAS2 HAS3  
HEXA HEXB HMMR NDST1 NDST2 HK1 HK2 HK3 HYAL2  
IDS IDUA NUP160 PFKM PFKL PFKP PRKACA PRKACB PRKACG  
KERA KHK PHKA1 PHKA2 PHKB PHKG1 PHKG2 PRPS1  
PRPS2 PRPS1L1 PKLR LALBA LCT LUM GAA MAN2B1 MAN2B2  
MAN2C1 SLC25A11 MANBA MDH1 MDH2 MGAM OGN ABCC5  
NUP107 NUP153 NUP214 SLC9A1 NUP37 NUP43  
NUP50 NUP62 NUP88 OMD PPP2CA PPP2CB HSPG2  
ACAN NCAN VCAN PGK1 PGK2 PGM1 BGN DCN PYGL PYGMPYGB PGAM1  
PGAM2 BPGMPCK1 PCK2 PAPSS1 PRELP PC RAE1 RANBP2  
RPIA SLC26A1 SDC1 SDC2 SDC3 SDC4 ST3GAL1 ST3GAL2  
ST3GAL4 ST3GAL3 SLC5A1 SLC5A2 SLC5A3 SLC5A4  
SGSH SI TALDO1 TKT TPR TREH SLC25A1 NUP155 RPS27A  
UBA52 CHIA CHIT1 NUP133 NUP54 NUPL1 RPE TPI1  
AGRND CXR EPM2A KIAA1199 NUP205 NHLRC1 NUP93  
NUP98 BCAN SLC45A3 STAB2 SEH1L ST3GAL6 NUPL2  
NUP85 NUP35 ADPGK B3GNT4 B3GNT7 B3GALT6  
CSGALNACT1 CSGALNACT2 CHPF2 CHSY1 CHPF CHSY3  
CHST1 CHST2 CHST3 CHST5 CHST6 CHST7  
CHST9 CHST11 CHST12 CHST13 CHST14 CSPG4  
CSPG5 DSEL DSE GLB1L GLYCTK GPC2 SLC2A14 HS6ST1  
HS6ST2 HS6ST3 HGSNAT HPSE2 HPSE HS2ST1 HYAL1  
HYAL3 LYVE1 NDST3 NDST4 NUP188 HS3ST1  
HS3ST2 HS3ST3A1 HS3ST3B1 HS3ST4 HS3ST5 HS3ST6  
PGM2 NUP210 PPP1R3C RSC1A1 SLC35B2 SLC35B3 SLC35D2  
SLC5A10 CHST15 UST XYLB XYLT1 XYLT2 G6PC2 G6PC3  
SLC5A9 GNPDA2 POM121 POM121C SLC37A4 PAPSS2  
GCK PPP2R5D UGP2 UBC UBB".split()

Energy = "PPP2R1A PPP2R1B ADRA2A PRKAA2 PRKAB2 PRKAG2  
ACLY CHRM3 SLC25A4 SLC25A5 SLC25A6 ADIPOQ ARL2  
CACNA1A CACNA1E CACNB2 CACNB3 ACACB ADCY1  
ADCY2 ADCY3 ADCY4 ADCY5 ADCY6 ADCY7  
ADCY8 ADCY9 PFKFB1 FASN GNA11 GNA14 GNA15  
GNAS GNB1 GNB2 GNB3 GNB4 GNGT1 GNG3 GNG4 GNG5 GNG7 GNG8  
GNG10 GNG11 GNG12 GNG13 GNGT2 GNAI1 GNAI2  
GNAQ GCGR GCG FFAR1 SLC2A1 SLC2A2 INS ITPR3 KCNJ11  
PRKAR1A PRKAR1B PRKAR2A PRKAR2B PRKACA PRKACB  
PRKACG PRKCA PKLR MARCKS MLX PPP2CA PPP2CB

|         |        |         |          |         |                |
|---------|--------|---------|----------|---------|----------------|
| PLCB1   | PLCB2  | PLCB3   | AGPAT1   | RAP1A   | AHCYL1         |
| STK11   | SYT5   | TALDO1  | TKT      | VAMP2   | MLXIPL         |
| ADIPOR2 | GNG2   | ADRA2C  | CACNA2D2 | ARL2BP  | CACNA1C        |
| GLP1R   |        |         |          |         |                |
| AKAP5   | KCNS3  | IQGAP1  | KCNB1    | KCNG2   | GNB5           |
| RAPGEF3 | SNAP25 | STXBP1  | CACNA1D  | ABCC8   | ACACA          |
| ITPR2   | ITPR1  | PPP2R5D | STX1A    | RAPGEF4 | KCNC2".split() |

Lipid = "HSD3B1

|           |          |         |          |          |         |
|-----------|----------|---------|----------|----------|---------|
| HSD3B2    | AP2A1    | AP2A2   | AP2B1    | AP2M1    | A2M     |
| AP2S1     | PRKAA2   | PRKAB2  | PRKAG2   | ABCB11   | ABCA1   |
| ABCG5     |          |         |          |          |         |
| ABCG8     | DBI      | ACADL   | ACADM    | ACADS    | ACADVL  |
| ACHE      |          |         |          |          |         |
| ACLY      | SCD      | NDUFAB1 | AGPS     | PLIN2    | FDXR    |
| GLA       |          |         |          |          |         |
| AHR       |          |         |          |          |         |
| AKR1C1    |          |         |          |          |         |
| AKR1C2    | AKR1C3   | AKR1C4  | AKR1D1   | ALB      | AKR1B1  |
| ABCD1     |          |         |          |          |         |
| AMACR     | AGT      | ANGPTL3 | ANGPTL4  | APOA1    | APOA2   |
| APOA4     |          |         |          |          |         |
| APOB      | APOC1    | APOC2   | APOC3    | APOC4    | APOE    |
| APOF      |          |         |          |          |         |
| ACER3     |          |         |          |          |         |
| LPA       | ARF1     | ARF3    | ARNT2    | ARNT     | ARSA    |
| ARSB      |          |         |          |          |         |
| ARSD      |          |         |          |          |         |
| ARSE      |          |         |          |          |         |
| ARSF      |          |         |          |          |         |
| ASAH1     |          |         |          |          |         |
| SMPD1     | ACOT7    | CEL     | BDH1     | GLB1     | BHMT    |
| BMX       |          |         |          |          |         |
| CYP11A1   |          |         |          |          |         |
| CYP39A1   | ACOT12   | CRAT    | B4GALNT1 | ACOX1    | ACOX2   |
| ACOX3     |          |         |          |          |         |
| CAV1      | NFYB     | CREBBP  | CD36     | CDS1     | CDS2    |
| UGCG      |          |         |          |          |         |
| CETP      |          |         |          |          |         |
| ACOT9     |          |         |          |          |         |
| CCNC      |          |         |          |          |         |
| UGT8      | BCHE     | CIDEA   | CLOCK    | CPNE1    | CPNE3   |
| CPNE6     |          |         |          |          |         |
| CPNE7     | ACACB    | POMC    | CLPS     | COQ3     | COQ6    |
| COQ7      |          |         |          |          |         |
| CYP1A1    |          |         |          |          |         |
| CYP1A2    |          |         |          |          |         |
| CYP1B1    | CYP27A1  | CYP46A1 | CYP4B1   | CYP4A11  | CYP51A1 |
| CYP7A1    | CYP7B1   | CYP8B1  | CYP2C8   | CYP2C9   | CYP2C19 |
| CYP4F2    | CYP4F3   | CYP4F11 | CYP2J2   | CYP11B1  | CYP11B2 |
| CYP21A2   | CPT1A    | CPT2    | CYP17A1  | CPT1B    | CYP19A1 |
| MED17     |          |         |          |          |         |
| MED7      | SPTLC3   | FITM2   | CTGF     | PCYT1A   | PCYT1B  |
| MID1      |          |         |          |          |         |
| IP1       |          |         |          |          |         |
| ALDH7A1   | DAB1     | GNPAT   | MLYCD    | DECR1    | DGAT1   |
| ALDH3B1   | ALDH3B2  | HSD17B1 | HSD17B2  | HSD17B3  | HSD17B4 |
| HSD17B8   | DHCR7    | CBR1    | DHCR24   | HSD11B1  | HSD11B2 |
| EBP       |          |         |          |          |         |
| HADHA     | HADHB    | ECHS1   | EHHADH   | ETNK1    | ETNK2   |
| ELOVL1    | ELOVL2   | ELOVL3  | ELOVL4   | MVD      | TM7SF2  |
| SQLE      |          |         |          |          |         |
| LSS       | ESRRA    | FAAH    | FABP4    | FABP7    | FABP5   |
| FABP3     |          |         |          |          |         |
| FABP2     |          |         |          |          |         |
| FABP1     |          |         |          |          |         |
| FASN      |          |         |          |          |         |
| FDFT1     |          |         |          |          |         |
| FGF21     | ALOX5AP  | FDPS    | CIDEC    | FURIN    | KDSR    |
| FYN       |          |         |          |          |         |
| PIKFYVE   |          |         |          |          |         |
| G0S2      | GALC     | GGPS1   | GGT1     | GGT5     | GK2     |
| GBA       |          |         |          |          |         |
| CGA       |          |         |          |          |         |
| GLIPR1    |          |         |          |          |         |
| GK        |          |         |          |          |         |
| GLTP      | GPD1     | GPD2    | PNPLA4   | GPX1     | GPX2    |
| GPX4      |          |         |          |          |         |
| TECR      |          |         |          |          |         |
| HAO2      |          |         |          |          |         |
| HADHALAS1 |          |         |          |          |         |
| HEXA      | HEXB     | HMGCS2  | HMGCS1   | HACL1    | HRASLS5 |
| HRASLS    |          |         |          |          |         |
| HRASLS2   | PLA2G16  | EPHX2   | IDH1     | IDI1     | IDI2    |
| FABP6     |          |         |          |          |         |
| KPNB1     |          |         |          |          |         |
| INSIG1    | PRKACA   | PRKACB  | PRKACG   | CSNK1G2  | CSNK2A2 |
| CSNK2B    | GPCPD1   | CHKB    | CHKA     | MVK      | PRKD1   |
| PRKD3     |          |         |          |          |         |
| PRKD2     |          |         |          |          |         |
| PTGR1     | LTC4S    | LCAT    | SPTLC1   | SPTLC2   | ACSL1   |
| ACSL3     |          |         |          |          |         |
| ACSL4     | ACSL5    | ACSL6   | LDLR     | VLDLR    | LIPA    |
| PNLIPRP1  |          |         |          |          |         |
| LIPG      | LIPF     | LIPC    | LPL      | PNLIP    | LIPE    |
| LTA4      |          |         |          |          |         |
| HALOX15   |          |         |          |          |         |
| ALOX5     |          |         |          |          |         |
| ALOX12    |          |         |          |          |         |
| ALOX12B   | LPIN1    | LPIN2   | LPIN3    | LHB      | ALOX15B |
| DMGDH     |          |         |          |          |         |
| ME1       |          |         |          |          |         |
| SLC25A20  | DPEP1    | ABCB4   | MED6     | STARD3NL | MAPK    |
| APK2      |          |         |          |          |         |
| STARD3    |          |         |          |          |         |
| ABCC1     | ABCC3    | MBTPS1  | MBTPS2   | MTM1     | MTTP    |
| MTMR1     |          |         |          |          |         |
| MTMR2     | MTMR3    | MTMR6   | MTMR7    | MUT      | NCOA2   |
| NEU1      |          |         |          |          |         |
| NEU2      | NEU3     | TRIB3   | SCP2     | NPAS2    | NPC1    |
| NPC2      |          |         |          |          |         |
| NR1D1     |          |         |          |          |         |
| NRF1      |          |         |          |          |         |
| NR1H2     |          |         |          |          |         |
| NSDHL     | SMPD2    | SLC10A2 | SLC10A1  | CROT     | OSBPL1A |
| OSBPL2    |          |         |          |          |         |
| OSBPL3    | OSBPL5   | OSBPL6  | OSBPL7   | OSBPL8   | OSBPL9  |
| OSBPL10   | OSBP     | PIK3CA  | PIK3CB   | PIK3CD   | PIK3CG  |
| EP300     |          |         |          |          |         |
| PIK3R3    | PIK3R1   | PIK3R2  | PLA2G1B  | PLA2G3   | PLA2G4A |
| PLA2G5    | PLA2G6   | PLA2G2A | PLA2G2D  | PLA2G2E  | PLA2G2F |
| PLA2G10   | PLA2G12A | PHYH    | PCCA     | PCCB     | PCSK5   |
| STARD10   |          |         |          |          |         |
| PCYT2     |          |         |          |          |         |

|          |         |          |          |          |           |         |          |         |      |
|----------|---------|----------|----------|----------|-----------|---------|----------|---------|------|
| P4HB     | PEMT    | HPGDS    | HPGD     | PTGS1    | PTGS2     | PTGDS   | PI4KA    | PIP4K2A |      |
| CDIPT    | PIK3C2B | PIK3C2G  | AGPAT1   | AGPAT2   | AGPAT3    | AGPAT4  |          |         |      |
| AGPAT5   | PLD2    | PLIN1    | GPAM     | PLTP     | SLC25A17  | PMVK    | ACOT13   | PON1    |      |
| PON2     | PON3    | PPP1CA   | PPP1CB   | PPP1CC   | PPARA     | PPARD   |          |         |      |
| ALPI     | PCTP    | PITPNB   | PPT1     | PPT2     | CTSA      | PTDSS1  | ACOT8    | ACOT2   |      |
| PTEN     | PTGES   | PTGIS    | PTPN13   | RAB14    | RAB5A     | RELN    | RGL1     |         |      |
| RORA     | RXRA    | SLCO1A2  | SLCO1B1  | SLCO1B3  | SEC23A    | SEC24A  |          |         |      |
| SEC24B   | SEC24C  | SEC24D   | SRD5A1   | GM2A     | PSAP      | SAR1B   |          |         |      |
| SCAP     | OXCT1   | FHL2     | SOAT1    | SOAT2    | SP1       | SPHK1   | SPHK2    |         |      |
| MED21    | SREBF2  | STAR     | STARD4   | STARD5   | STARD6    | STARD7  |          |         |      |
| STS      | SULT2A1 | MED22    | SYNJ1    | SYNJ2    | MED24     | THRAP3  | MED12    |         |      |
| MED13    | TBL1XR1 | TBL1X    | TEAD1    | TEAD2    | TEAD3     |         |          |         |      |
| TEAD4    | PTGES3  | TAZ      | TBXAS1   | ACOT11   | THRSP     | ACAA1   |          |         |      |
| ACAT1    | ACAA2   | PLIN3    | RARRES3  | TPTE     | TNFRSF21  | TXNRD1  |          |         |      |
| SLC25A1  | VAPA    | VAPB     | HDLBP    | SLC27A2  | LPGAT1    | FIG4    | YAP1     |         |      |
| ZDHHC8   | CDK8    | RAN      | RAB4A    | PLD1     | LBR       | MCEE    | HMGCL    | PNPLA3  |      |
| AMN      | CERK    | TMEM55B  | CRLS1    | DDHD1    | MMAA      | PI4KB   | INPP5J   |         |      |
| PCSK9    | EPT1    | SGPL1    | SH3KBP1  | INPP5K   | SIN3A     | SIN3B   | MED31    |         |      |
| SGPP1    | SGPP2   | SCARB1   | SUMF1    | SUMF2    | MED20     | HSD3B7  |          |         |      |
| B3GALNT1 | ARNTL   | BMP1     | COL4A3BP | CHDH     | ACOT1     | ALDH3A2 |          |         |      |
| MCAT     | HMGCR   | INPP5E   | MGLL     | MYLIP    | PLA2G4C   | PIP4K2B |          |         |      |
| PLEKHA1  | PLEKHA2 | PLEKHA3  | PLEKHA4  | PLEKHA5  | PLEKHA6   |         |          |         |      |
| PPARGC1A | PTDSS2  | ACOT4    | RUFY1    | SARDH    | OLAH      | SGMS1   |          |         |      |
| SGMS2    | SREBF1  | ACAT2    | BAAT     | THEM4    | LDLRAP1   | APOA5   |          |         |      |
| PIK3C3   | PIK3R4  | CH25H    | SLC27A5  | TGS1     | CSNK2A1   | CYP4F22 |          |         |      |
| MED25    | MED14   | MED30    | MED4     | AACS     | ABHD3     | ABHD4   |          |         |      |
| ABHD5    | ACBD4   | ACBD5    | ACBD6    | ACBD7    | ACSBG1    |         |          |         |      |
| ACSBG2   | ACAD10  | ACAD11   | ACOT6    | ACOXL    | ACSF2     |         |          |         |      |
| ACSF3    | ACSM3   | ACSS3    | NCEH1    | AGK      | ANKRD1    | ARSG    |          |         |      |
| ARSH     | ARSI    | ARSJ     | ARSK     | ARV1     | ACER2     | ASA2    | ACER1    | AWAT1   |      |
| AWAT2    | BDH2    | CARM1    | CBR4     | CDK19    | CEPT1     | CHD9    | CHPT1    |         |      |
| COQ2     | COQ5    | COQ9     | CREB3L3  | SLC44A1  | SLC44A2   | SLC44A3 | SLC44A4  |         |      |
| SLC44A5  | CUBN    | DDHD2    | DECR2    | DEGS1    | DEGS2     |         |          |         |      |
| DGAT2L6  | DGAT2   | HSD17B11 | HSD17B12 | HSD17B13 | HSD17B14  |         |          |         |      |
| PDSS2    | DPEP2   | DPEP3    | PDSS1    | ELOVL5   | ELOVL6    | ELOVL7  | ENPP6    | ENPP7   |      |
| CES3     | ESYT1   | ESYT2    | ESYT3    | FAAH2    | FABP9     | FAR1    | FAR2     |         |      |
| FADS1    | FADS2   | GBA2     | GDE1     | GDPD1    | GDPD3     | GDPD5   | GLB1L    |         |      |
| GLTPD1   | GPD1L   | GRHL1    | GPIHBP1  | INPP4A   | INPP4B    |         |          |         |      |
| INSIG2   | LIPH    | LIPI     | LIPJ     | LIPK     | LIPM      | LIPN    | PNLIPRP3 | LMF1    | LMF2 |
| LSR      | LCLAT1  | MBOAT1   | MBOAT2   | LPCAT3   | MBOAT7    | MED13L  |          |         |      |
| MED10    | MED11   | MED18    | MED19    | MED28    | MED29     |         |          |         |      |
| MED9     | MFSD2A  | MOGAT1   | MOGAT2   | MOGAT3   | MTF1      | MTMR4   |          |         |      |
| MTMR14   | NPC1L1  | SMPD3    | SMPD4    | NUDT19   | NUDT7     |         |          |         |      |
| ORMDL1   | ORMDL2  | ORMDL3   | PIK3C2A  | PI4K2A   | PI4K2B    |         |          |         |      |
| PLA2G4D  | PLA2G4E | PLA2G4F  | LPCAT1   | LPCAT2   | PECR      | PTGES2  |          |         |      |
| PHOSPHO1 | PIK3R5  | PIK3R6   | PIP4K2C  | PIP5K1A  | PIP5K1B   |         |          |         |      |
| PIP5K1C  | PITPNM1 | PITPNM2  | PITPNM3  | PLEKHA8  | PLA1A     |         |          |         |      |
| PLA2R1   | PLB1    | PLBD1    | AGPAT6   | LPCAT4   | AGPAT9    | PLD3    |          |         |      |
| PLD4     | PNPLA2  | PNPLA5   | PNPLA6   | PNPLA7   | PNPLA8    | GPAT2   |          |         |      |
| ACP6     | PPM1L   | PPARGC1B | PTPLAD1  | PTPLAD2  | PTPMT1    | PEX11A  |          |         |      |
| SLC27A1  | SLC27A3 | TECRL    | SRD5A3   | SACM1L   | SCD5      | INPP5D  |          |         |      |
| INPPL1   | SMARCD3 | TNFAIP8  | THEM5    | TMEM86B  | TNFAIP8L1 |         |          |         |      |



|           |         |         |         |       |                  |           |       |
|-----------|---------|---------|---------|-------|------------------|-----------|-------|
| TNFAIP8L2 | TPTE2   | FITM1   | VAC14   | WWTR1 | PLD6             | PTGR2     | CHAT  |
| C10orf129 | AHRR    | FAM120B | HMGCLL1 | PGS1  | INPP5F           | TNFAIP8L3 |       |
| NCOA6     | CYP4A22 | FABP12  | PTPLA   | PTPLB | HDAC3            |           |       |
| NCOR1     | MED26   | CLTA    | NFYA    | PCSK6 | PPARG            | ABCG1     |       |
| HSD17B7   | CLTC    | OCRL    | ACACA   | NR1H3 | NFYC             | MED1      | NCOA1 |
| MED27     | CYP2U1  | TIAM2   | MED8    | NR1H4 | MED15            | MED23     |       |
| MED16     | NCOR2   | NCOA3   | PISD    | NEU4  | AKR1B15".split() |           |       |

Nucleotide = "NT5C2 NT5E ADA ADK AGXT2 AMPD1 AMPD2 AMPD3  
 APRT UPB1 CAT CDA DCK DCTD DGUOK DPYD DPYS ENTPD1  
 ENTPD2 ENTPD3 ENTPD4 ENTPD5 ENTPD6 GLRX GMPR  
 GMPR2 GPX1 GMPS GDA HPRT1 IMPDH1 IMPDH2 AK1 AK2  
 AK5 CMPK1 GUK1 TK2 DTYMK NME1 NME2 NME4 NUDT5  
 PNP PPAT GART PFAS PAICS ADSL ATIC ADSS CAD UMPS DHODH  
 RRM1 RRM2 TXN TXNRD1 TYMP TYMS UCK1 UCK2 UPP1 XDH TK1  
 ITPA AK7 NT5C NT5M ADSSL1 UPP2 NT5C1A NT5C1B DUT  
 NUDT13 POMP NUDT1 ADAL DDX31 ENTPD7 ENTPD8  
 GSR LHPP NUDT15 NUDT16 CTPS2 RRM2B DCTPP1 NUDT18  
 NUDT9".split()

TCA\_cycle = "ACO2 NDUFAB1 ATP5G1 ATP5G2 ATP5G3 ATP5A1  
 ATP5BATP5D ATP5EATP5F1 ATP5C1 ATP5I ATP5J2 ATP5L  
 ATP5O ATP5H ATP5J ATP5S BSG SDHC NDUFAF1 CS  
 COX7A2L COX5A COX5B COX6A1 COX6B1 COX6C  
 COX7B COX7C COX8A COX11 COX4I1 CYC1 CYCS  
 SDHA SDHB SDHD DLD ETFA ETFB FH IDH3AIDH3BIDH3GIDH2 LDHA  
 LDHB LDHC LDHAL6B GLO1 LRPPRC MDH2 SLC16A1 SLC16A8  
 SLC16A3 NDUFA7 NDUFC2 NDUFA12 NDUFB3 NDUFA6  
 NDUFB4 NDUFA13 NDUFB6 NDUFB7 NDUFB9 NDUFA2  
 NDUFA3 NDUFB8 NDUFB10 NDUFB2 NDUFC1 NDUFA1  
 NDUFB1 NDUFS5 NDUFB5 NNT NDUFS1 NDUFV1 NDUFS2  
 NDUFA10 NDUFA9 NDUFA5 NDUFS3 NDUFV2 NDUFS8  
 NDUFS7 NDUFA4 NDUFS6 NDUFV3 NDUFA8 NDUFS4  
 OGDHDLST DLAT PDHA1 PDHB PDHX PDK1 PDK2 PDK3 PDK4 PDP1  
 PDP2 PPARD RXRA SUCLA2 SUCLG2 SCO1 SCO2 SUCLG1  
 SURF1 TRAP1 UCP1 UCP2 SLC25A27 UQCRC1 UQCRC2  
 UQCRB UQCRH UQCRFS1 UQCRQ UQCR10 UQCR11  
 ACAD9 NDUFAF4 NUBPL NDUFB11 COX18 TACO1  
 LDHAL6A NDUFA11 ECSIT NDUFAF3 COX16 COX19 COQ10A  
 COQ10B D2HGDH ADHFE1 L2HGDH NDUFAF2 TMEM126B  
 PDPR SLC25A14 UCP3 ETFDH HAGH".split()

Vitamin\_cofactor = "NT5E ABCD4 AOX1 AKR1B10 AKR1C1 AKR1C3  
 AKR1C4 APOA1 APOA2 APOA4 APOB APOC2 APOC3  
 APOE APOMHLCS BST1 BTM MTHFD1 CD38 CTRC ACACB CLPS  
 CYP24A1 CYP27B1 CYP8B1 CTRB1 CYB5A SLC25A19  
 DHFR FASN SLC19A1 FOLR2 ALDH1L1 MTHFS SLC25A16  
 GPHN SHMT1 SHMT2 GPC1 GPC3 GPC4 GPC5 GPC6 GSTO1  
 SLC2A1 SLC2A3 GIF LDLR LGMNLPL PNLIP LRP1 LRP2 MCCC1  
 MCCC2 MTR SLC25A32 MOCS3 ABCC1 MOCS2 MTHFD2  
 MTHFR MTRR MUT QPRT COASY CYB5R3 NNMTENPP1ENPP2  
 ENPP3NAMPT PCCA PCCB PDXK HSPG2 PTGS2PANK2 PANK3

|        |         |         |          |         |          |         |         |         |        |      |
|--------|---------|---------|----------|---------|----------|---------|---------|---------|--------|------|
| PANK4  | ACP5    | NADK    | PARP4    | PTGIS   | PC       | RBP1    | RBP2    | RBP4    | SDC1   | SDC2 |
| SDC3   | SDC4    | SLC5A6  | LRP12    | SLC23A1 | SLC23A2  | TCN1    | TCN2    | SLC19A2 |        |      |
| PRSS1  | PRSS3   | TTR     | VNN1     | VNN2    | GC       | LRAT    | AMN     | PARP9   | BCMO1  | BCO2 |
| GSTO2  | MMAA    |         | MMAB     |         | NMNAT1   | NMNAT2  | PNPO    | RDH11   |        |      |
| RFK    | THTPA   |         | AGRNL    | LRP10   | LRP8     | NMNAT3  | PPCS    | TPK1    | VKORC1 |      |
| PPCDC  | FLAD1   |         | NADSYN1  | FPGS    | AASDHPPT | SLC19A3 | SLC46A1 |         |        |      |
| CYP2R1 | APOA1BP |         | ALDH1L2  | MMADHC  | CD320    | CTRB2   | CUBN    |         |        |      |
| DHFRL1 | GPC2    | GPIHBP1 | LMBRD1   | MMACHC  | MOCOS    | NFS1    |         |         |        |      |
| NUDT12 | PARP10  |         | PARP14   | PARP16  | PARP6    | PARP8   | PDZD11  |         |        |      |
| RFT1   | PLB1    | NAPRT1  | SLC22A13 | UBIAD1  | VKORC1L1 | MTHFD2L |         |         |        |      |
| SLC5A8 | CARKD   |         | MTHFD1L  | ACACA   | PANK1    | MOCS1   |         |         |        |      |

# All pathways

```
pathways = [["RTK_RAS", "cell_cycle", "p53", "PI3K_Akt", "b_catenin_Wnt", "Notch", "Hippo",
"Myc", "TGFb", "Nrf2", "BER", "NER", "MMR", "FA", "HDR", "NHEJ", "DR", "TLS", "NP",
"Others_DDR", "Spliceosome", "Ubq", "Dubq", "Amino_acid", "Carbohydrates", "Energy",
"Lipid", "Nucleotide", "TCA_cycle", "Vitamin_cofactor"], [RTK_RAS, cell_cycle, p53, PI3K_Akt,
b_catenin_Wnt, Notch, Hippo, Myc, TGFb, Nrf2, BER, NER, MMR, FA, HDR, NHEJ, DR, TLS,
NP, Others_DDR, Spliceosome, Ubq, Dubq, Amino_acid, Carbohydrates, Energy, Lipid,
Nucleotide, TCA_cycle, Vitamin_cofactor]]
```

```
path_gene_mut = pd.DataFrame(columns=["Pathway", "Gene", "Mutation rate (%)"])
```

```
c = 0
```

```
j = -1
```

```
for pathway in pathways[1]:
```

```
    j += 1
```

```
    for g in pathway:
```

```
        for ind in genes.Gene.index:
```

```
            if genes.Gene[ind] == g.upper() and genes.iloc[ind]["Driver Gene"] == "Yes":
```

```
                c += 1
```

```
                path_gene_mut.loc[c] = pathways[0][j], g.upper(), genes.iloc[ind]["Frequency"]
```

```
                break
```

```
path_gene_mut.to_csv("all_pathways_drivers.csv")
```

Program that extends the final produced matrix of the previous program in order to comprise the genes of one more pathway (immunomodulators).

```
cd ~\python programming\2
```

```
import pandas as pd
```

```
genes = pd.read_csv("gene_mutation_frequencies.csv")
```

```
i = -1
```

```

for freq in genes.Frequency:
    i += 1
    genes.Frequency[i] = float(freq.replace(",", "."))

path_gene_mut = pd.read_csv("all_pathways_drivers.csv")
path_gene_mut = path_gene_mut.drop(columns="Unnamed: 0")

# Immunomodulators

Immunomodulators = "ADORA2A ARG1 BTLA BTN3A1 BTN3A2 CCL5 CD27
CD274CD276CD28 CD40 CD40LG CD70 CD80 CTLA4 CX3CL1
CXCL10 CXCL9 EDNRB ENTPD1 GZMAHAVCR2 HLA-A
HLA-B HLA-C HLA-DPA1 HLA-DPB1 HLA-DQA1 HLA-DQA2
HLA-DQB1 HLA-DQB2 HLA-DRA HLA-DRB1 HLA-DRB3 HLA-DRB4
HLA-DRB5 HMGB1 ICAM1 ICOS ICOSLG IDO1 IFNA1 IFNA2
IFNG IL10 IL12A IL13 IL1A IL1B IL2 IL2RA IL4 ITGB2 KIR2DL1
KIR2DL2 KIR2DL3 LAG3 MICA MICB PDCD1 PDCD1LG2 PRF1
SELP SLAMF7 TGFB1 TIGIT TLR4 TNF TNFRSF14 TNFRSF18
TNFRSF4 TNFRSF9 TNFSF4 TNFSF9 VEGFA VEGFB
VSIR VTCN1".split()

c = len(path_gene_mut)
for g in Immunomodulators:
    for ind in genes.Gene.index:
        if genes.Gene[ind] == g.upper() and genes.iloc[ind]["Driver Gene"] == "Yes":
            path_gene_mut.loc[c] = "Immunomodulators", g.upper(), genes.iloc[ind]["Frequency"]
            c += 1
            break

path_gene_mut.to_csv("all_pathways_drivers_complete.csv")

```

Program that creates a figure containing 29 horizontal bar graphs, each showing the mutational rate of the cancer genes of a different pathway.

```

cd ~\python programming\2

import pandas as pd
import matplotlib.pyplot as plt
import numpy as np

genes = pd.read_csv("all_pathways_drivers_complete.csv")

# How many out of the 31 pathways are represented in genes Dataframe ?
len(set(list(genes.Pathway)))
# None of the genes of DR and NP pathways' gene lists are characterized as
# cancer genes by oncoKB database. Thus, from the following pathways list,
# these two pathways were excluded.

```

```

pathways = ["RTK_RAS", "cell_cycle", "p53", "PI3K_Akt", "b_catenin_Wnt", "Notch", "Hippo",
            "Myc", "TGFb", "Nrf2", "BER", "NER", "MMR", "FA", "HDR", "NHEJ", "TLS", "Others_DDR",
            "Spliceosome", "Ubq", "Dubq", "Amino_acid", "Carbohydrates", "Energy", "Lipid", "Nucleotide",
            "TCA_cycle", "Vitamin_cofactor", "Immunomodulators"]
titles = ["RTK/RAS", "Cell cycle", "p53", "PI3K Akt", "b catenin/Wnt", "Notch", "Hippo", "Myc",
          "TGFb", "Nrf2", "BER", "NER", "MMR", "FA", "HDR", "NHEJ", "TLS", "Other DDR",
          "Splicing", "Ubiquitination", "Deubiquitination", "Amino acids", "Carbohydrates", "Energy",
          "Lipids", "Nucleotides", "TCA cycle", "Vitamins", "Immunomodulators"]

fig, ax = plt.subplots(3, 10)
fig.set_size_inches(30, 40)
plt.subplots_adjust(wspace=3.5)
ax[2, 9].remove()

plots = []

colors = ["r", "r", "r", "r", "r", "r", "r", "r", "r", "r", "b", "m", "g",
          "g", "c", "c", "c", "c", "c", "c", "c", "y"]
ind = -1
for i in range(3):
    for j in range(10):
        if i == 2 and j == 9:
            continue
        else:
            ind += 1
            z = genes[genes.Pathway == pathways[ind]].sort_values(by="Mutation rate (%)",
ascending=False)
            g = list(z.Gene)
            y = np.arange(len(g))
            x = np.array(z["Mutation rate (%)"])
            p = ax[i][j].barh(y, x, align='center', color=colors[ind])

            # Add only the first plot of each category to plots list
            if ind in [0, 10, 18, 19, 21, 28]:
                plots.append(p)

            ax[i][j].set_yticks(y)
            ax[i][j].set_yticklabels(g)
            ax[i][j].invert_yaxis() # labels read top-to-bottom
            ax[i][j].set_title(titles[ind], fontweight='bold', fontsize=14)
            ax[i][j].set_ylabel('Genes', fontweight='bold')
            ax[i][j].set_xlabel('Mutation rate (%)', fontweight='bold')

fig.legend(tuple(plots), ("Mitogenic", "DDR", "Splicing", "Ubiquitination", "Metabolic",
"Immunomodulators"), "lower right", prop={'size': 14})
plt.tight_layout()
plt.savefig("mut_rate.pdf")

```

Create a string "query" which contains all the different genes of pandas dataframe x, written in a

way that permits the search of only driver mutations when put on "Query by gene" search bar of cBioPortal.

```
cd ~\python programming\2
```

```
import pandas as pd
```

```
x = pd.read_csv("all_pathways_drivers_complete.csv")
```

```
query = ""
# Create a string "query" which contains all the different genes of x,
# written in a way that permits the search of only driver mutations when put
# on "Query by gene" search bar of cBioPortal.
for g in list(set(x.Gene)):
    query = query + g + ": DRIVER,"

query.strip()
query = query[:-1]
```

Program that renames all the 340 downloaded files of driver mutations, giving them the name of the gene where the driver mutations refer to. Then, it checks if all the files contain the same column names and with the same order, something critical for the right concatenation of the files in one file. Finally, it creates and saves a file containing all the driver mutations of all the genes for which there was such content at the respective file (204 out of the 340). In empty\_files list, there are the file names of the genes that do not belong to the 204.

```
cd ~\python programming\2\driver mutations of our 340 cancer genes
```

```
import pandas as pd
```

```
import os
```

```
from pathlib import Path
```

```
# Sort files of the working directory (wd) by modification date (starting from
# the oldest one).
```

```
wd = 'C:\\Users\\Καλλιρρόη\\ΑΛΕΞΑΝΔΡΟΣ\\Paper E.I.E\\ΔΙΚΕΣ ΜΟΥ ΑΝΑΖΗΤΗΣΕΙΣ\\python
programming\\2\\driver mutations of our 340 cancer genes'
paths = sorted(Path(wd).iterdir(), key=os.path.getmtime)
```

```
# There is a complete match at the elements order of fnames and gene_fnames.
```

```
fnames = []
```

```
for i in paths:
```

```
    fnames.append(str(i).split("\\")[-1])
```

```
gene_fnames = "TRIM24: DRIVER,DTX1: DRIVER,WRN: DRIVER,BRCA2: DRIVER,ATM:
DRIVER,FANCG: DRIVER,RAD52: DRIVER,OMD: DRIVER,ZMYM3: DRIVER,JAK2:
DRIVER,BAP1: DRIVER,EED: DRIVER,DDB2: DRIVER,RAD51: DRIVER,CYP17A1:
```

DRIVER,CD28: DRIVER,NBN: DRIVER,TNFAIP3: DRIVER,CYLD: DRIVER,CD276:  
DRIVER,BRAF: DRIVER,KDM2B: DRIVER,NOTCH4: DRIVER,CBLB: DRIVER,POLQ:  
DRIVER,CDKN1B: DRIVER,ATR: DRIVER,TP53BP1: DRIVER,PIK3C2G: DRIVER,PARP3:  
DRIVER,GPC3: DRIVER,FANCE: DRIVER,ROS1: DRIVER,XPC: DRIVER,NTHL1:  
DRIVER,CDK12: DRIVER,USP8: DRIVER,U2AF2: DRIVER,XRCC2: DRIVER,RPL10:  
DRIVER,CHEK1: DRIVER,SF3B1: DRIVER,MED12: DRIVER,PPP1CB: DRIVER,NFE2L2:  
DRIVER,BARD1: DRIVER,MAP3K1: DRIVER,PTPN13: DRIVER,ZNRF3: DRIVER,NUP214:  
DRIVER,PDGFRA: DRIVER,RB1: DRIVER,NTRK2: DRIVER,SFRP2: DRIVER,RMI2:  
DRIVER,NTRK3: DRIVER,SFRP1: DRIVER,SMAD4: DRIVER,KIT: DRIVER,MGA:  
DRIVER,DDX3X: DRIVER,PIK3R3: DRIVER,IL2: DRIVER,ICOSLG: DRIVER,RAF1:  
DRIVER,XPA: DRIVER,TLE1: DRIVER,MTAP: DRIVER,CBLC: DRIVER,ATIC:  
DRIVER,CREBBP: DRIVER,PARP2: DRIVER,SOCS2: DRIVER,SPOP: DRIVER,KMT2A:  
DRIVER,MET: DRIVER,ERCC2: DRIVER,FANCF: DRIVER,FGFR4: DRIVER,SDHD:  
DRIVER,PER1: DRIVER,ETNK1: DRIVER,DCUN1D1: DRIVER,CCND2: DRIVER,AKT1:  
DRIVER,DDX41: DRIVER,NRAS: DRIVER,CYP19A1: DRIVER,IDH1: DRIVER,TCEA1:  
DRIVER,CDK4: DRIVER,NCOA2: DRIVER,GNAS: DRIVER,EXT1: DRIVER,SOCS3:  
DRIVER,LRP6: DRIVER,RPTOR: DRIVER,SPRTN: DRIVER,SRSF2: DRIVER,POLE:  
DRIVER,PML: DRIVER,NOTCH3: DRIVER,PIK3CG: DRIVER,DKK2: DRIVER,NUP93:  
DRIVER,CCND3: DRIVER,PIK3C3: DRIVER,RANBP2: DRIVER,PPP2R1A:  
DRIVER,CDKN2C: DRIVER,RNF43: DRIVER,RAD51B: DRIVER,GNB1: DRIVER,NT5C2:  
DRIVER,DKK4: DRIVER,CDH1: DRIVER,TRIM27: DRIVER,MGAM: DRIVER,VHL:  
DRIVER,INPP4A: DRIVER,FANCL: DRIVER,PMS2: DRIVER,CCNB1IP1: DRIVER,MDC1:  
DRIVER,VTGN1: DRIVER,NCOR2: DRIVER,RELN: DRIVER,NF2: DRIVER,MDM4:  
DRIVER,POLD1: DRIVER,NOTCH2: DRIVER,FYN: DRIVER,TRAF7: DRIVER,MUTYH:  
DRIVER,TLE2: DRIVER,RAD51C: DRIVER,SDHC: DRIVER,FAT4: DRIVER,XIAP:  
DRIVER,FURIN: DRIVER,TGFBR1: DRIVER,PMS1: DRIVER,PPP4R2: DRIVER,TP53:  
DRIVER,RPL5: DRIVER,CLTC: DRIVER,CDKN1A: DRIVER,LATS1: DRIVER,GNAQ:  
DRIVER,TRAF5: DRIVER,FLT3: DRIVER,NF1: DRIVER,CD274: DRIVER,APC:  
DRIVER,IDH2: DRIVER,TLE3: DRIVER,VEGFA: DRIVER,PRKDC: DRIVER,YAP1:  
DRIVER,GSK3B: DRIVER,BLM: DRIVER,NUP98: DRIVER,AXIN1: DRIVER,CD70:  
DRIVER,TGFBR2: DRIVER,FBXO31: DRIVER,SDHB: DRIVER,U2AF1: DRIVER,SFRP4:  
DRIVER,CUL4A: DRIVER,SMAD2: DRIVER,CDKN2B: DRIVER,PALB2: DRIVER,CCND1:  
DRIVER,FUS: DRIVER,PSIP1: DRIVER,ACSL6: DRIVER,MSH3: DRIVER,DKK3:  
DRIVER,CRBN: DRIVER,RECQL4: DRIVER,YWHAE: DRIVER,ALB: DRIVER,AXIN2:  
DRIVER,HLA-C: DRIVER,DKK1: DRIVER,QKI: DRIVER,ACSL3: DRIVER,RPL22:  
DRIVER,AKT2: DRIVER,RASA1: DRIVER,FAT1: DRIVER,GNA11: DRIVER,TCF7L2:  
DRIVER,RAD54L: DRIVER,SPEN: DRIVER,RTKL1: DRIVER,ERCC3: DRIVER,PDCD1:  
DRIVER,AMER1: DRIVER,EP300: DRIVER,ARNT: DRIVER,PIK3C2B: DRIVER,FGFR3:  
DRIVER,FGFR2: DRIVER,TSC2: DRIVER,HEY1: DRIVER,MSH2: DRIVER,CUL3:  
DRIVER,PIK3R1: DRIVER,PPARG: DRIVER,FANCC: DRIVER,KRAS: DRIVER,MAD2L2:  
DRIVER,KMT2B: DRIVER,KDSR: DRIVER,TRIM33: DRIVER,PRKAR1A: DRIVER,E2F3:  
DRIVER,CTNNB1: DRIVER,IL10: DRIVER,TSC1: DRIVER,IGF1R: DRIVER,CBL:  
DRIVER,MTOR: DRIVER,WIF1: DRIVER,ALK: DRIVER,RHEB: DRIVER,ATRX:  
DRIVER,CDKN2A: DRIVER,MDM2: DRIVER,RAD50: DRIVER,INPP4B: DRIVER,PC:  
DRIVER,INPP5D: DRIVER,PIK3CA: DRIVER,FGFR1: DRIVER,HRAS: DRIVER,FH:  
DRIVER,ERCC4: DRIVER,RAC1: DRIVER,FANCD2: DRIVER,CHEK2: DRIVER,PCBP1:  
DRIVER,RICTOR: DRIVER,GPHN: DRIVER,SDC4: DRIVER,ALOX12B: DRIVER,RBM10:  
DRIVER,EGFR: DRIVER,KEAP1: DRIVER,SDHA: DRIVER,PTEN: DRIVER,INPL1:  
DRIVER,UBR5: DRIVER,BRCA1: DRIVER,KDM5A: DRIVER,AKT3: DRIVER,PDK1:  
DRIVER,MYC: DRIVER,FBXW7: DRIVER,ERBB2: DRIVER,FANCA: DRIVER,MSH6:  
DRIVER,CDK8: DRIVER,STK11: DRIVER,NADK: DRIVER,PDCD1LG2: DRIVER,GMPS:  
DRIVER,RET: DRIVER,ERCC5: DRIVER,MYCN: DRIVER,BIRC3: DRIVER,HLA-A:

```
DRIVER,WWTR1: DRIVER,AURKA: DRIVER,TPR: DRIVER,LRP5: DRIVER,PIK3R2:
DRIVER,ERRF1: DRIVER,CPS1: DRIVER,RAD51D: DRIVER,TNFRSF14: DRIVER,MAX:
DRIVER,ZRSR2: DRIVER,FBXO11: DRIVER,TBL1XR1: DRIVER,PTPN11: DRIVER,SLX4:
DRIVER,PRKACA: DRIVER,NOTCH1: DRIVER,HLA-B: DRIVER,MAPK1: DRIVER,CAD:
DRIVER,HSD3B1: DRIVER,TRAF2: DRIVER,PIK3CB: DRIVER,CACNA1D:
DRIVER,CTLA4: DRIVER,MAP2K1: DRIVER,RXRA: DRIVER,ERBB3: DRIVER,SMAD3:
DRIVER,PARP1: DRIVER,TRAF3: DRIVER,NCOA1: DRIVER,DDX5: DRIVER,SOCS1:
DRIVER,EXT2: DRIVER,PIK3CD: DRIVER,NTRK1: DRIVER,MAP2K2: DRIVER,PRKD1:
DRIVER,USP6: DRIVER,BTLA: DRIVER,FUBP1: DRIVER,CDK6: DRIVER,ARAF:
DRIVER,MYCL: DRIVER,LATS2: DRIVER,RECQL: DRIVER,SOS1: DRIVER,CCNE1:
DRIVER,SMARCA4: DRIVER,ABL1: DRIVER,CARM1: DRIVER,ACVR2A: DRIVER,PRF1:
DRIVER,MLH1: DRIVER,RNF213: DRIVER,SLC45A3: DRIVER,BRIP1: DRIVER,CD36:
DRIVER,PRSS1: DRIVER,MIB1: DRIVER,NCOR1: DRIVER,TLE4: DRIVER,NCOA3:
DRIVER,BABAM1: DRIVER,ERBB4: DRIVER".replace("": DRIVER", ".tsv").split(",")
```

```
for n in range(len(fnames)):
    ind = os.listdir().index(fnames[n])
    os.rename(os.listdir()[ind], gene_fnames[n])
```

```
empty_files = []
c = -1
dfs = []
for file in os.listdir():
    c += 1
    x = pd.read_csv(file, sep="\t")
    if len(x) > 0:
        # There is at least one file (HLA-A.tsv) without column "Annotation".
        # If we don't fix this, the dataframes concatenation will not be correct.
        if x.columns[4] != "Annotation":
            x.insert(loc=4, column="Annotation", value="")

        # Add column "Gene" as the first column of each pd.DataFrame.
        x.insert(loc=0, column='Gene', value=os.listdir()[c].replace(".tsv", ""))
        dfs.append(x)
    else:
        # Keep the names of the files that lack entries.
        empty_files.append(file)
        continue
```

```
# Check if all DataFrames in dfs have the same column names and in the same
# order. This is very important for an appropriate concatenation.
```

```
same_columns = 0
for df in dfs:
    if len(dfs[0].columns == df.columns) == len(df.columns):
        same_columns += 1
same_columns == len(dfs)
```

```
# Concatenate pd.DataFrames
```

```
final_df = pd.DataFrame()
for df in dfs:
    final_df = pd.concat([final_df, df])
final_df.reset_index().drop(columns="index").to_csv("driver_mutations_for_204_cancer_genes.csv")
```

")

Program that extends all\_pathways\_drivers\_complete.csv file by a column called “Driver Mutation rate (%)” that contains the percentage (keeping 2 decimal places) of TCGA PanCancer Atlas projects samples that have driver mutations in the corresponding cancer gene.

```
cd ~\python programming\2
```

```
import pandas as pd
```

```
genes = pd.read_csv("all_pathways_drivers_complete.csv")
genes["Driver Mutation rate (%)"] = 0
for gene in list(set(final_df.Gene)):
    # The TCGA PanCancer Atlas Studies used for this analysis contain 10439
    # samples profiled for their mutations.
    percent_driver = len(set(final_df[final_df.Gene == gene]["Sample ID"])) / 10439 * 100

    # Format to two decimal places
    formatted_string = "{:.2f}".format(percent_driver)
    percent_driver = float(formatted_string)

    # Find the rows where Gene equals to gene and put the percent_driver in
    # "Driver Mutation rate (%)" column.
    genes.loc[genes.Gene == gene, "Driver Mutation rate (%)"] = percent_driver

genes.to_csv("all_pathways_drivers_more_complete.csv")
```

Program that creates a figure containing 27 horizontal bar graphs, each showing the driver mutational rate of the cancer genes of a different pathway.

```
cd ~\python programming\2
```

```
import pandas as pd
import matplotlib.pyplot as plt
import numpy as np
```

```
genes = pd.read_csv("all_pathways_drivers_more_complete.csv")
genes = genes.drop(columns=["Unnamed: 0", "Unnamed: 0.1"])
```

```
# How many out of the 31 pathways are represented in genes Dataframe ?
len(set(genes.Pathway))
# None of the genes of DR and NP pathways' gene lists are characterized as
# cancer genes by oncoKB database. Thus, from the following pathways list,
# these two pathways were excluded.
```

```
pathways = ["RTK_RAS", "cell_cycle", "p53", "PI3K_Akt", "b_catenin_Wnt", "Notch", "Hippo",
```



```

"Myc", "TGFb", "Nrf2", "BER", "NER", "MMR", "FA", "HDR", "NHEJ", "Others_DDR",
"Spliceosome", "Ubq", "Dubq", "Amino_acid", "Carbohydrates", "Energy", "Lipid", "Nucleotide",
"TCA_cycle", "Immunomodulators"]
titles = ["RTK/RAS", "Cell cycle", "p53", "PI3K Akt", "b catenin/Wnt", "Notch", "Hippo", "Myc",
"TGFB", "Nrf2", "BER", "NER", "MMR", "FA", "HDR", "NHEJ", "Other DDR", "Splicing",
"Ubiquitination", "Deubiquitination", "Amino acids", "Carbohydrates", "Energy", "Lipids",
"Nucleotides", "TCA cycle", "Immunomodulators"]

fig, ax = plt.subplots(3, 10)
fig.set_size_inches(30, 40)
plt.subplots_adjust(wspace=3.5)
for i in range(7, 10):
    ax[2, i].remove()

plots = []

colors = ["r", "r", "r", "r", "r", "r", "r", "r", "r", "r", "b", "b", "b", "b", "b", "b", "b", "b", "m", "g", "g",
"c", "c", "c", "c", "c", "c", "y"]
ind = -1
for i in range(3):
    for j in range(10):
        if i == 2 and j in [7, 8, 9]:
            continue
        else:
            ind += 1
            z = genes[genes.Pathway == pathways[ind]].sort_values(by="Driver Mutation rate (%)",
ascending=False)
            g = list(z.Gene)
            y = np.arange(len(g))
            x = np.array(z["Driver Mutation rate (%)"])
            p = ax[i][j].barh(y, x, align='center', color=colors[ind])

            # Add only the first plot of each category to plots list
            if ind in [0, 10, 17, 18, 20, 26]:
                plots.append(p)

            ax[i][j].set_yticks(y)
            ax[i][j].set_yticklabels(g, fontsize=10)
            ax[i][j].invert_yaxis() # labels read top-to-bottom
            ax[i][j].set_title(titles[ind], fontweight='bold', fontsize=14)
            ax[i][j].set_ylabel('Genes', fontweight='bold')
            ax[i][j].set_xlabel('Driver Mutation rate (%)', fontweight='bold')

fig.legend(tuple(plots), ("Mitogenic", "DDR", "Splicing", "Ubiquitination", "Metabolic",
"Immunomodulators"), "lower right", prop={'size': 14})
plt.tight_layout()
plt.savefig("driver_mut_rate.pdf")

```

Program that creates a list of tuples with each tuple containing a pathway name and the total number of driver mutations found in its genes over all the TCGA PanCancer Atlas projects samples

profiled for their mutations.

```
cd ~\python programming\2\driver mutations of our 340 cancer genes
```

```
import pandas as pd
```

```
final_df = pd.read_csv("driver_mutations_for_204_cancer_genes.csv")
```

```
cd ~\python programming\2
```

```
genes = pd.read_csv("all_pathways_drivers_more_complete.csv")
```

```
genes = genes.drop(columns=["Unnamed: 0", "Unnamed: 0.1"])
```

```
driver_mut_path = []
```

```
for path in list(set(genes.Pathway)):
```

```
    num_driver_mut = 0
```

```
    for g in list(set(genes[genes.Pathway == path]["Gene"])):
```

```
        num_driver_mut += len(final_df[final_df.Gene == g])
```

```
    driver_mut_path.append((path, num_driver_mut))
```

```
driver_mut_path = sorted(driver_mut_path, key = lambda x: x[1], reverse=True)
```

Program that calculates the percentage of samples with driver mutations for 27 cancer related pathways. The calculation refers to all the TCGA PanCancer Atlas projects samples profiled for their mutations.

```
cd ~\python programming\2\driver mutations of our 340 cancer genes
```

```
import pandas as pd
```

```
final_df = pd.read_csv("driver_mutations_for_204_cancer_genes.csv")
```

```
cd ~\python programming\2
```

```
genes = pd.read_csv("all_pathways_drivers_more_complete.csv")
```

```
genes = genes.drop(columns=["Unnamed: 0", "Unnamed: 0.1"])
```

```
genes = genes[genes["Driver Mutation rate (%)"] > 0]
```

```
paths_driver_mut = pd.DataFrame(columns=["Pathway", "Samples with driver mutations(%)"])
```

```
c = 0
```

```
for path in list(set(genes.Pathway)):
```

```
    c += 1
```

```
    samples = []
```

```
    for g in list(set(genes[genes.Pathway == path]["Gene"])):
```

```
        for s in list(final_df[final_df.Gene == g]["Sample ID"]):
```

```
            samples.append(s)
```

```
# The TCGA PanCancer Atlas Studies used for this analysis contain 10439
```

```
# samples profiled for their mutations.
```

```
percent = len(set(samples)) / 10439 * 100
```

```
# Format to two decimal places
formatted_string = "{:.2f}".format(percent)
percent = float(formatted_string)
```

```
paths_driver_mut.loc[c] = path, percent
paths_driver_mut = paths_driver_mut.sort_values(by="Samples with driver mutations(%)",
ascending=False).reset_index().drop(columns="index")
paths_driver_mut.to_csv("paths_driver_mut_rate.csv")
```

Program that adds the cancer stage for each sample in  
“driver\_mutations\_for\_204\_cancer\_genes.csv” file. Then, it creates a new file  
“driver\_mutations\_for\_204\_cancer\_genes\_and\_stage.csv” with only these entries that correspond to  
samples for which their cancer stage is available.

```
cd ~\python programming\2\driver mutations of our 340 cancer genes
```

```
import pandas as pd
```

```
muts = pd.read_csv("driver_mutations_for_204_cancer_genes.csv").drop(columns="Unnamed: 0")
muts.insert(loc=4, column="Stage", value=0)
```

```
ids = list(set(muts["Sample ID"]))
```

```
cd ~\python programming\2
```

```
clinical = pd.read_csv("clinical_data.tsv", sep="\t")
```

```
for ID in ids:
```

```
    ind = clinical[clinical["Sample ID"] == ID].index[0]
    stage = clinical.iloc[ind]["Neoplasm Disease Stage American Joint Committee on Cancer Code"]
    muts.loc[muts["Sample ID"] == ID, "Stage"] = stage
```

```
# nan values (not a number) are float numbers. So, you can find if an item "x"
# is a nan by asking for its type --> type(x) == float. If the only float
# items are the nan items, then you can identify them this way.
```

```
dropped_ind = []
samples = []
cancer_types = []
for i in muts.index:
    if type(muts.iloc[i].Stage) == float:
        dropped_ind.append(i)
        samples.append(muts.iloc[i]["Sample ID"])
        cancer_types.append(muts.iloc[i]["Cancer Type"])
samples = set(samples)
cancer_types = set(cancer_types)
muts.drop(dropped_ind).reset_index().drop(columns="index").to_csv("driver_mutations_samples_
with_stage_available.csv")
```

```
# len(samples) equals to 2951 and cancer_types equals to 46.
# This means that for the 2951 out of 8276 samples the cancer stage is not
```

```
# available. Also, these 2951 samples belong to 46 out of 67 cancer types. The
# new file "driver_mutations_samples_with_stage_available.csv" contains only
# entries with available cancer stage.
```

Program that isolates only the driver mutational data of the samples with known stage and creates a table containing the type of cancer, the total number of unique samples suffering from each type of cancer and the total number of samples of each stage.

```
import pandas as pd
```

```
cd ~\python programming\2
```

```
mut = pd.read_csv("driver_mutations_samples_with_stage_available.csv")
```

```
# len(set(mut["Cancer Type"])) equals to 40. So, from the 67 cancer types,
# the stage of the disease is available for patients belonging to the 40 of them.
```

```
remaining = pd.DataFrame(columns=["Cancer Type", "Number of samples"])
```

```
# The following stages are all the different stages present on "remaining"
# DataFrame. We can display them using the command set(mut.Stage).
```

```
stages = ['STAGE 0',
'STAGE I',
'STAGE I/II (NOS)',
'STAGE IA',
'STAGE IB',
'STAGE II',
'STAGE IIA',
'STAGE IIB',
'STAGE IIC',
'STAGE III',
'STAGE IIIA',
'STAGE IIIB',
'STAGE IIIC',
'STAGE IS',
'STAGE IV',
'STAGE IVA',
'STAGE IVB',
'STAGE IVC',
'STAGE X']
```

```
for st in stages:
    remaining[st] = 0
```

```
n = 0
```

```
c = 0
```

```
for ct in list(set(mut["Cancer Type"])):
    n += len(set(mut[mut["Cancer Type"] == ct]["Sample ID"]))
    x = mut[mut["Cancer Type"] == ct]
    remaining.loc[c, remaining.columns[2:]] = ct, len(set(x["Sample ID"]))
```

```

    for st in remaining.columns[2:]:
        remaining.loc[c, st] = len(set(x[x.Stage == st]["Sample ID"]))
    c += 1
remaining.sort_values(by="Number of samples",
ascending=False).reset_index().drop(columns="index").to_csv("remaining_samples_stage_available.csv")

# Check if the sum of unique samples is right.
n == len(set(muts["Sample ID"]))

```

Program that modifies the file remaining\_samples\_stage\_available.csv in order to include columns with the total number of samples of each stage.

```

cd ~\python programming\2

import pandas as pd

nums = pd.read_csv("remaining_samples_stage_available.csv", index_col=0)

stage_I = ["STAGE I", "STAGE IA", "STAGE IB"]
stage_II = ["STAGE II", "STAGE IIA", "STAGE IIB", "STAGE IIC"]
stage_III = ["STAGE III", "STAGE IIIA", "STAGE IIIB", "STAGE IIIC"]
stage_IV = ["STAGE IV", "STAGE IVA", "STAGE IVB", "STAGE IVC"]

stages = [stage_I, stage_II, stage_III, stage_IV]

pools = ["Pool STAGE I", "Pool STAGE II", "Pool STAGE III", "Pool STAGE IV"]

c = 0
for i in range(2, 6):
    nums.insert(loc=i, column=pools[c], value="")
    c += 1

pn = -1
for stage in stages:
    pn += 1
    for z in range(len(nums)):
        nums.loc[z, pools[pn]] = sum([nums.iloc[z][k] for k in stage])

nums.to_csv("remaining_samples_stage_available_pool.csv")

```

Program that clusters the substages (e.g. “STAGE IA” and “STAGE IB”) into the corresponding stages (e.g. I) and adds a new column “General Stage” that contains this information. This, is being done only for stages I – IV, not for the rest categories (e.g. “STAGE IS”, “STAGE X” etc). Also, it creates a new column “Change” that contains the mutated gene name and the protein change in a single column.

```

cd ~\python programming\2

```

```

import pandas as pd

mut = pd.read_csv("driver_mutations_samples_with_stage_available.csv", index_col=0)

stage_I = ["STAGE I", "STAGE IA", "STAGE IB"]
stage_II = ["STAGE II", "STAGE IIA", "STAGE IIB", "STAGE IIC"]
stage_III = ["STAGE III", "STAGE IIIA", "STAGE IIIB", "STAGE IIIC"]
stage_IV = ["STAGE IV", "STAGE IVA", "STAGE IVB", "STAGE IVC"]

stages = [("I", stage_I), ("II", stage_II), ("III", stage_III), ("IV", stage_IV)]

mut.insert(loc=5, column="General Stage", value="")
mut.insert(loc=7, column="Change", value="")

for i in range(len(mut)):

    x = mut.iloc[i]["Stage"]
    for z in range(len(stages)):
        if x in stages[z][1]:
            mut.loc[i, "General Stage"] = stages[z][0]

    ch = mut.iloc[i]["Gene"] + ", " + mut.iloc[i]["Protein Change"]
    mut.loc[i, "Change"] = ch

mut.to_csv("driver_mutations_samples_with_stage_available_fixed.csv")

```

Find mutations per stage and cancer type (alteration level analysis)

```
cd ~\python programming\2
```

```

import pandas as pd

nss = pd.read_csv("remaining_samples_stage_available_pool.csv", index_col=0)
mut = pd.read_csv("driver_mutations_samples_with_stage_available_fixed.csv", index_col=0)

# In our analysis, we exclude the following stages :
# "STAGE 0" and "STAGE IS" due to lack of samples in the cancer types of interest,
# "STAGE I/II (NOS)" and "STAGE X" due to the unclear nature of these stages.

stage_I = ["STAGE I", "STAGE IA", "STAGE IB"]
stage_II = ["STAGE II", "STAGE IIA", "STAGE IIB", "STAGE IIC"]
stage_III = ["STAGE III", "STAGE IIIA", "STAGE IIIB", "STAGE IIIC"]
stage_IV = ["STAGE IV", "STAGE IVA", "STAGE IVB", "STAGE IVC"]

cancer_types = ["Breast Invasive Ductal Carcinoma", "Lung Adenocarcinoma", "Lung Squamous
Cell Carcinoma", "Papillary Thyroid Cancer", "Head and Neck Squamous Cell Carcinoma",
"Cutaneous Melanoma", "Bladder Urothelial Carcinoma", "Colon Adenocarcinoma",
"Hepatocellular Carcinoma", "Renal Clear Cell Carcinoma", "Pancreatic Adenocarcinoma", "Breast

```

```
Invasive Lobular Carcinoma", "Stomach Adenocarcinoma", "Rectal Adenocarcinoma", "Papillary  
Renal Cell Carcinoma"]
```

```
dfs = []
```

```
c = -1
```

```
for can in cancer_types:
```

```
    mut_st = pd.DataFrame(columns=["Cancer Type", "Pool STAGE I", "Pool STAGE II", "Pool  
STAGE III", "Pool STAGE IV", "Change", "STAGE I", "STAGE I (%)", "STAGE II", "STAGE II  
(%)", "STAGE III", "STAGE III (%)", "STAGE IV", "STAGE IV (%)"])
```

```
    x = muts[muts["Cancer Type"] == can]
```

```
    ind = nss[nss["Cancer Type"] == can].index[0]
```

```
    a = nss.iloc[ind]["Pool STAGE I"]
```

```
    b = nss.iloc[ind]["Pool STAGE II"]
```

```
    d = nss.iloc[ind]["Pool STAGE III"]
```

```
    e = nss.iloc[ind]["Pool STAGE IV"]
```

```
    new_entry = [can, a, b, d, e]
```

```
for change in list(set(x.Change)):
```

```
    c += 1
```

```
    z = x[x.Change == change]
```

```
    appearances = [change]
```

```
    for st in ["I", "II", "III", "IV"]:
```

```
        appears = len(z[z["General Stage"] == st])
```

```
        # Some stages are not represented by any samples so at these
```

```
        # cases the denominator equals to zero, which is mathematically wrong.
```

```
        # Format to two decimal places.
```

```
        try:
```

```
            perc = appears / len(x[x["General Stage"] == st]) * 100
```

```
            formatted_string = "{:.2f}".format(perc)
```

```
            perc = float(formatted_string)
```

```
        except ZeroDivisionError:
```

```
            perc = "not applicable"
```

```
        # The binary value of "existence" variable represents the
```

```
        # existence (=1) or absence (=0) of a given change in a given stage.
```

```
        if appears > 0:
```

```
            existence = 1
```

```
        elif appears == 0:
```

```
            existence = 0
```

```
        appearances.append(existence)
```

```
        appearances.append(perc)
```

```
values = []
```

```
for item in [new_entry, appearances]:
```

```
    for value in item:
```

```
        values.append(value)
```

```
    mut_st.loc[c] = values
```

```
dfs.append(mut_st)
```

```
mut_st = pd.concat(dfs).reset_index().drop(columns="index")
```

```
mut_st.to_csv("mutations_per_cancer_type_and_stage.csv")
```

```

# Add a column showing all the stages each change occurs in.
eps = []
for i in range(len(mut_st)):
    sts = []
    for col in ['STAGE I', 'STAGE II', 'STAGE III', 'STAGE IV']:
        if mut_st.iloc[i][col] == 1:
            sts.append(col.split()[1])
    eps.append(", ".join(sts))
# "COS" stands for "Change Occurrence per Stage" and each character of it
# represents the existence (=1) or absence(=0) of a given change (e.g. BRAF, V600E)
# at the samples examined for a given cancer type (e.g. 0101 means that the change)
# was observed only at stages II and IV and not at stages I and III)
mut_st["COS"] = eps
mut_st.to_csv("mutations_per_cancer_type_and_stage.csv")

```

Find mutations per stage and cancer type (gene level analysis)

```
cd ~\python programming\2
```

```
import pandas as pd
```

```

nss = pd.read_csv("remaining_samples_stage_available_pool.csv", index_col=0)
mut = pd.read_csv("driver_mutations_samples_with_stage_available_fixed.csv", index_col=0)

```

```

cancer_types = ["Breast Invasive Ductal Carcinoma", "Lung Adenocarcinoma", "Lung Squamous
Cell Carcinoma", "Papillary Thyroid Cancer", "Head and Neck Squamous Cell Carcinoma",
"Cutaneous Melanoma", "Bladder Urothelial Carcinoma", "Colon Adenocarcinoma",
"Hepatocellular Carcinoma", "Renal Clear Cell Carcinoma", "Pancreatic Adenocarcinoma", "Breast
Invasive Lobular Carcinoma", "Stomach Adenocarcinoma", "Rectal Adenocarcinoma", "Papillary
Renal Cell Carcinoma"]

```

```

dfs = []
c = -1
for can in cancer_types:
    mut_st = pd.DataFrame(columns=["Cancer Type", "Pool STAGE I", "Pool STAGE II", "Pool
STAGE III", "Pool STAGE IV", "Altered Gene", "STAGE I", "STAGE I (%)", "STAGE II",
"STAGE II (%)", "STAGE III", "STAGE III (%)", "STAGE IV", "STAGE IV (%)", "COS"])

```

```

# "COS" stands for "Change Occurrence per Stage" and represents all the stages
# of a particular cancer type, at which at least one sample identified with
# either a specific driver alteration (for alteration level analysis) or any
# driver mutation at a specific gene (for gene level analysis).

```



```

x = muts[muts["Cancer Type"] == can]
ind = nss[nss["Cancer Type"] == can].index[0]
a = nss.iloc[ind]["Pool STAGE I"]
b = nss.iloc[ind]["Pool STAGE II"]
d = nss.iloc[ind]["Pool STAGE III"]
e = nss.iloc[ind]["Pool STAGE IV"]
new_entry = [can, a, b, d, e]

for gene in list(set(x.Gene)):
    c += 1
    z = x[x.Gene == gene]
    appearances = [gene]

    # Find if the gene is altered or not at each stage and the corresponding
    # stage-specific percentage (%).
    for st in ["I", "II", "III", "IV"]:
        appears = len(z[z["General Stage"] == st])
        # Some stages are not represented by any samples so at these
        # cases the denominator equals to zero, which is mathematically wrong.
        # Format "perc" to two decimal places.
        try:
            perc = appears / len(x[x["General Stage"] == st]) * 100
            formatted_string = "{:.2f}".format(perc)
            perc = float(formatted_string)
        except ZeroDivisionError:
            perc = "not applicable"
        # The binary value of "existence" variable represents the
        # existence (=1) or absence (=0) of a given change in a given stage.
        if appears > 0:
            existence = 1
        elif appears == 0:
            existence = 0
        appearances.append(existence)
        appearances.append(perc)

    # Collect the stages where the gene is altered in at least one sample.
    sts = []
    for binar in [(1, 'STAGE I'), (3, 'STAGE II'), (5, 'STAGE III'), (7, 'STAGE IV')]:
        if appearances[binar[0]] == 1:
            sts.append(binar[1].split()[1])
    sts = ", ".join(sts)
    appearances.append(sts)

    # Collect all the values you want to include in the row that refers
    # to this gene and for the particular cancer type.
    values = []
    for item in [new_entry, appearances]:
        for value in item:
            values.append(value)

    mut_st.loc[c] = values

```

```
dfs.append(mut_st)
```

```
mut_st = pd.concat(dfs).reset_index().drop(columns="index")  
mut_st.to_csv("mutated_genes_per_cancer_type_and_stage.csv")
```

Sort the rows by the occurrence (%) of the alteration (protein alteration or altered gene) at the stage with the highest representation in each cancer type.

```
cd ~\python programming\2
```

```
import pandas as pd
```

```
file_names = ["mutations_per_cancer_type_and_stage.csv",  
"mutated_genes_per_cancer_type_and_stage.csv"]  
cancer_types = ["Breast Invasive Ductal Carcinoma", "Lung Adenocarcinoma", "Lung Squamous  
Cell Carcinoma", "Papillary Thyroid Cancer", "Head and Neck Squamous Cell Carcinoma",  
"Cutaneous Melanoma", "Bladder Urothelial Carcinoma", "Colon Adenocarcinoma",  
"Hepatocellular Carcinoma", "Renal Clear Cell Carcinoma", "Pancreatic Adenocarcinoma", "Breast  
Invasive Lobular Carcinoma", "Stomach Adenocarcinoma", "Rectal Adenocarcinoma", "Papillary  
Renal Cell Carcinoma"]
```

```
for fname in file_names:
```

```
    mut_st = pd.read_csv(fname, index_col=0)
```

```
    dfs = []
```

```
    for can in cancer_types:
```

```
        x = mut_st[mut_st["Cancer Type"] == can]
```

```
        # Sort the rows by the occurrence (%) of the alteration (protein  
        # alteration or altered gene) at the stage with the highest  
        # representation in each cancer type.
```

```
        n_samples = []
```

```
        for col in mut_st.columns[1:5]:
```

```
            # We use the zero but it doesn't matter because all the rows  
            # contain the same numbers at these columns for a particular  
            # cancer type.
```

```
            n_samples.append(x.iloc[0][col])
```

```
        ind = n_samples.index(max(n_samples))
```

```
        # Get rid of the string "Pool " of column name and form the name  
        # of the column we want to sort the rows by.
```

```
        sort_col = mut_st.columns[1:5][ind][5:] + " (%)"
```

```
        x = x.sort_values(by=sort_col, ascending=False)
```

```
        dfs.append(x)
```

```
final_df = pd.concat(dfs).reset_index().drop(columns="index")
```

```
final_df.to_csv(fname[:-4] + "_sorted" + ".csv")
```

Find mutations per stage and cancer type (gene level analysis) FOR ALL CANCER TYPES (includes all 40 types). The results for each cancer type have been sorted by the values of "COS"

column.

```
cd ~\python programming\2
```

```
import pandas as pd
```

```
nss = pd.read_csv("remaining_samples_stage_available_pool.csv", index_col=0)
```

```
muts = pd.read_csv("driver_mutations_samples_with_stage_available_fixed.csv", index_col=0)
```

```
# In our analysis, we exclude the following stages :
```

```
# "STAGE 0" and "STAGE IS" due to lack of samples in the cancer types of interest,
```

```
# "STAGE I/II (NOS)" and "STAGE X" due to the unclear nature of these stages.
```

```
stage_I = ["STAGE I", "STAGE IA", "STAGE IB"]
```

```
stage_II = ["STAGE II", "STAGE IIA", "STAGE IIB", "STAGE IIC"]
```

```
stage_III = ["STAGE III", "STAGE IIIA", "STAGE IIIB", "STAGE IIIC"]
```

```
stage_IV = ["STAGE IV", "STAGE IVA", "STAGE IVB", "STAGE IVC"]
```

```
cancer_types = list(nss["Cancer Type"])
```

```
dfs = []
```

```
c = -1
```

```
for can in cancer_types:
```

```
    mut_st = pd.DataFrame(columns=["Cancer Type", "Pool STAGE I", "Pool STAGE II", "Pool  
STAGE III", "Pool STAGE IV", "Altered Gene", "STAGE I", "STAGE I (%)", "STAGE II",  
"STAGE II (%)", "STAGE III", "STAGE III (%)", "STAGE IV", "STAGE IV (%)", "COS"])
```

```
    # "COS" stands for "Change Occurrence per Stage" and represents all the stages
```

```
    # of a particular cancer type, at which at least one sample identified with
```

```
    # either a specific driver alteration (for alteration level analysis) or any
```

```
    # driver mutation at a specific gene (for gene level analysis).
```

```
    x = muts[muts["Cancer Type"] == can]
```

```
    ind = nss[nss["Cancer Type"] == can].index[0]
```

```
    a = nss.iloc[ind]["Pool STAGE I"]
```

```
    b = nss.iloc[ind]["Pool STAGE II"]
```

```
    d = nss.iloc[ind]["Pool STAGE III"]
```

```
    e = nss.iloc[ind]["Pool STAGE IV"]
```

```
    new_entry = [can, a, b, d, e]
```

```
    for gene in list(set(x.Gene)):
```

```
        c += 1
```

```
        z = x[x.Gene == gene]
```

```
        appearances = [gene]
```

```
    # Find if the gene is altered or not at each stage and the corresponding
```

```
    # stage-specific percentage (%).
```

```
    for st in ["I", "II", "III", "IV"]:
```

```
        # "appears" is the number of samples of a particular cancer type and
```

```
        # a particular stage where a particular gene is mutated.
```

```
        # "n_samples_st_can" is the number of samples of a specific cancer
```

```
        # type that have a disease of a particular stage.
```

```

appears = len(set(z[z["General Stage"] == st][["Sample ID"]]))
n_samples_st_can = len(set(x[x["General Stage"] == st][["Sample ID"]]))
# Some stages are not represented by any samples so at these
# cases the denominator equals to zero, which is mathematically wrong.
# Format "perc" to two decimal places.
try:
    perc = appears / n_samples_st_can * 100
    formatted_string = "{:.2f}".format(perc)
    perc = float(formatted_string)
except ZeroDivisionError:
    perc = "not applicable"
# The binary value of "existence" variable represents the
# existence (=1) or absence (=0) of a given change in a given stage.
if appears > 0:
    existence = 1
elif appears == 0:
    existence = 0
appearances.append(existence)
appearances.append(perc)

# Collect the stages where the gene is altered in at least one sample.
sts = []
for binar in [(1, 'STAGE I'), (3, 'STAGE II'), (5, 'STAGE III'), (7, 'STAGE IV')]:
    if appearances[binar[0]] == 1:
        sts.append(binar[1].split()[1])
sts = ", ".join(sts)
appearances.append(sts)

# Collect all the values you want to include in the row that refers
# to this gene and for the particular cancer type.
values = []
for item in [new_entry, appearances]:
    for value in item:
        values.append(value)

mut_st.loc[c] = values

dfs.append(mut_st.sort_values(by="COS"))

mut_st = pd.concat(dfs).reset_index().drop(columns="index")
mut_st.to_csv("CORRECTED_mutated_genes_per_cancer_type_and_stage_all_cancers.csv")

Find mutations per stage and cancer type (alteration level analysis) FOR ALL CANCER TYPES
(includes all 40 types). The results for each cancer type have been sorted by the values of "COS"
column.

nss = pd.read_csv("remaining_samples_stage_available_pool.csv", index_col=0)
muts = pd.read_csv("driver_mutations_samples_with_stage_available_fixed.csv", index_col=0)

# In our analysis, we exclude the following stages :
# "STAGE 0" and "STAGE IS" due to lack of samples in the cancer types of interest,

```

```
# "STAGE I/II (NOS)" and "STAGE X" due to the unclear nature of these stages.
```

```
stage_I = ["STAGE I", "STAGE IA", "STAGE IB"]
stage_II = ["STAGE II", "STAGE IIA", "STAGE IIB", "STAGE IIC"]
stage_III = ["STAGE III", "STAGE IIIA", "STAGE IIIB", "STAGE IIIC"]
stage_IV = ["STAGE IV", "STAGE IVA", "STAGE IVB", "STAGE IVC"]
```

```
cancer_types = list(nss["Cancer Type"])
```

```
dfs = []
```

```
c = -1
```

```
for can in cancer_types:
```

```
    mut_st = pd.DataFrame(columns=["Cancer Type", "Pool STAGE I", "Pool STAGE II", "Pool  
STAGE III", "Pool STAGE IV", "Change", "STAGE I", "STAGE I (%)", "STAGE II", "STAGE II  
(%)", "STAGE III", "STAGE III (%)", "STAGE IV", "STAGE IV (%)", "COS"])
```

```
    x = muts[muts["Cancer Type"] == can]
```

```
    ind = nss[nss["Cancer Type"] == can].index[0]
```

```
    a = nss.iloc[ind]["Pool STAGE I"]
```

```
    b = nss.iloc[ind]["Pool STAGE II"]
```

```
    d = nss.iloc[ind]["Pool STAGE III"]
```

```
    e = nss.iloc[ind]["Pool STAGE IV"]
```

```
    new_entry = [can, a, b, d, e]
```

```
for change in list(set(x.Change)):
```

```
    c += 1
```

```
    z = x[x.Change == change]
```

```
    appearances = [change]
```

```
    occ = []
```

```
    for st in ["I", "II", "III", "IV"]:
```

```
        # "appears" is the number of samples of a particular cancer type and
```

```
        # a particular stage where a particular mutation is found.
```

```
        # "n_samples_st_can" is the number of samples of a specific cancer
```

```
        # type that have a disease of a particular stage.
```

```
        appears = len(set(z[z["General Stage"] == st]["Sample ID"]))
```

```
        n_samples_st_can = len(set(x[x["General Stage"] == st]["Sample ID"]))
```

```
        # Some stages are not represented by any samples so at these
```

```
        # cases the denominator equals to zero, which is mathematically wrong.
```

```
        # Format "perc" to two decimal places.
```

```
        try:
```

```
            perc = appears / n_samples_st_can * 100
```

```
            formatted_string = "{:.2f}".format(perc)
```

```
            perc = float(formatted_string)
```

```
        except ZeroDivisionError:
```

```
            perc = "not applicable"
```

```
        # The binary value of "existence" variable represents the
```

```
        # existence (=1) or absence (=0) of a given change in a given stage.
```

```
        if appears > 0:
```

```
            existence = 1
```

```
            occ.append(st)
```

```
        elif appears == 0:
```

```
            existence = 0
```

```
        appearances.append(existence)
```

```

        appearances.append(perc)
    # Create a string with all stages where the change occurs in and
    # add it into appearances.
    appearances.append(", ".join(occ))
    values = []
    for item in [new_entry, appearances]:
        for value in item:
            values.append(value)

    mut_st.loc[c] = values
    dfs.append(mut_st.sort_values(by="COS"))

```

```

mut_st = pd.concat(dfs).reset_index().drop(columns="index")
# "COS" stands for "Change Occurrence per Stage" and each character of it
# represents the existence (=1) or absence(=0) of a given change (e.g. BRAF, V600E)
# at the samples examined for a given cancer type (e.g. 0101 means that the change)
# was observed only at stages II and IV and not at stages I and III)
mut_st.to_csv("CORRECTED_mutations_per_cancer_type_and_stage_all_cancers.csv")

```

Isolate only the rows of "mutated\_genes\_per\_cancer\_type\_and\_stage\_all\_cancers.csv" that refer to genes found mutated only in stage I of each cancer.

```
cd ~\python programming\2
```

```
import pandas as pd
```

```

muts = pd.read_csv("CORRECTED_mutated_genes_per_cancer_type_and_stage_all_cancers.csv",
index_col=0)
muts[muts.COS == "I"].drop(columns=["STAGE I", "STAGE II", "STAGE III", "STAGE
IV"]).to_csv("genes_mutated_only_in_stage_I_all_cancers.csv")

```

Program that organizes the information of gene driver alterations at pathway level and visualizes the data (cancer type – cancer stage- altered pathway).

```
cd ~\python programming\2
```

```

import pandas as pd
import numpy as np
import matplotlib.pyplot as plt

```

```
data = pd.read_csv("driver_mutations_samples_with_stage_available_fixed.csv", index_col=0)
```

```

pg = pd.read_csv("all_pathways_drivers_more_complete.csv", index_col=0)

cantypes =
pd.read_csv("CORRECTED_mutated_genes_per_cancer_type_and_stage_all_cancers.csv")

data = data.drop(columns=["Study", "Stage"]).drop(columns=data.columns[6:])
# Keep only the rows where "General Stage" belongs to the list ["I", "II", "III", "IV"]
no_stage_indices = []
for ind in data.index:
    if type(data.iloc[ind]["General Stage"]) == float:
        no_stage_indices.append(ind)
data = data.drop(no_stage_indices).reset_index().drop(columns="index")

data = data[["Cancer Type", "General Stage", "Sample ID", "Gene"]]
data["Pathway"] = None

# Match genes with the pathways they participate in.
for gene in list(pg["Gene"]):
    paths = ", ".join(list(pg[pg.Gene == gene]["Pathway"]))
    for i in list(data[data.Gene == gene].index):
        data.loc[i, "Pathway"] = paths

# With the following block of code we create a list of all our cancer types
# with a specific order : from the type with the most samples to this with the
# less. This happens due to the appropriate order in which registries are placed
# in cantypes.
cancer_types = []
for can in list(cantypes["Cancer Type"]):
    if can not in cancer_types:
        cancer_types.append(can)

# In patients with stage available, no driver mutation was found in TLS and
# Vitamin_cofactor pathways, so we exclude them from the next two variables:
pathways = ["RTK_RAS", "cell_cycle", "p53", "PI3K_Akt", "b_catenin_Wnt", "Notch", "Hippo",
"Myc", "TGFb", "Nrf2", "BER", "NER", "MMR", "FA", "HDR", "NHEJ", "Others_DDR",
"Spliceosome", "Ubq", "Dubq", "Amino_acid", "Carbohydrates", "Energy", "Lipid", "Nucleotide",
"TCA_cycle", "Immunomodulators"]
titles = ["RTK/RAS", "Cell cycle", "p53", "PI3K/Akt", "b catenin/Wnt", "Notch", "Hippo", "Myc",
"TGFb", "Nrf2", "BER", "NER", "MMR", "FA", "HDR", "NHEJ", "Other DDR", "Splicing",
"Ubiquitination", "Deubiquitination", "Amino acids", "Carbohydrates", "Energy", "Lipids",
"Nucleotides", "TCA cycle", "Immunomodulators"]

all_ds_and_titles = []
for cancer in cancer_types:
    x = data[data["Cancer Type"] == cancer].reset_index().drop(columns="index")
    cancer_d = dict()
    c = -1
    for path in pathways:
        c += 1
        indices = []

```

```

for i in x.index:
    if path in x.iloc[i]["Pathway"]:
        indices.append(i)
xp = x.iloc[indices]
# "n_samples_can_path" is the number of samples of a particular cancer
# type that harbor at least one driver mutation in genes of
# a particular signaling pathway.
n_samples_can_path = len(set(xp["Sample ID"]))
if n_samples_can_path == 0:
    continue
else:
    percentages_path = []
    for st in ["I", "II", "III", "IV"]:
        # "appears" is the number of samples of a particular cancer type
        # that harbor at least one driver mutation in genes of a particular
        # signaling pathway and belong to a particular stage of the disease.
        appears = len(set(xp[xp["General Stage"] == st]["Sample ID"]))

        # Some stages are not represented by any samples so at these
        # cases the denominator equals to zero, which is mathematically wrong.
        # Format "perc" to two decimal places.
        try:
            perc = appears / n_samples_can_path * 100
            formatted_string = "{:.2f}".format(perc)
            perc = float(formatted_string)
        except ZeroDivisionError:
            perc = "not applicable"

        percentages_path.append(perc)

    # As key of the new dictionary item, use the pathway name and the
    # respective n_samples_can_path in parenthesis.
    cancer_d[titles[c] + " (n=" + str(n_samples_can_path) + ")"] = percentages_path
all_ds_and_titles.append((cancer, cancer_d))

```

# Plot the data

```
category_names = ["Stage I", "Stage II", "Stage III", "Stage IV"]
```

```

rows = 5
columns = 8
fig, ax = plt.subplots(rows, columns)
fig.set_size_inches(140, 60)

```

```

it = -1
for row in range(rows):
    for col in range(columns):
        it += 1
        title = all_ds_and_titles[it][0]
        results = all_ds_and_titles[it][1]

```



```

labels = list(results.keys())
data = np.array(list(results.values()))
data_cum = data.cumsum(axis=1)
category_colors = plt.get_cmap('RdYlGn')(np.linspace(0.15, 0.85, data.shape[1]))
ax[row][col].invert_yaxis()
ax[row][col].set_xlim(0, np.sum(data, axis=1).max())
# Parameter "pad" refers to the offset of the title from the top of the axes.
ax[row][col].set_title(title, fontweight='bold', fontsize=14, pad=25)

for i, (colname, color) in enumerate(zip(category_names, category_colors)):
    widths = data[:, i]
    starts = data_cum[:, i] - widths
    rects = ax[row][col].barh(labels, widths, left=starts, height=0.5, label=colname, color=color)

    ax[row][col].legend(ncol=len(category_names), bbox_to_anchor=(0, 1), loc='lower left',
        fontsize='small')
plt.savefig("can_paths_stages.pdf")
plt.show()

alldata = pd.DataFrame(columns=["Cancer Type", "Pathway", "n", "Stage I (%)", "Stage II (%)",
    "Stage III (%)", "Stage IV (%)"])
counter = -1
for k in all_ds_and_titles:
    for key in list(k[1].keys()):
        counter += 1
        # "n" is the number of samples of a particular cancer
        # type that harbor at least one driver mutation in genes of
        # a particular signaling pathway.
        n = int(key[:-1].split("=")[1])
        alldata.loc[counter] = [k[0], key.split("(")[0][:-1], n, k[1][key][0], k[1][key][1], k[1][key][2],
            k[1][key][3]]
alldata.to_csv("cancers_paths_stages.csv")

```

Program that organizes the information of gene driver alterations at pathway level and visualizes the data (cancer type – cancer stage- altered pathway). IT SETS A  $n \geq 50$  CUT-OFF FOR THE CANCER TYPE – SIGNALING PATHWAY PAIRS INCLUDED.

```
cd ~\python programming\2
```

```

import pandas as pd
import numpy as np
import matplotlib.pyplot as plt

```

```
data = pd.read_csv("driver_mutations_samples_with_stage_available_fixed.csv", index_col=0)
```

```

pg = pd.read_csv("all_pathways_drivers_more_complete.csv", index_col=0)

cantypes =
pd.read_csv("CORRECTED_mutated_genes_per_cancer_type_and_stage_all_cancers.csv")

data = data.drop(columns=["Study", "Stage"]).drop(columns=data.columns[6:])
# Keep only the rows where "General Stage" belongs to the list ["I", "II", "III", "IV"]
no_stage_indices = []
for ind in data.index:
    if type(data.iloc[ind]["General Stage"]) == float:
        no_stage_indices.append(ind)
data = data.drop(no_stage_indices).reset_index().drop(columns="index")

data = data[["Cancer Type", "General Stage", "Sample ID", "Gene"]]
data["Pathway"] = None

# Match genes with the pathways they participate in.
for gene in list(pg["Gene"]):
    paths = ", ".join(list(pg[pg.Gene == gene]["Pathway"]))
    for i in list(data[data.Gene == gene].index):
        data.loc[i, "Pathway"] = paths

# With the following block of code we create a list of all our cancer types
# with a specific order : from the type with the most samples to this with the
# less. This happens due to the appropriate order in which registries are placed
# in cantypes.
cancer_types = []
for can in list(cantypes["Cancer Type"]):
    if can not in cancer_types:
        cancer_types.append(can)

# In patients with stage available, no driver mutation was found in TLS and
# Vitamin_cofactor pathways, so we exclude them from the next two variables:
pathways = ["RTK_RAS", "cell_cycle", "p53", "PI3K_Akt", "b_catenin_Wnt", "Notch", "Hippo",
"Myc", "TGFb", "Nrf2", "BER", "NER", "MMR", "FA", "HDR", "NHEJ", "Others_DDR",
"Spliceosome", "Ubq", "Dubq", "Amino_acid", "Carbohydrates", "Energy", "Lipid", "Nucleotide",
"TCA_cycle", "Immunomodulators"]
titles = ["RTK/RAS", "Cell cycle", "p53", "PI3K/Akt", "b catenin/Wnt", "Notch", "Hippo", "Myc",
"TGFb", "Nrf2", "BER", "NER", "MMR", "FA", "HDR", "NHEJ", "Other DDR", "Splicing",
"Ubiquitination", "Deubiquitination", "Amino acids", "Carbohydrates", "Energy", "Lipids",
"Nucleotides", "TCA cycle", "Immunomodulators"]

all_ds_and_titles = []
for cancer in cancer_types:
    x = data[data["Cancer Type"] == cancer].reset_index().drop(columns="index")
    cancer_d = dict()
    c = -1
    for path in pathways:
        c += 1
        indices = []

```

```

for i in x.index:
    if path in x.iloc[i]["Pathway"]:
        indices.append(i)
xp = x.iloc[indices]
# "n_samples_can_path" is the number of samples of a particular cancer
# type that harbor at least one driver mutation in genes of
# a particular signaling pathway.
n_samples_can_path = len(set(xp["Sample ID"]))
if n_samples_can_path < 50:
    continue
else:
    percentages_path = []
    for st in ["I", "II", "III", "IV"]:
        # "appears" is the number of samples of a particular cancer type
        # that harbor at least one driver mutation in genes of a particular
        # signaling pathway and belong to a particular stage of the disease.
        appears = len(set(xp[xp["General Stage"] == st]["Sample ID"]))

        # Format "perc" to two decimal places.
        perc = appears / n_samples_can_path * 100
        formatted_string = "{:.2f}".format(perc)
        perc = float(formatted_string)

        percentages_path.append(perc)

    # As key of the new dictionary item, use the pathway name and the
    # respective n_samples_can_path in parenthesis.
    cancer_d[titles[c] + " (n=" + str(n_samples_can_path) + ")"] = percentages_path
# Retain only cancer types for which there is at least one pathway altered
# via driver mutation in at least 50 samples.
if len(cancer_d.keys()) > 0:
    all_ds_and_titles.append((cancer, cancer_d))

```

# Plot the data

```
category_names = ["Stage I", "Stage II", "Stage III", "Stage IV"]
```

```

rows = 3
columns = 6
fig, ax = plt.subplots(rows, columns)
fig.set_size_inches(140, 60)

```

```

it = -1
for row in range(rows):
    for col in range(columns):
        it += 1
        title = all_ds_and_titles[it][0]
        results = all_ds_and_titles[it][1]

```

```
labels = list(results.keys())
```

```

data = np.array(list(results.values()))
data_cum = data.cumsum(axis=1)
category_colors = plt.get_cmap('RdYlGn')(np.linspace(0.15, 0.85, data.shape[1]))
ax[row][col].invert_yaxis()
ax[row][col].set_xlim(0, np.sum(data, axis=1).max())
# Parameter "pad" refers to the offset of the title from the top of the axes.
ax[row][col].set_title(title, fontweight='bold', fontsize=30, pad=35)

for i, (colname, color) in enumerate(zip(category_names, category_colors)):
    widths = data[:, i]
    starts = data_cum[:, i] - widths
    rects = ax[row][col].barh(labels, widths, left=starts, height=0.5, label=colname, color=color)

    ax[row][col].legend(ncol=len(category_names), bbox_to_anchor=(0, 1), loc='lower left',
        fontsize='medium')
plt.savefig("can_paths_stages_n_at_least_50.pdf")
plt.show()

```

IN ORDER TO SET THE CUT-OFF EQUAL TO 20 :

INSTEAD OF:

if n\_samples\_can\_path < 50:

YOU TYPE:

if n\_samples\_can\_path < 20:

THEN, YOU WILL HAVE INFORMATION FOR 25 PAIRS, SO:

INSTEAD OF:

rows = 3

columns = 6

YOU TYPE:

rows = 5

columns = 5

IN ORDER TO APPLY THE ANALYSIS ONLY AT THE 10 PATHWAYS WE HAVE CHOSEN,  
THEN WE JUST HAVE TO REPLACE :

```

pathways = ["RTK_RAS", "cell_cycle", "p53", "PI3K_Akt", "b_catenin_Wnt", "Notch", "Hippo",
    "Myc", "TGFb", "Nrf2", "BER", "NER", "MMR", "FA", "HDR", "NHEJ", "Others_DDR",
    "Spliceosome", "Ubq", "Dubq", "Amino_acid", "Carbohydrates", "Energy", "Lipid", "Nucleotide",
    "TCA_cycle", "Immunomodulators"]
titles = ["RTK/RAS", "Cell cycle", "p53", "PI3K/Akt", "b catenin/Wnt", "Notch", "Hippo", "Myc",
    "TGFb", "Nrf2", "BER", "NER", "MMR", "FA", "HDR", "NHEJ", "Other DDR", "Splicing",
    "Ubiquitination", "Deubiquitination", "Amino acids", "Carbohydrates", "Energy", "Lipids",
    "Nucleotides", "TCA cycle", "Immunomodulators"]

```

WITH :

```
pathways = ["RTK_RAS", "cell_cycle", "p53", "PI3K_Akt", "b_catenin_Wnt", "Notch", "HDR",  
"Spliceosome", "Ubq", "Lipid"]  
titles = ["RTK/RAS", "Cell cycle", "p53", "PI3K/Akt", "b catenin/Wnt", "Notch", "HDR",  
"Splicing", "Ubiquitination", "Lipids"]
```

ALSO, IN ORDER TO CALCULATE THE PERCENTAGE OF SAMPLES OF EACH CANCER TYPE THAT HARBOR DRIVER MUTATION/S IN EACH PATHWAY AND ALSO ADD THIS INFORMATION INTO THE GRAPH, WE REPLACE :

```
all_ds_and_titles = []  
for cancer in cancer_types:  
    x = data[data["Cancer Type"] == cancer].reset_index().drop(columns="index")  
    cancer_d = dict()  
    c = -1  
    for path in pathways:  
        c += 1  
        indices = []  
        for i in x.index:  
            if path in x.iloc[i]["Pathway"]:  
                indices.append(i)  
        xp = x.iloc[indices]  
        # "n_samples_can_path" is the number of samples of a particular cancer  
        # type that harbor at least one driver mutation in genes of  
        # a particular signaling pathway.  
        n_samples_can_path = len(set(xp["Sample ID"]))  
        if n_samples_can_path < 50:  
            continue  
        else:  
            percentages_path = []  
            for st in ["I", "II", "III", "IV"]:  
                # "appears" is the number of samples of a particular cancer type  
                # that harbor at least one driver mutation in genes of a particular  
                # signaling pathway and belong to a particular stage of the disease.  
                appears = len(set(xp[xp["General Stage"] == st]["Sample ID"]))  
  
                # Format "perc" to two decimal places.  
                perc = appears / n_samples_can_path * 100  
                formatted_string = "{:.2f}".format(perc)  
                perc = float(formatted_string)  
  
                percentages_path.append(perc)  
  
            # As key of the new dictionary item, use the pathway name and the  
            # respective n_samples_can_path in parenthesis.  
            cancer_d[titles[c] + " (n=" + str(n_samples_can_path) + ")"] = percentages_path
```

```
# Retain only cancer types for which there is at least one pathway altered
# via driver mutation in at least 50 samples.
if len(cancer_d.keys()) > 0:
    all_ds_and_titles.append((cancer, cancer_d))
```

WITH :

```
all_ds_and_titles = []
for cancer in cancer_types:
    x = data[data["Cancer Type"] == cancer].reset_index().drop(columns="index")
    # n_samples_can is the number of samples of a particular cancer type for
    # which there are driver mutational data for the genes of our interest.
    n_samples_can = len(set(x["Sample ID"]))
    cancer_d = dict()
    c = -1
    for path in pathways:
        c += 1
        indices = []
        for i in x.index:
            if path in x.iloc[i]["Pathway"]:
                indices.append(i)
        xp = x.iloc[indices]
        # "n_samples_can_path" is the number of samples of a particular cancer
        # type that harbor at least one driver mutation in genes of
        # a particular signaling pathway.
        n_samples_can_path = len(set(xp["Sample ID"]))

        # psdmp is the percent of samples of a particular cancer type that
        # harbor at least one driver mutation in genes of a particular
        # signaling pathway.
        psdmp = n_samples_can_path / n_samples_can * 100
        form_str = "{:.2f}".format(psdmp)
        psdmp = float(form_str)
        if n_samples_can_path < 20:
            continue
        else:
            percentages_path = []
            for st in ["I", "II", "III", "IV"]:
                # "appears" is the number of samples of a particular cancer type
                # that harbor at least one driver mutation in genes of a particular
                # signaling pathway and belong to a particular stage of the disease.
                appears = len(set(xp[xp["General Stage"] == st]["Sample ID"]))

                # Format "perc" to two decimal places.
                perc = appears / n_samples_can_path * 100
                formatted_string = "{:.2f}".format(perc)
                perc = float(formatted_string)

                percentages_path.append(perc)
```

```

        # As key of the new dictionary item, use the pathway name and the
        # respective n_samples_can_path in parenthesis.
        cancer_d[titles[c] + " (n=" + str(n_samples_can_path) + ", " + str(psdmp) + " %)"] =
percentages_path
    # Retain only cancer types for which there is at least one pathway altered
    # via driver mutation in at least 20 samples.
    if len(cancer_d.keys()) > 0:
        all_ds_and_titles.append((cancer, cancer_d))

```

Program that organizes the information of gene driver alterations at pathway level and visualizes the data (cancer type – cancer stage – altered pathway). IT SETS A  $n \geq 20$  CUT-OFF FOR THE CANCER TYPE – SIGNALING PATHWAY PAIRS INCLUDED AND IT COMPRISES ONE MORE INFORMATION : THE PERCENTAGE OF SAMPLES OF EACH CANCER TYPE (AMONG THE SAMPLES FOR WHICH THE DISEASE STAGE IS AVAILABLE), THAT HARBOR DRIVER MUTATIONS IN EACH PATHWAY. Also, the percentage of every sub-bar is shown.

```

cd C:\Users\User\Desktop\ARXEIO-1-9-2021\Paper E.I.E\ΔΙΚΕΣ ΜΟΥ ΑΝΑΖΗΤΗΣΕΙΣ\python
programming\2\driver mutations of our 340 cancer genes

```

```

import pandas as pd
import numpy as np
import matplotlib.pyplot as plt

```

```

all_driver = pd.read_csv("driver_mutations_for_204_cancer_genes.csv", index_col=0)
all_driver.insert(loc=1, column="Pathways", value=None)

```

```

cd C:\Users\User\Desktop\ARXEIO-1-9-2021\Paper E.I.E\ΔΙΚΕΣ ΜΟΥ ΑΝΑΖΗΤΗΣΕΙΣ\python
programming\2

```

```

pg = pd.read_csv("all_pathways_drivers_more_complete.csv", index_col=0)

```

```

data = pd.read_csv("driver_mutations_samples_with_stage_available_fixed.csv", index_col=0)

```

```

cantypes =
pd.read_csv("CORRECTED_mutated_genes_per_cancer_type_and_stage_all_cancers.csv")

```

```

data = data.drop(columns=["Study", "Stage"]).drop(columns=data.columns[6:])

```

```

# Keep only the rows where "General Stage" is available (for an unknown
# reason, there are still some rows without stage, even after the first
# cleaning attempt, so we have to clean the data one more time).

```

```

no_stage_indices = []

```

```

for ind in data.index:

```

```

    if type(data.iloc[ind]["General Stage"]) == float:

```

```

        no_stage_indices.append(ind)

```

```

data = data.drop(no_stage_indices).reset_index().drop(columns="index")

```

```

data = data[["Cancer Type", "General Stage", "Sample ID", "Gene"]]
data["Pathway"] = None

```

```

# Match genes with the pathways they participate in.
for gene in list(pg["Gene"]):
    paths = ", ".join(list(pg[pg.Gene == gene]["Pathway"]))
    for file, colpath in [(data, "Pathway"), (all_driver, "Pathways")]:
        for i in list(file[file.Gene == gene].index):
            file.loc[i, colpath] = paths

# With the following block of code we create a list of all our cancer types
# with a specific order : from the type with the most samples to this with the
# less. This happens due to the appropriate order in which registries are placed
# in cantypes.
cancer_types = []
for can in list(cantypes["Cancer Type"]):
    if can not in cancer_types:
        cancer_types.append(can)

# In patients with stage available, no driver mutation was found in TLS and
# Vitamin_cofactor pathways, so we exclude them from the next two variables:
pathways = ["RTK_RAS", "cell_cycle", "p53", "PI3K_Akt", "b_catenin_Wnt", "Notch", "Hippo",
"Myc", "TGFb", "Nrf2", "BER", "NER", "MMR", "FA", "HDR", "NHEJ", "Others_DDR",
"Spliceosome", "Ubq", "Dubq", "Amino_acid", "Carbohydrates", "Energy", "Lipid", "Nucleotide",
"TCA_cycle", "Immunomodulators"]
titles = ["RTK/RAS", "Cell cycle", "p53", "PI3K/Akt", "b catenin/Wnt", "Notch", "Hippo", "Myc",
"TGFb", "Nrf2", "BER", "NER", "MMR", "FA", "HDR", "NHEJ", "Other DDR", "Splicing",
"Ubiquitination", "Deubiquitination", "Amino acids", "Carbohydrates", "Energy", "Lipids",
"Nucleotides", "TCA cycle", "Immunomodulators"]

all_ds_and_titles = []
for cancer in cancer_types:
    x = data[data["Cancer Type"] == cancer].reset_index().drop(columns="index")
    # n_samples_can is the total number of samples of a particular cancer type
    # that harbor at least one driver mutation in at least one of our 204 genes
    # of interest and their stage is available (samples from TCGA PanCancer Atlas
    # studies).
    n_samples_can = len(set(x["Sample ID"]))
    cancer_d = dict()
    c = -1
    for path in pathways:
        c += 1
        indices = []
        for i in x.index:
            if path in x.iloc[i]["Pathway"]:
                indices.append(i)
        xp = x.iloc[indices]
        # "n_samples_can_path_st" is the number of samples of a particular cancer
        # type that harbor at least one driver mutation in genes of
        # a particular signaling pathway and their disease stage is available.
        n_samples_can_path_st = len(set(xp["Sample ID"]))

        if n_samples_can_path_st < 20:
            continue

```



else:

```
# pdm is the percentage of samples of a particular cancer
# type that harbor at least one driver mutation in genes of
# a particular signaling pathway and their disease stage is available.
pdm = n_samples_can_path_st / n_samples_can * 100
form_str = "{:.2f}".format(pdm)
pdm = float(form_str)
percentages_path = []
for st in ["I", "II", "III", "IV"]:
    # "appears" is the number of samples of a particular cancer type
    # that harbor at least one driver mutation in genes of a particular
    # signaling pathway and belong to a particular stage of the disease.
    appears = len(set(xp[xp["General Stage"] == st]["Sample ID"]))
```

```
# Format "perc" to two decimal places.
perc = appears / n_samples_can_path_st * 100
formatted_string = "{:.2f}".format(perc)
perc = float(formatted_string)
```

```
percentages_path.append(perc)
```

```
# As key of the new dictionary item, use the pathway name and the
# respective n_samples_can_path_st in parenthesis.
cancer_d[titles[c] + " (N=" + str(n_samples_can_path_st) + ", pdm=" + str(pdm) + " %)"] =
```

percentages\_path

```
# Retain only cancer types for which there is at least one pathway altered
# via driver mutation in at least 20 samples.
```

```
if len(cancer_d.keys()) > 0:
```

```
    titl = cancer + " (N=" + str(n_samples_can) + ")"
```

```
    if len(cancer_d.keys()) == 1:
```

```
        all_ds_and_titles.append((titl, cancer_d))
```

```
    elif len(cancer_d.keys()) > 1:
```

```
        # sort cancer_d items by pdm in order to show the bars of the graph
```

```
        # in a descending pdm order.
```

```
        pn = []
```

```
        for k in cancer_d.keys():
```

```
            pn.append((k.split("pdm=")[0], float(k.split("pdm=")[1][:-3])))
```

```
        cancer_d_sorted = {}
```

```
        # key = lambda x: x[1] ensures the classification will take place
```

```
        # using the second item of each tuple of the list.
```

```
        for s in sorted(pn, key = lambda x: x[1], reverse=True):
```

```
            for ke in cancer_d.keys():
```

```
                if s[0] in ke:
```

```
                    cancer_d_sorted[ke] = cancer_d[ke]
```

```
                    break
```

```
        all_ds_and_titles.append((titl, cancer_d_sorted))
```

```
# Plot the data
```

```
category_names = ["Stage I", "Stage II", "Stage III", "Stage IV"]
```

```

rows = 5
columns = 5
fig, ax = plt.subplots(rows, columns)
fig.set_size_inches(140, 60)

it = -1
for row in range(rows):
    for col in range(columns):
        it += 1
        title = all_ds_and_titles[it][0]
        results = all_ds_and_titles[it][1]

        labels = list(results.keys())
        data = np.array(list(results.values()))
        data_cum = data.cumsum(axis=1)
        category_colors = plt.get_cmap('RdYlGn')(np.linspace(0.15, 0.85, data.shape[1]))
        ax[row][col].invert_yaxis()
        ax[row][col].set_xlim(0, np.sum(data, axis=1).max())
        # Parameter "pad" refers to the offset of the title from the top of the axes.
        ax[row][col].set_title(title, fontweight='bold', fontsize=30, pad=35)

        for i, (colname, color) in enumerate(zip(category_names, category_colors)):
            widths = data[:, i]
            starts = data_cum[:, i] - widths
            rects = ax[row][col].barh(labels, widths, left=starts, height=0.5, label=colname, color=color)

            r, g, b, _ = color
            text_color = 'white' if r * g * b < 0.5 else 'darkgrey'
            ax[row][col].bar_label(rects, label_type='center', color=text_color, fontsize=10)

        ax[row][col].legend(ncol=len(category_names), bbox_to_anchor=(0, 1), loc='lower left',
            fontsize=10)
plt.savefig("CORRECTED_can_paths_stages_n_at_least_20_with_percent_sorted.pdf")
plt.show()

```

Import clinical data that refer to patients profiled for their mutations and keep only entries referring to samples originating from primary tumors (not recurrences or metastases). Also, for each entry, add the general stage at which the corresponding sample belongs to.

```
cd ~\python programming\2
```

```
import pandas as pd
```

```
all_clin = pd.read_csv("clinical_data_of_samples_profiled_for_their_mutations.tsv", sep="\t")
```

```

for t in list(set(all_clin["Sample Type"])):
    print(t, len(all_clin[all_clin["Sample Type"] == t]), "\n")
    # The result is : Recurrence --> 9 samples, Primary --> 10066 samples and

```

```

# Metastasis --> 364 samples

# Keep only data referring to primary tumors.
all_clin = all_clin[all_clin["Sample Type"] == "Primary"].reset_index().drop(columns="index")

# Ensure that there are no multiple entries for the patients.
len(all_clin) == len(set(all_clin["Patient ID"]))

stage_IS = ["STAGE IS"]
stage_I = ["STAGE I", "STAGE IA", "STAGE IB"]
stage_II = ["STAGE II", "STAGE IIA", "STAGE IIB", "STAGE IIC"]
stage_III = ["STAGE III", "STAGE IIIA", "STAGE IIIB", "STAGE IIIC"]
stage_IV = ["STAGE IV", "STAGE IVA", "STAGE IVB", "STAGE IVC"]
stage_X = ["STAGE X"]

stages = [("IS", stage_IS), ("I", stage_I), ("II", stage_II), ("III", stage_III), ("IV", stage_IV), ("X",
stage_X)]

all_clin.insert(loc=5, column="General Stage", value="")

for i in range(len(all_clin)):
    x = all_clin.iloc[i]["Neoplasm Disease Stage American Joint Committee on Cancer Code"]
    for z in range(len(stages)):
        if x in stages[z][1]:
            all_clin.loc[i, "General Stage"] = stages[z][0]

cd ~\python programming\3
all_clin.to_csv("clinical_data_of_samples_profiled_for_their_mutations_and_from_primary_origin
.csv")

```

Create a file containing driver mutations for our 204 genes of interest, but only for patients included to the new dataset as this was set in the previous program.

```

cd ~\python programming\2

drivmut = pd.read_csv("driver_mutations_for_204_cancer_genes_includes_pathways.csv",
index_col=0)

cd ~\python programming\3

import pandas as pd

all_clin =
pd.read_csv("clinical_data_of_samples_profiled_for_their_mutations_and_from_primary_origin.cs
v", index_col=0)

```

```

# From "driver_mutations_for_204_cancer_genes_includes_pathways.csv", keep only
# entries referring to samples included in
# "clinical_data_of_samples_profiled_for_their_mutations_and_from_primary_origin.csv"
indices = []
for ID in list(set(all_clin["Sample ID"])):
    if ID in list(set(drivmuts["Sample ID"])):
        for ind in drivmuts[drivmuts["Sample ID"] == ID].index:
            indices.append(ind)
drivmuts = drivmuts.iloc[indices].reset_index().drop(columns="index")
drivmuts.to_csv("driver_mutations_for_204_cancer_genes_includes_pathways_new_dataset_primary_tumors.csv")

```

Choose only cancer types for which there are at least 50 samples (=patients, because of the 1:1 ratio) available in our new dataset, find the proportion of driver mutation existence for each signaling pathway and create a heatmap in order to visualize the findings.

```
cd ~\python programming\3
```

```

import pandas as pd
import numpy as np
import matplotlib.pyplot as plt

```

```

drivmuts =
pd.read_csv("driver_mutations_for_204_cancer_genes_includes_pathways_new_dataset_primary_tumors.csv", index_col=0)
clinical_data =
pd.read_csv("clinical_data_of_samples_profiled_for_their_mutations_and_from_primary_origin.csv", index_col=0)

```

```

freq = []
for ct in list(set(drivmuts["Cancer Type"])):
    freq.append((ct, len(set(drivmuts[drivmuts["Cancer Type"] == ct]["Sample ID"]))))
freq = sorted(freq, key = lambda x: x[1], reverse=True)

```

```
# Keep only cancer types with at least 50 samples (and therefore patients) available.
```

```

cancers = []
cancer_labels = []
for p in freq:
    if p[1] >= 50:
        cancers.append(p[0])
        cancer_labels.append(p[0] + " (n=" + str(p[1]) + ")")

```

```

# Isolate the useful piece of drivmuts (the one that contains only cancers with
# at least 50 available samples).

```

```

indices = []
for cancer in cancers:
    for ind in drivmuts[drivmuts["Cancer Type"] == cancer].index:

```

```

indices.append(ind)
drivmut = drivmut.iloc[indices].reset_index().drop(columns="index")

# Find all the pathways implicated via driver mutation at the selected cancers.
# For each pathway, find also the number of samples affected in order to sort
# the pathways by it.
pathways = []
for path in list(set(drivmut.Pathways)):
    for path in paths.split(" "):
        if path not in pathways:
            samples = []
            for IND in drivmut.index:
                if path in drivmut.iloc[IND]["Pathways"]:
                    if drivmut.iloc[IND]["Sample ID"] not in samples:
                        samples.append(drivmut.iloc[IND]["Sample ID"])
            pathways.append((path, len(samples)))
# For some reason, in "pathways" there are more than one copies of each entry,
# so we have to fix this.
pathways = list(set(pathways))
pathways = sorted(pathways, key = lambda x: x[1], reverse=True)
paths_collection, junk = zip(*pathways)

cascades = ["RTK_RAS", "cell_cycle", "p53", "PI3K_Akt", "b_catenin_Wnt", "Notch", "Hippo",
"Myc", "TGFb", "Nrf2", "BER", "NER", "MMR", "FA", "HDR", "NHEJ", "Others_DDR",
"Spliceosome", "Ubq", "Dubq", "Amino_acid", "Carbohydrates", "Energy", "Lipid", "Nucleotide",
"TCA_cycle", "Immunomodulators"]
titles = ["RTK/RAS", "Cell cycle", "p53", "PI3K/Akt", "b catenin/Wnt", "Notch", "Hippo", "Myc",
"TGFb", "Nrf2", "BER", "NER", "MMR", "FA", "HDR", "NHEJ", "Other DDR", "Splicing",
"Ubiquitination", "Deubiquitination", "Amino acids", "Carbohydrates", "Energy", "Lipids",
"Nucleotides", "TCA cycle", "Immunomodulators"]

pathway_labels = []
for entry in pathways:
    pathway_labels.append(titles[cascades.index(entry[0])])

# Build our data
data_list = []
for can in cancers:
    x = drivmut[drivmut["Cancer Type"] == can].reset_index().drop(columns="index")
    # n_samples_can is the number of samples (= patients) that are profiled
    # for their mutations, originate from primary tumor site and refer to a
    # particular cancer type.
    n_samples_can = len(set(clinical_data[clinical_data["Cancer Type Detailed"] == can]["Sample
ID"])))
    csl = []
    for cascade in paths_collection:
        inds = []
        for i in x.index:
            if cascade in x.iloc[i]["Pathways"]:
                inds.append(i)

```

```

# n_samples_can_path is the number of samples (= patients) that are
# profiled for their mutations, originate from primary tumor site,
# refer to a particular cancer type and are altered via driver
# mutation in a particular pathway.
n_samples_can_path = len(set(x.iloc[inds]["Sample ID"]))

# Format "perc" to two decimal places.
perc = n_samples_can_path / n_samples_can * 100
formatted_string = "{:.2f}".format(perc)
perc = float(formatted_string)
csl.append(perc)
data_list.append(csl)
data = np.array(data_list)

# Plot the data
def heatmap(data, row_labels, col_labels, ax=None,
            cbar_kw={}, cbarlabel="", **kwargs):
    """
    Create a heatmap from a numpy array and two lists of labels.

    Parameters
    -----
    data
        A 2D numpy array of shape (N, M).
    row_labels
        A list or array of length N with the labels for the rows.
    col_labels
        A list or array of length M with the labels for the columns.
    ax
        A `matplotlib.axes.Axes` instance to which the heatmap is plotted. If
        not provided, use current axes or create a new one. Optional.
    cbar_kw
        A dictionary with arguments to `matplotlib.figure.colorbar`. Optional.
    cbarlabel
        The label for the colorbar. Optional.
    **kwargs
        All other arguments are forwarded to `imshow`.
    """

    if not ax:
        ax = plt.gca()

    # Plot the heatmap
    im = ax.imshow(data, **kwargs)

    # Create colorbar
    cbar = ax.figure.colorbar(im, ax=ax, **cbar_kw)
    cbar.ax.set_ylabel(cbarlabel, rotation=-90, va="bottom")

    # We want to show all ticks...
    ax.set_xticks(np.arange(data.shape[1]))

```

```

ax.set_yticks(np.arange(data.shape[0]))
# ... and label them with the respective list entries.
ax.set_xticklabels(col_labels)
ax.set_yticklabels(row_labels)

# Let the horizontal axes labeling appear on top.
ax.tick_params(top=True, bottom=False,
               labeltop=True, labelbottom=False)

# Rotate the tick labels and set their alignment.
plt.setp(ax.get_xticklabels(), rotation=-55, ha="right",
         rotation_mode="anchor")

# Turn spines off and create white grid.
ax.spines[:].set_visible(False)

ax.set_xticks(np.arange(data.shape[1]+1)-.5, minor=True)
ax.set_yticks(np.arange(data.shape[0]+1)-.5, minor=True)
ax.grid(which="minor", color="w", linestyle='-', linewidth=3)
ax.tick_params(which="minor", bottom=False, left=False)

return im, cbar

```

```

def annotate_heatmap(im, data=None, valfmt="{x:.2f}",
                    textcolors=("black", "white"),
                    threshold=None, **textkw):
    """

```

A function to annotate a heatmap.

Parameters

-----

`im`

The AxesImage to be labeled.

`data`

Data used to annotate. If None, the image's data is used. Optional.

`valfmt`

The format of the annotations inside the heatmap. This should either use the string format method, e.g. "\$ {x:.2f}", or be a ``matplotlib.ticker.Formatter``. Optional.

`textcolors`

A pair of colors. The first is used for values below a threshold, the second for those above. Optional.

`threshold`

Value in data units according to which the colors from `textcolors` are applied. If None (the default) uses the middle of the colormap as separation. Optional.

`**kwargs`

All other arguments are forwarded to each call to ``text`` used to create the text labels.

"""

```

if not isinstance(data, (list, np.ndarray)):
    data = im.get_array()

# Normalize the threshold to the images color range.
if threshold is not None:
    threshold = im.norm(threshold)
else:
    threshold = im.norm(data.max())/2.

# Set default alignment to center, but allow it to be
# overwritten by textkw.
kw = dict(horizontalalignment="center",
            verticalalignment="center")
kw.update(textkw)

# Get the formatter in case a string is supplied
if isinstance(valfmt, str):
    valfmt = matplotlib.ticker.StrMethodFormatter(valfmt)

# Loop over the data and create a `Text` for each "pixel".
# Change the text's color depending on the data.
texts = []
for i in range(data.shape[0]):
    for j in range(data.shape[1]):
        kw.update(color=textcolors[int(im.norm(data[i, j]) > threshold)])
        text = im.axes.text(j, i, valfmt(data[i, j], None), **kw)
        texts.append(text)

return texts

fig, ax = plt.subplots()
fig.set_size_inches(10, 8)

im, cbar = heatmap(data, cancer_labels, pathway_labels, ax=ax, cmap="YlGn", cbarlabel="Driver
mutational rate (%)")
texts = annotate_heatmap(im, valfmt="{x:.2f}")

fig.tight_layout()
plt.show()

```

Make the same things as at the previous 3 programs, but this time for metastatic samples. Here, there is only one cancer type to deal with (Cutaneous Melanoma), so we make our visualization in the context of comparison of primary versus metastatic samples in terms of signaling pathways' driver mutations.

```
cd ~\python programming\2
```



```

import pandas as pd
import numpy as np
import matplotlib.pyplot as plt

all_clin = pd.read_csv("clinical_data_of_samples_profiled_for_their_mutations.tsv", sep="\t")
drivmut = pd.read_csv("driver_mutations_for_204_cancer_genes_includes_pathways.csv",
index_col=0)

for t in list(set(all_clin["Sample Type"])):
    print(t, len(all_clin[all_clin["Sample Type"] == t]), "\n")
    # The result is : Recurrence --> 9 samples, Primary --> 10066 samples and
    # Metastasis --> 364 samples

# Keep only data referring to metastatic tumors.
all_clin = all_clin[all_clin["Sample Type"] == "Metastasis"].reset_index().drop(columns="index")

# Ensure that there are no multiple entries for the patients.
len(all_clin) == len(set(all_clin["Patient ID"]))

stage_IS = ["STAGE IS"]
stage_I = ["STAGE I", "STAGE IA", "STAGE IB"]
stage_II = ["STAGE II", "STAGE IIA", "STAGE IIB", "STAGE IIC"]
stage_III = ["STAGE III", "STAGE IIIA", "STAGE IIIB", "STAGE IIIC"]
stage_IV = ["STAGE IV", "STAGE IVA", "STAGE IVB", "STAGE IVC"]
stage_X = ["STAGE X"]

stages = [("IS", stage_IS), ("I", stage_I), ("II", stage_II), ("III", stage_III), ("IV", stage_IV), ("X",
stage_X)]

all_clin.insert(loc=5, column="General Stage", value="")

for i in range(len(all_clin)):
    x = all_clin.iloc[i]["Neoplasm Disease Stage American Joint Committee on Cancer Code"]
    for z in range(len(stages)):
        if x in stages[z][1]:
            all_clin.loc[i, "General Stage"] = stages[z][0]

cd ~\python programming\3
all_clin.to_csv("clinical_data_of_samples_profiled_for_their_mutations_and_from_metastatic_ori
gin.csv")

# From "driver_mutations_for_204_cancer_genes_includes_pathways.csv", keep only
# entries referring to samples included in
# "clinical_data_of_samples_profiled_for_their_mutations_and_from_metastatic_origin.csv"
indices = []
for ID in list(set(all_clin["Sample ID"])):
    if ID in list(set(drivmut["Sample ID"])):
        for ind in drivmut[drivmut["Sample ID"] == ID].index:

```

```

        indices.append(ind)
drivmuts = drivmuts.iloc[indices].reset_index().drop(columns="index")
drivmuts.to_csv("driver_mutations_for_204_cancer_genes_includes_pathways_new_dataset_metastatic_tumors.csv")

```

```

freq = []
for ct in list(set(drivmuts["Cancer Type"])):
    freq.append((ct, len(set(drivmuts[drivmuts["Cancer Type"] == ct]["Sample ID"]))))
freq = sorted(freq, key = lambda x: x[1], reverse=True)
# From the above, it arises that there are data for 2 metastatic cancer types:
# Cutaneous Melanoma (352 samples) and Papillary Thyroid Cancer (1 sample). So,
# from now on, we will focus on Cutaneous Melanoma.
freq.pop()

```

```

drivmuts_prim =
pd.read_csv("driver_mutations_for_204_cancer_genes_includes_pathways_new_dataset_primary_tumors.csv", index_col=0)
freq.append((freq[0][0], len(set(drivmuts_prim[drivmuts_prim["Cancer Type"] == freq[0][0]]["Sample ID"]))))

```

```

can = freq[0][0]
cancer_labels = []
c = 0
for p in freq:
    if c == 0:
        cancer_labels.append("Metastatic " + p[0] + " (n=" + str(p[1]) + ")")
    else:
        cancer_labels.append("Primary " + p[0] + " (n=" + str(p[1]) + ")")
    c += 1

```

# Isolate the piece of drivmuts and drivmuts\_prim that contains Cutaneous Melanoma.

```

drivmuts = drivmuts.iloc[drivmuts[drivmuts["Cancer Type"] == can].index].reset_index().drop(columns="index")
drivmuts_prim = drivmuts_prim.iloc[drivmuts_prim[drivmuts_prim["Cancer Type"] == can].index].reset_index().drop(columns="index")

```

```

# Find all the pathways implicated via driver mutation at the selected cancers
# (metastatic and primary Cutaneous Melanoma). For each pathway, find also the
# number of samples affected in order to sort the pathways by it.
mix = pd.concat([drivmuts, drivmuts_prim]).reset_index().drop(columns="index")
pathways = []
for paths in list(set(mix.Pathways)):
    for path in paths.split(", "):
        if path not in pathways:
            samples = []
            for IND in mix.index:
                if path in mix.iloc[IND]["Pathways"]:

```

```

        if mix.iloc[IND]["Sample ID"] not in samples:
            samples.append(mix.iloc[IND]["Sample ID"])
        pathways.append((path, len(samples)))
# For some reason, in "pathways" there are more than one copies of each entry,
# so we have to fix this.
pathways = list(set(pathways))
pathways = sorted(pathways, key = lambda x: x[1], reverse=True)
paths_collection, junk = zip(*pathways)

cascades = ["RTK_RAS", "cell_cycle", "p53", "PI3K_Akt", "b_catenin_Wnt", "Notch", "Hippo",
"Myc", "TGFb", "Nrf2", "BER", "NER", "MMR", "FA", "HDR", "NHEJ", "Others_DDR",
"Spliceosome", "Ubq", "Dubq", "Amino_acid", "Carbohydrates", "Energy", "Lipid", "Nucleotide",
"TCA_cycle", "Immunomodulators"]
titles = ["RTK/RAS", "Cell cycle", "p53", "PI3K/Akt", "b catenin/Wnt", "Notch", "Hippo", "Myc",
"TGFb", "Nrf2", "BER", "NER", "MMR", "FA", "HDR", "NHEJ", "Other DDR", "Splicing",
"Ubiquitination", "Deubiquitination", "Amino acids", "Carbohydrates", "Energy", "Lipids",
"Nucleotides", "TCA cycle", "Immunomodulators"]

pathway_labels = []
for entry in pathways:
    pathway_labels.append(titles[cascades.index(entry[0])])

all_clin_prim =
pd.read_csv("clinical_data_of_samples_profiled_for_their_mutations_and_from_primary_origin.csv")

# Build our data
data_list = []
for x, y in [(drivmut, all_clin), (drivmut_prim, all_clin_prim)]:
    # n_samples_can is the number of samples (= patients) that are profiled
    # for their mutations, originate from primary tumor site and refer to a
    # particular cancer type.
    n_samples_can = len(set(y[y["Cancer Type Detailed"] == can]["Sample ID"]))
    csl = []
    for cascade in paths_collection:
        inds = []
        for i in x.index:
            if cascade in x.iloc[i]["Pathways"]:
                inds.append(i)
        # n_samples_can_path is the number of samples (= patients) that are
        # profiled for their mutations, originate from primary tumor site,
        # refer to a particular cancer type and are altered via driver
        # mutation in a particular pathway.
        n_samples_can_path = len(set(x.iloc[inds]["Sample ID"]))

        # Format "perc" to two decimal places.
        perc = n_samples_can_path / n_samples_can * 100
        formatted_string = "{:.2f}".format(perc)
        perc = float(formatted_string)
        csl.append(perc)
    data_list.append(csl)
data = np.array(data_list)

```

```

# Plot the data
def heatmap(data, row_labels, col_labels, ax=None,
            cbar_kw={}, cbarlabel="", **kwargs):
    """
    Create a heatmap from a numpy array and two lists of labels.

    Parameters
    -----
    data
        A 2D numpy array of shape (N, M).
    row_labels
        A list or array of length N with the labels for the rows.
    col_labels
        A list or array of length M with the labels for the columns.
    ax
        A `matplotlib.axes.Axes` instance to which the heatmap is plotted. If
        not provided, use current axes or create a new one. Optional.
    cbar_kw
        A dictionary with arguments to `matplotlib.figure.colorbar`. Optional.
    cbarlabel
        The label for the colorbar. Optional.
    **kwargs
        All other arguments are forwarded to `imshow`.
    """

    if not ax:
        ax = plt.gca()

    # Plot the heatmap
    im = ax.imshow(data, **kwargs)

    # Create colorbar
    cbar = ax.figure.colorbar(im, ax=ax, **cbar_kw)
    cbar.ax.set_ylabel(cbarlabel, rotation=-90, va="bottom")

    # We want to show all ticks...
    ax.set_xticks(np.arange(data.shape[1]))
    ax.set_yticks(np.arange(data.shape[0]))
    # ... and label them with the respective list entries.
    ax.set_xticklabels(col_labels)
    ax.set_yticklabels(row_labels)

    # Let the horizontal axes labeling appear on top.
    ax.tick_params(top=True, bottom=False,
                  labeltop=True, labelbottom=False)

    # Rotate the tick labels and set their alignment.
    plt.setp(ax.get_xticklabels(), rotation=-55, ha="right",
              rotation_mode="anchor")

```

```
# Turn spines off and create white grid.
ax.spines[:].set_visible(False)

ax.set_xticks(np.arange(data.shape[1]+1)-.5, minor=True)
ax.set_yticks(np.arange(data.shape[0]+1)-.5, minor=True)
ax.grid(which="minor", color="w", linestyle='-', linewidth=3)
ax.tick_params(which="minor", bottom=False, left=False)

return im, cbar
```

```
def annotate_heatmap(im, data=None, valfmt="{x:.2f}",
                    textcolors=("black", "white"),
                    threshold=None, **textkw):
```

```
"""
```

A function to annotate a heatmap.

Parameters

```
-----
```

`im`

The AxesImage to be labeled.

`data`

Data used to annotate. If None, the image's data is used. Optional.

`valfmt`

The format of the annotations inside the heatmap. This should either use the string format method, e.g. `"$ {x:.2f}"`, or be a ``matplotlib.ticker.Formatter``. Optional.

`textcolors`

A pair of colors. The first is used for values below a threshold, the second for those above. Optional.

`threshold`

Value in data units according to which the colors from `textcolors` are applied. If None (the default) uses the middle of the colormap as separation. Optional.

`**kwargs`

All other arguments are forwarded to each call to ``text`` used to create the text labels.

```
"""
```

```
if not isinstance(data, (list, np.ndarray)):
    data = im.get_array()
```

```
# Normalize the threshold to the images color range.
```

```
if threshold is not None:
```

```
    threshold = im.norm(threshold)
```

```
else:
```

```
    threshold = im.norm(data.max())/2.
```

```
# Set default alignment to center, but allow it to be
```

```
# overwritten by textkw.
```

```
kw = dict(horizontalalignment="center",
          verticalalignment="center")
```

```

kw.update(textkw)

# Get the formatter in case a string is supplied
if isinstance(valfmt, str):
    valfmt = matplotlib.ticker.StrMethodFormatter(valfmt)

# Loop over the data and create a `Text` for each "pixel".
# Change the text's color depending on the data.
texts = []
for i in range(data.shape[0]):
    for j in range(data.shape[1]):
        kw.update(color=textcolors[int(im.norm(data[i, j]) > threshold)])
        text = im.axes.text(j, i, valfmt(data[i, j], None), **kw)
        texts.append(text)

return texts

```

```

fig, ax = plt.subplots()
# fig.set_size_inches(10, 8)

```

```

im, cbar = heatmap(data, cancer_labels, pathway_labels, ax=ax, cmap="YlGn", cbarlabel="Driver
mutational rate (%)")
texts = annotate_heatmap(im, valfmt="{x:.2f}")

```

```

fig.tight_layout()
plt.show()

```

```

# The most interesting differences were shown for "p53" and "Cell cycle" paths,
# with a higher proportion of driver mutations found in metastatic vs primary
# Cutaneous Melanoma samples (27,82 vs 16,88 and 21,49 vs 11,69 respectively).

```

Find all genes found mutated (via driver mutation) only in metastatic but not in the primary cutaneous melanoma patients and sort them by their occurrence percentage.

```

cd ~\python programming\3

```

```

import pandas as pd
import numpy as np
import matplotlib.pyplot as plt

```

```

mut_prim =
pd.read_csv("driver_mutations_for_204_cancer_genes_includes_pathways_new_dataset_primary_t
umors.csv", index_col=0)
mut_prim = mut_prim[mut_prim["Cancer Type"] == "Cutaneous Melanoma"]

```

```

mut_metast =
pd.read_csv("driver_mutations_for_204_cancer_genes_includes_pathways_new_dataset_metastatic
_tumors.csv", index_col=0)
mut_metast = mut_metast[mut_metast["Cancer Type"] == "Cutaneous Melanoma"]

```

```

only_metast = []

```

```

for gene in list(set(mut_metast["Gene"])):
    if gene not in set(mut_prim["Gene"]):
        # Calculate the proportion of cutaneous melanoma patients that harbor
        # driver mutation in this gene and format to two decimal places.
        perc = len(set(mut_metast[mut_metast["Gene"] == gene]["Sample ID"])) /
len(set(mut_metast["Sample ID"])) * 100
        formatted_string = "{:.2f}".format(perc)
        perc = float(formatted_string)

        paths = mut_metast[mut_metast["Gene"] == gene].iloc[0]["Pathways"]
        only_metast.append((gene, paths, perc))

only_metast = sorted(only_metast, key = lambda x: x[2], reverse=True)
# Check the different FLT3 mutations occurring in metastatic cutaneous
# melanoma patients
set(mut_metast[mut_metast["Gene"] == "FLT3"]["Protein Change"])

# FLT3 harbors driver mutations in 4,83% of metastatic cutaneous melanoma
# patients but in no one of the primary. 13 different mutations were found, all
# inside the protein kinase domain of FLT3 gene, according to UniProt (P36888).

# Make the opposite work as well.
only_prim = []
for gene in list(set(mut_prim["Gene"])):
    if gene not in set(mut_metast["Gene"]):
        # Calculate the proportion of cutaneous melanoma patients that harbor
        # driver mutation in this gene and format to two decimal places.
        perc = len(set(mut_prim[mut_prim["Gene"] == gene]["Sample ID"])) /
len(set(mut_prim["Sample ID"])) * 100
        formatted_string = "{:.2f}".format(perc)
        perc = float(formatted_string)

        paths = mut_prim[mut_prim["Gene"] == gene].iloc[0]["Pathways"]
        only_prim.append((gene, paths, perc))

only_prim = sorted(only_prim, key = lambda x: x[2], reverse=True)
# We found only two genes being altered via somatic driver mutation exclusively
# in primary and not in metastatic tumors. These are LRP5 and DTX1, which
# however were found only in one primary sample each.

# Check the cancer type of primary tumors (if exist) that harbor each of the
# FLT3 mutations found in metastatic cutaneous melanoma patients.
data =
pd.read_csv("driver_mutations_for_204_cancer_genes_includes_pathways_new_dataset_primary_t
umors.csv", index_col=0)
flt3 = data[data.Gene == "FLT3"]
w = []
for alt in set(mut_metast[mut_metast["Gene"] == "FLT3"]["Protein Change"]):
    w.append((alt, set(flt3[flt3["Protein Change"] == alt]["Cancer Type"])))

```

Isolate only driver mutations of Head and Neck Squamous Cell Carcinoma patients and only clinical data of HNSCC patients that harbor at least one driver mutation on our 204 selected genes of interest.

```
cd ~\python programming\3
```

```
import pandas as pd
```

```
mut_prim =  
pd.read_csv("driver_mutations_for_204_cancer_genes_includes_pathways_new_dataset_primary_tumors.csv", index_col=0)  
clin =  
pd.read_csv("clinical_data_of_samples_profiled_for_their_mutations_and_from_primary_origin.csv", index_col=0)
```

```
data = mut_prim[mut_prim["Cancer Type"] == 'Head and Neck Squamous Cell Carcinoma']  
data.sort_values(by="Sample ID")
```

```
data.to_csv("driver_mutations_Head_and_Neck_Squamous_Cell_Carcinoma_includes_pathways_primary_tumors.csv")
```

```
# In clin, there are entries for 515 patients with a Head and Neck Squamous  
# Cell Carcinoma diagnosis. However in mut_prim, there are entries for 473  
# patients. This happens because in TCGA PanCaner Atlas projects' dataset,  
# there are 515 - 473 = 42 patients with the above diagnosis, that do not  
# harbor any driver mutations on our 204 selected genes of interest.
```

```
indices = []  
for i in clin.index:  
    if clin.iloc[i]["Sample ID"] not in set(data["Sample ID"]):  
        indices.append(i)  
clin = clin.drop(indices)  
clin.to_csv("clinical_data_Head_and_Neck_Squamous_Cell_Carcinoma_primary_tumors.csv")
```

Program that isolates for each signaling pathway the samples harboring driver mutations on this pathway and then it calculates the percentage of them that harbor driver mutation in each gene of this pathway. Finally, it sorts the data by the calculated percentages.

```
cd ~\python programming\3
```

```
import pandas as pd
```

```
data =  
pd.read_csv("driver_mutations_for_204_cancer_genes_includes_pathways_new_dataset_primary_tumors.csv", index_col=0)  
cascades = ["RTK_RAS", "cell_cycle", "p53", "PI3K_Akt", "b_catenin_Wnt", "Notch", "Hippo",
```



```
"Myc", "TGFb", "Nrf2", "BER", "NER", "MMR", "FA", "HDR", "NHEJ", "Others_DDR",
"Spliceosome", "Ubq", "Dubq", "Amino_acid", "Carbohydrates", "Energy", "Lipid", "Nucleotide",
"TCA_cycle", "Immunomodulators"]
```

```
# Function to sort the list by second item of tuple
```

```
def Sort_Tuple(tup):
```

```
    # reverse = True (Sorts in Descending order)
```

```
    # key is set to sort using second element of
```

```
    # sublist lambda has been used
```

```
    return(sorted(tup, key = lambda x: x[1], reverse=True))
```

```
final = []
```

```
for casc in cascades:
```

```
    info = []
```

```
    inds = []
```

```
    for i in data.index:
```

```
        if casc in data.iloc[i]["Pathways"]:
```

```
            inds.append(i)
```

```
    casc_data = data.iloc[inds]
```

```
    for gene in list(set(casc_data.Gene)):
```

```
        # "p" is the percentage of samples affected in a particular pathway,
```

```
        # that harbor driver mutation in a particular gene of this pathway.
```

```
        p = len(set(casc_data[casc_data.Gene == gene]["Sample ID"])) / len(set(casc_data["Sample ID"])) * 100
```

```
        formatted_string = "{:.2f}".format(p)
```

```
        p = float(formatted_string)
```

```
        info.append((gene, p))
```

```
    info = Sort_Tuple(info)
```

```
    final.append((casc, info))
```

Sort *TP53* gene alterations by their occurrence in order to find the most frequent ones. Given that almost all mutations of this gene occur in three-digit positions, the following program deals only with those positions.

```
cd ~\python programming\3
```

```
import pandas as pd
```

```
from collections import Counter
```

```
data =
```

```
pd.read_csv("driver_mutations_for_204_cancer_genes_includes_pathways_new_dataset_primary_tumors.csv", index_col=0)
```

```
part = data[data.Gene == "TP53"].reset_index().drop(columns="index")
```

```
# Sort TP53 mutations by their frequency
```

```
mf = Counter(list(part["Protein Change"])).most_common()
```

```
xs, ys = zip(*mf)
```

```

# Find TP53 substitutions affecting R175, R273 and R248 positions.
nons = []
for pos in ["R175", "R248", "R273"]:
    case = []
    for mut in xs:
        if mut.startswith(pos) and len(mut) == 5 and "*" not in mut:
            case.append(mut)
    nons.append(case)

# Calculate the proportion of samples with mutated TP53, that harbor a
# substitution in one of the most frequently substituted positions you found above.
rank = []
for k in range(len(nons)):
    inds = []
    for i in part.index:
        if part.iloc[i]["Protein Change"] in nons[k]:
            inds.append(i)
    p = len(set(part.iloc[inds]["Sample ID"])) / len(set(part["Sample ID"])) * 100
    p = float("{:.2f}".format(p))
    rank.append((nons[k][0][-1], p))
rank = sorted(rank, key=lambda x: x[1], reverse=True)

```

Something similar for *CDKN2A* gene.

```
cd ~\python programming\3
```

```
import pandas as pd
from collections import Counter
```

```

data =
pd.read_csv("driver_mutations_for_204_cancer_genes_includes_pathways_new_dataset_primary_tumors.csv", index_col=0)
part = data[data.Gene == "CDKN2A"].reset_index().drop(columns="index")

```

```

# Sort CDKN2A mutations by their frequency
mf = Counter(list(part["Protein Change"])).most_common()

```

```

# Find the most frequent (at least 5 registries) nonsense mutations of CDKN2A gene.
nons = []
for mut in mf:
    if mut[1] < 5:
        continue
    else:
        # I think that mutations with an "*" in their name refer to nonsense
        # mutations. Let's become sure of that.
        if "*" in mut[0]:
            if "Nonsense_Mutation" in set(part[part["Protein Change"] == mut[0]]["Mutation Type"]):
                nons.append(mut[0])

```

```
# Calculate the proportion of samples with mutated CDKN2A, that harbor one of the
# most frequent nonsense mutations you found above.
```

```
inds = []
for i in part.index:
    if part.iloc[i]["Protein Change"] in nons:
        inds.append(i)
p = len(set(part.iloc[inds]["Sample ID"])) / len(set(part["Sample ID"])) * 100
p = float("{:.2f}".format(p))
```

Something similar for *ATM* gene.

```
cd ~\python programming\3
```

```
import pandas as pd
from collections import Counter
```

```
data =
pd.read_csv("driver_mutations_for_204_cancer_genes_includes_pathways_new_dataset_primary_tumors.csv", index_col=0)
part = data[data.Gene == "ATM"].reset_index().drop(columns="index")
```

```
# Sort ATM mutations by their frequency
mf = Counter(list(part["Protein Change"])).most_common()
```

```
# Find ATM mutations affecting R337 position.
```

```
nons = []
for mut in mf:
    if "R337" in mut[0]:
        nons.append(mut[0])
```

```
# Calculate the proportion of samples with mutated ATM, that harbor one of the
# most frequent nonsense mutations you found above.
```

```
inds = []
for i in part.index:
    if part.iloc[i]["Protein Change"] in nons:
        inds.append(i)
p = len(set(part.iloc[inds]["Sample ID"])) / len(set(part["Sample ID"])) * 100
p = float("{:.2f}".format(p))
```

```
# Find the most frequent Mutation Type in ATM gene. (We have checked that each
# mutation belongs only to one Mutation Type). Due to the presence of more than
# one mutations in ATM gene in some patients, the sum of the percentages calculated
# here exceeds 100 %.
```

```
rank = []
for mt in list(set(part["Mutation Type"])):
    z = len(set(part[part["Mutation Type"] == mt]["Sample ID"])) / len(set(part["Sample ID"])) * 100
    z = float("{:.2f}".format(z))
    rank.append((mt, z))
rank = sorted(rank, key=lambda x: x[1], reverse=True)
```

RTK-RAS pathway driver mutations: calculate the proportion of patients harboring driver mutations only in receptor tyrosine kinase – encoding genes of the pathway (all combined, not separately).

```
cd ~\python programming\3
```

```
import pandas as pd
```

```
data =  
pd.read_csv("driver_mutations_for_204_cancer_genes_includes_pathways_new_dataset_primary_tumors.csv", index_col=0)
```

```
rtks = ["EGFR", "ERBB2", "FGFR3", "FLT3", "FGFR2", "ERBB3", "RET", "KIT", "MET",  
"ERBB4", "PDGFRA", "ALK", "FGFR1", "NTRK3", "NTRK1", "ROS1", "NTRK2", "IGF1R",  
"FGFR4"]
```

```
# Isolate only data referring to RTK-RAS pathway alterations (some genes  
# may also participate in another pathway).
```

```
inds = []  
for i in data.index:  
    if "RTK_RAS" in data.iloc[i]["Pathways"]:  
        inds.append(i)  
drtk = data.iloc[inds].reset_index().drop(columns="index")
```

```
# Find all different sample IDs of RTK-RAS affected patients, that carry a  
# driver mutation in one of the receptor tyrosine kinases of this pathway.
```

```
ids = []  
for k in drtk.index:  
    if drtk.iloc[k].Gene in rtks:  
        if drtk.iloc[k]["Sample ID"] not in ids:  
            ids.append(drtk.iloc[k]["Sample ID"])
```

```
p = len(ids) / len(set(drtk["Sample ID"])) * 100  
p = float("{:.2f}".format(p))
```

KRAS

```
cd ~\python programming\3
```

```
import pandas as pd  
from collections import Counter
```

```
data =  
pd.read_csv("driver_mutations_for_204_cancer_genes_includes_pathways_new_dataset_primary_tumors.csv", index_col=0)  
part = data[data.Gene == "KRAS"].reset_index().drop(columns="index")
```

```
# Sort KRAS mutations by their frequency
```

```

mf = Counter(list(part["Protein Change"])).most_common()

# Sort the 4 most frequently altered KRAS positions by their mutational frequency.
# We 've checked that no other positions start with the same code as the four
# positions of interest (e.g. for G12 there is no G126).
nons = []
for pos in ["G12", "G13", "Q61", "A146"]:
    # "c" counts the affected registries for each position
    c = 0
    for mut in mf:
        if pos in mut[0]:
            c += mut[1]
    nons.append((pos, c))
nons = sorted(nons, key= lambda x: x[1], reverse=True)

# Calculate the proportion of samples with mutated KRAS, that carry an alteration
# in each of the four most frequently mutated positions of the gene.
rank = []
x, y = zip(*nons)
for thesi in x:
    inds = []
    for i in part.index:
        if part.iloc[i]["Protein Change"].startswith(thesi):
            inds.append(i)
    p = len(set(part.iloc[inds]["Sample ID"])) / len(set(part["Sample ID"])) * 100
    p = float("{:.2f}".format(p))
    rank.append((thesi, p))

# Calculate the total proportion of samples with mutated KRAS, that carry an
# alteration in one of the four most frequently mutated positions of the gene. This
# proportion may slightly differ from the sum of the proportions calculated above,
# because some patients may carry more than one of these mutations in KRAS gene.
inds = []
for thesi in x:
    for i in part.index:
        if thesi in part.iloc[i]["Protein Change"]:
            inds.append(i)
p = len(set(part.iloc[inds]["Sample ID"])) / len(set(part["Sample ID"])) * 100
p = float("{:.2f}".format(p))

```

BRAF

```
cd ~\python programming\3
```

```
import pandas as pd
from collections import Counter
```

```

data =
pd.read_csv("driver_mutations_for_204_cancer_genes_includes_pathways_new_dataset_primary_t
umors.csv", index_col=0)
part = data[data.Gene == "BRAF"].reset_index().drop(columns="index")

```

```

# Sort BRAF mutations by their frequency
mf = Counter(list(part["Protein Change"])).most_common()

# Calculate the proportion of samples bearing BRAF mutations at position V600.
inds = []
for i in part.index:
    if part.iloc[i]["Protein Change"].startswith("V600"):
        inds.append(i)
p = len(set(part.iloc[inds]["Sample ID"])) / len(set(part["Sample ID"])) * 100
p = float("{:.2f}".format(p))

# Isolate BRAF rearrangement partner genes. Only in rearrangement names there
# is the "-" symbol, which separates the participating genes.
x, y = zip(*mf)
partners = []
for mut in x:
    if "-" in mut:
        for par in mut.split("-"):
            if par != "BRAF" and par not in partners:
                partners.append(par)

# Calculate the proportion of samples bearing BRAF rearrangements.
indices = []
for i in part.index:
    if "-" in part.iloc[i]["Protein Change"]:
        indices.append(i)
perc = len(set(part.iloc[indices]["Sample ID"])) / len(set(part["Sample ID"])) * 100
perc = float("{:.2f}".format(perc))

```

NF1

```
cd ~\python programming\3
```

```
import pandas as pd
from collections import Counter
```

```
data =
pd.read_csv("driver_mutations_for_204_cancer_genes_includes_pathways_new_dataset_primary_tumors.csv", index_col=0)
part = data[data.Gene == "NF1"].reset_index().drop(columns="index")
```

```
# Sort NF1 mutations by their frequency
mf = Counter(list(part["Protein Change"])).most_common()
```

```
# Find the most frequent Mutation Type in NF1 gene. (We have checked that each
# mutation belongs only to one Mutation Type). Calculate the occurrence of each
# type utilizing mutation registries, not sample IDs, because some patients
```

```

# carry more than 1 mutations in NF1 gene, so using sample IDs the results
# will be overlapped.
rank = []
for mt in list(set(part["Mutation Type"])):
    z = len(part[part["Mutation Type"] == mt]) / len(part) * 100
    z = float("{:.2f}".format(z))
    rank.append((mt, z))
rank = sorted(rank, key=lambda x: x[1], reverse=True)

# Calculate the occurrence of "R2450*" mutation against all somatic NF1 mutations.
# (our data include only somatic and no germline mutations)
inds = []
for i in part.index:
    if part.iloc[i]["Protein Change"] == "R2450*":
        inds.append(i)
p = len(part.iloc[inds]) / len(part) * 100
p = float("{:.2f}".format(p))

```

Lipids metabolism: sort genes of the pathway by the proportion of patients affected (among all patients with driver mutation/s in this pathway). Then, depending on the gene case, make the appropriate calculations needed for the paper.

```
cd ~\python programming\3
```

```
import pandas as pd
from collections import Counter
```

```
data =
pd.read_csv("driver_mutations_for_204_cancer_genes_includes_pathways_new_dataset_primary_tumors.csv", index_col=0)
```

```
# Isolate only data referring to Lipids pathway alterations (some genes
# may also participate in another pathway).
```

```
inds = []
for i in data.index:
    if "Lipid" in data.iloc[i]["Pathways"]:
        inds.append(i)
part = data.iloc[inds].reset_index().drop(columns="index")
```

```
# Sort Lipids metabolism's genes by the number of identified driver mutations.
```

```
mf = Counter(list(part.Gene)).most_common()
x, y = zip(*mf)
```

```
# Find all different sample IDs of Lipid metabolism affected patients, that carry a
# driver mutation in each of the mutated genes of this pathway. Then, calculate
# the corresponding proportion.
```

```
rank = []
for gene in x:
    ids = [sid for sid in set(part[part.Gene == gene]["Sample ID"])]
    p = len(ids) / len(set(part["Sample ID"])) * 100
```

```

p = float("{:.2f}".format(p))
rank.append((gene, p))

# Isolate the 3 top mutated genes of the Lipids metabolism pathway.
z, h = zip(*rank[:3])
# For each of these genes, sort their mutations by the number of their registries.
rm = []
for gene in z:
    part = data[data.Gene == gene].reset_index().drop(columns="index")
    mf = Counter(list(part["Protein Change"])).most_common()
    rm.append((gene, mf))

# PIK3CA'S RESULTS MANAGEMENT

r1 = Counter(data[data.Gene == "PIK3CA"]["Mutation Type"]).most_common()
pik3ca = data[data.Gene == "PIK3CA"]
# Proportion of missense mutations among all PIK3CA mutations
r1[0][1] / len(pik3ca) * 100
# Sum the registries of the 3 most frequent mutations of PIK3CA gene
x, y = zip(*rm[0][1][:3])
sum(y) / len(pik3ca[pik3ca["Mutation Type"] == "Missense_Mutation"]) * 100

# PTEN's RESULTS MANAGEMENT

r2 = Counter(data[data.Gene == "PTEN"]["Mutation Type"]).most_common()
pten = data[data.Gene == "PTEN"].reset_index().drop(columns="index")
x, y = zip(*r2)
# Calculate the total proportion of PTEN carriers with missense, frameshift
# indels and nonsense mutations.
inds = []
for i in pten.index:
    if pten.iloc[i]["Mutation Type"] in x[:4]:
        inds.append(i)
p = len(set(pten.iloc[inds]["Sample ID"])) / len(set(pten["Sample ID"])) * 100
p = float("{:.2f}".format(p))

# Sort the first 3 hotspots by their mutational occurrence.
rank = []
for mut in ["R130", "R233", "T319"]:
    indices = []
    for i in pten.index:
        if pten.iloc[i]["Protein Change"].startswith(mut):
            indices.append(i)
    p = len(set(pten.iloc[indices]["Sample ID"])) / len(set(pten["Sample ID"])) * 100
    p = float("{:.2f}".format(p))
    rank.append((mut, p))
rank = sorted(rank, key = lambda x : x[1], reverse=True)

# IDH1's RESULTS MANAGEMENT

# Find all IDH1 mutation registries. From rm[2][1] arises that almost all mutants

```



```
# affect R132 position.
x, y = zip(*rm[2][1])
sum(y)
# Calculate the number of patients where these mutations are present (in data
# there is one sample per patient so each Sample ID represents a different patient)
len(set(data[data.Gene == "IDH1"]["Sample ID"]))
```

PI3K/Akt: sort genes of the pathway by the proportion of patients affected (among all patients with driver mutation/s in this pathway). Then, depending on the gene case, make the appropriate calculations needed for the paper.

```
cd ~\python programming\3
```

```
import pandas as pd
from collections import Counter
```

```
data =
pd.read_csv("driver_mutations_for_204_cancer_genes_includes_pathways_new_dataset_primary_tumors.csv", index_col=0)
```

```
# Isolate mutation registries referring to PI3K/Akt pathway genes (some genes
# also participate in other pathways).
```

```
inds = []
for i in data.index:
    if "PI3K_Akt" in data.iloc[i].Pathways:
        inds.append(i)
part = data.iloc[inds].reset_index().drop(columns="index")
```

```
# Get an idea of the most frequently mutated genes of the pathway (by counting
# the mutation registries for each of them). However, this is not the best way
# to conclude to the sorted gene list, given that some patients may harbor more
# than one mutation in the same gene (even though this is somewhat rare).
# Sort Lipids metabolism's genes by the number of identified driver mutations.
mf = Counter(part.Gene).most_common()
x, y = zip(*mf)
```

```
# Find all different sample IDs of PI3K/Akt affected patients, that carry a
# driver mutation in each of the mutated genes of this pathway. Then, calculate
# the corresponding proportion.
```

```
rank = []
for gene in x:
    ids = [sid for sid in set(part[part.Gene == gene]["Sample ID"])]
    p = len(ids) / len(set(part["Sample ID"])) * 100
    p = float("{:.2f}".format(p))
    rank.append((gene, p))
rank = sorted(rank, key=lambda x : x[1], reverse=True)
```

```
# Calculate the proportion of PI3K/Akt-deregulated patients harboring mutations
# in at least one of the three top mutated genes of the pathway (PIK3CA, PTEN
```

```

# and PIK3R1)
unique = []
for gene in x[:3]:
    ids = [sid for sid in set(part[part.Gene == gene]["Sample ID"])]
    for patient in ids:
        if patient not in unique:
            unique.append(patient)
t3 = len(unique) / len(set(part["Sample ID"])) * 100
t3 = float("{:.2f}".format(t3))

# Calculate the proportion of PI3K/Akt-deregulated patients harboring mutations
# in at least two of the three top mutated genes of the pathway (PIK3CA, PTEN
# and PIK3R1)
two = 0
three = 0
for patient in unique:
    score = 0
    mutg = list(part[part["Sample ID"] == patient].Gene)
    for top in x[:3]:
        if top in mutg:
            score += 1
    if score == 2:
        two += 1
    elif score == 3:
        three += 1
two_and_three = (two + three) / len(set(part["Sample ID"])) * 100
two_and_three = float("{:.2f}".format(two_and_three))

# PIK3R1's RESULTS MANAGEMENT
pik3r1 = part[part.Gene == "PIK3R1"].reset_index().drop(columns="index")
pch = Counter(pik3r1["Protein Change"]).most_common()
ch, fr = zip(*pch)

# Sort protein changes of PIK3R1 by their occurrence rate
rank = []
for mut in ch:
    indices = []
    for i in pik3r1.index:
        if pik3r1.iloc[i]["Protein Change"] == mut:
            indices.append(i)
    p = len(set(pik3r1.iloc[indices]["Sample ID"])) / len(set(pik3r1["Sample ID"])) * 100
    p = float("{:.2f}".format(p))
    rank.append((mut, p))
rank = sorted(rank, key = lambda x : x[1], reverse=True)

```

Ubiquitin pathway. Depending on the gene case, make the appropriate calculations needed for the paper.

cd ~\python programming\3

```

import pandas as pd
from collections import Counter

```

```

data =
pd.read_csv("driver_mutations_for_204_cancer_genes_includes_pathways_new_dataset_primary_t
umors.csv", index_col=0)

# Isolate mutation registries referring to ubiquitination or deubiquitination
# pathways' genes (some genes also participate in other pathways).
inds = []
for i in data.index:
    if "Dubq" in data.iloc[i].Pathways or "Ubq" in data.iloc[i].Pathways:
        inds.append(i)
part = data.iloc[inds].reset_index().drop(columns="index")

rank = []
for gene in set(part.Gene):
    ids = [sid for sid in set(part[part.Gene == gene]["Sample ID"])]
    p = len(ids) / len(set(part["Sample ID"])) * 100
    p = float("{:.2f}".format(p))
    rank.append((gene, p))
rank = sorted(rank, key=lambda x : x[1], reverse=True)

# FBXW7's RESULTS MANAGEMENT
fbxw7 = part[part.Gene == "FBXW7"].reset_index().drop(columns="index")
pch = Counter(fbxw7["Protein Change"]).most_common()
ch, fr = zip(*pch)

# Sort protein changes of FBXW7 by their occurrence rate
rank = []
for mut in ch:
    indices = []
    for i in fbxw7.index:
        if fbxw7.iloc[i]["Protein Change"] == mut:
            indices.append(i)
    p = len(set(fbxw7.iloc[indices]["Sample ID"])) / len(set(fbxw7["Sample ID"])) * 100
    p = float("{:.2f}".format(p))
    rank.append((mut, p))
rank = sorted(rank, key = lambda x : x[1], reverse=True)

# Calculate the proportion of samples bearing FBXW7 mutations at positions R465,
# R505, R479 and all together.
rankpos = []
unique = []
for pos in ["R465", "R505", "R479"]:
    sids = []
    for i in fbxw7.index:
        if fbxw7.iloc[i]["Protein Change"].startswith(pos):
            sids.append(fbxw7.iloc[i]["Sample ID"])
            if fbxw7.iloc[i]["Sample ID"] not in unique:
                unique.append(fbxw7.iloc[i]["Sample ID"])
    p = len(set(sids)) / len(set(fbxw7["Sample ID"])) * 100
    p = float("{:.2f}".format(p))

```

```

    rankpos.append((pos, p))
p = len(set(unique)) / len(set(fbxw7["Sample ID"])) * 100
p = float("{:.2f}".format(p))
rankpos.append(("ALL", p))

# EP300's RESULTS MANAGEMENT
ep300 = part[part.Gene == "EP300"].reset_index().drop(columns="index")
pch = Counter(ep300["Protein Change"]).most_common()
ch, fr = zip(*pch)

# Sort protein changes of EP300 by their occurrence rate
rank = []
for mut in ch:
    indices = []
    for i in ep300.index:
        if ep300.iloc[i]["Protein Change"] == mut:
            indices.append(i)
    p = len(set(ep300.iloc[indices]["Sample ID"])) / len(set(ep300["Sample ID"])) * 100
    p = float("{:.2f}".format(p))
    rank.append((mut, p))
rank = sorted(rank, key = lambda x : x[1], reverse=True)

# Get an idea of the frequency of each mutation type affecting EP300 gene.
Counter(ep300["Mutation Type"]).most_common()

# CREBBP's RESULTS MANAGEMENT
crebbp = part[part.Gene == "CREBBP"].reset_index().drop(columns="index")
pch = Counter(crebbp["Protein Change"]).most_common()
ch, fr = zip(*pch)

# Sort protein changes of CREBBP by their occurrence rate
rank = []
for mut in ch:
    indices = []
    for i in crebbp.index:
        if crebbp.iloc[i]["Protein Change"] == mut:
            indices.append(i)
    p = len(set(crebbp.iloc[indices]["Sample ID"])) / len(set(crebbp["Sample ID"])) * 100
    p = float("{:.2f}".format(p))
    rank.append((mut, p))
rank = sorted(rank, key = lambda x : x[1], reverse=True)

# Get an idea of the frequency of each mutation type affecting crebbp gene.
Counter(crebbp["Mutation Type"]).most_common()

```

WNT/b catenin pathway. Depending on the gene case, make the appropriate calculations needed for the paper.

cd ~\python programming\3

```

import pandas as pd
from collections import Counter
import re

data =
pd.read_csv("driver_mutations_for_204_cancer_genes_includes_pathways_new_dataset_primary_tumors.csv", index_col=0)

# Isolate mutation registries referring to WNT/b catenin pathways' genes (some
# genes also participate in other pathways).
inds = []
for i in data.index:
    if "b_catenin_Wnt" in data.iloc[i].Pathways:
        inds.append(i)
part = data.iloc[inds].reset_index().drop(columns="index")

rank = []
for gene in set(part.Gene):
    ids = [sid for sid in set(part[part.Gene == gene]["Sample ID"])]
    p = len(ids) / len(set(part["Sample ID"])) * 100
    p = float("{:.2f}".format(p))
    rank.append((gene, p))
rank = sorted(rank, key=lambda x : x[1], reverse=True)

# APC's RESULTS MANAGEMENT
apc = part[part.Gene == "APC"].reset_index().drop(columns="index")
pch = Counter(apc["Protein Change"]).most_common()
ch, fr = zip(*pch)

# Sort protein changes of APC by their occurrence rate
rank = []
for mut in ch:
    indices = []
    for i in apc.index:
        if apc.iloc[i]["Protein Change"] == mut:
            indices.append(i)
    p = len(set(apc.iloc[indices]["Sample ID"])) / len(set(apc["Sample ID"])) * 100
    p = float("{:.2f}".format(p))
    rank.append((mut, p))
rank = sorted(rank, key = lambda x : x[1], reverse=True)

# Get an idea of the frequency of each mutation type affecting APC gene.
Counter(apc["Mutation Type"]).most_common()

# Find the most frequent Mutation Type in APC gene. (We have checked that each
# mutation belongs only to one Mutation Type). Due to the presence of more than
# one mutations in APC gene in some patients, the sum of the percentages calculated
# here exceeds 100 %.
rankmt = []
for mt in list(set(part["Mutation Type"])):
    z = len(set(part[part["Mutation Type"] == mt]["Sample ID"])) / len(set(part["Sample ID"])) * 100
    z = float("{:.2f}".format(z))

```

```

    rankmt.append((mt, z))
rankmt = sorted(rankmt, key=lambda x: x[1], reverse=True)

# CTNNB1's RESULTS MANAGEMENT
ctnnb1 = part[part.Gene == "CTNNB1"].reset_index().drop(columns="index")
pch = Counter(ctnnb1["Protein Change"]).most_common()
ch, fr = zip(*pch)

# Sort protein changes of CTNNB1 by their occurrence rate
rank = []
for mut in ch:
    indices = []
    for i in ctnnb1.index:
        if ctnnb1.iloc[i]["Protein Change"] == mut:
            indices.append(i)
    p = len(set(ctnnb1.iloc[indices]["Sample ID"])) / len(set(ctnnb1["Sample ID"])) * 100
    p = float("{:.2f}".format(p))
    rank.append((mut, p))
rank = sorted(rank, key = lambda x : x[1], reverse=True)

# Find all substitution positions of CTNNB1 gene. We have checked that missense
# mutations of this gene happen in two- or three-digit positions, so the
# alterations consist of up to 5 characters. Contrariwise, protein changes that
# belong to other mutation types (here, only deletions) consist of at least 6
# characters (this is the case for the mutations we have identified in CTNNB1)
positions = []
for pc in ch:
    if len(pc) <= 5:
        if re.findall("[0-9]+", pc)[0] not in positions:
            positions.append(re.findall("[0-9]+", pc)[0])

# Calculate the proportion of samples bearing CTNNB1 mutations at each
# substitution position, as well as the total proportion of the 6 most prevalent
# (in our results, these are 33, 37, 32, 45, 41 and 34).
rankpos = []
unique = []
for pos in positions:
    sids = []
    # We have to avoid overlapped counting. For example, when counting Sample IDs
    # harboring substitutions at position 33, we don't want to include Sample IDs
    # that harbor substitution at position 335 (which includes term 33).
    if len(pos) == 2:
        for i in ctnnb1.index:
            if len(ctnnb1.iloc[i]["Protein Change"]) == 4 and pos in ctnnb1.iloc[i]["Protein Change"]:
                sids.append(ctnnb1.iloc[i]["Sample ID"])
    elif len(pos) == 3:
        for i in ctnnb1.index:
            if len(ctnnb1.iloc[i]["Protein Change"]) == 5 and pos in ctnnb1.iloc[i]["Protein Change"]:
                sids.append(ctnnb1.iloc[i]["Sample ID"])

    if pos in ["33", "37", "32", "45", "41", "34"]:
        for s in sids:

```

```

        if s not in unique:
            unique.append(s)
        p = len(set(sids)) / len(set(ctnnb1["Sample ID"])) * 100
        p = float("{:.2f}".format(p))
        rankpos.append((pos, p))
    p = len(set(unique)) / len(set(ctnnb1["Sample ID"])) * 100
    p = float("{:.2f}".format(p))
    rankpos.append(("Hottest 6 positions", p))
    rankpos = sorted(rankpos, key= lambda x : x[1], reverse=True)

# Get an idea of the frequency of each mutation type affecting CTNNB1 gene.
Counter(ctnnb1["Mutation Type"]).most_common()

```

# RNF43's RESULTS MANAGEMENT

```

rnf43 = part[part.Gene == "RNF43"].reset_index().drop(columns="index")
pch = Counter(rnf43["Protein Change"]).most_common()
ch, fr = zip(*pch)

```

# Sort protein changes of RNF43 by their occurrence rate

```

rank = []
for mut in ch:
    indices = []
    for i in rnf43.index:
        if rnf43.iloc[i]["Protein Change"] == mut:
            indices.append(i)
    p = len(set(rnf43.iloc[indices]["Sample ID"])) / len(set(rnf43["Sample ID"])) * 100
    p = float("{:.2f}".format(p))
    rank.append((mut, p))
rank = sorted(rank, key = lambda x : x[1], reverse=True)

```

# Find the most frequent Mutation Type in RNF43 gene. (We have checked that each  
# mutation belongs only to one Mutation Type). Due to the presence of more than  
# one mutations in RNF43 gene in some patients, the sum of the percentages calculated  
# here may exceed 100 %.

```

rankmt = []
for mt in list(set(rnf43["Mutation Type"])):
    z = len(set(rnf43[rnf43["Mutation Type"] == mt]["Sample ID"])) / len(set(rnf43["Sample ID"])) *
100
    z = float("{:.2f}".format(z))
    rankmt.append((mt, z))
rankmt = sorted(rankmt, key=lambda x: x[1], reverse=True)

```

Cell cycle pathway. Depending on the gene case, make the appropriate calculations needed for the paper.

```

import os
os.chdir("~\\python programming\\3")

```

```

import pandas as pd
from collections import Counter

```

```

import re

data =
pd.read_csv("driver_mutations_for_204_cancer_genes_includes_pathways_new_dataset_primary_t
umors.csv", index_col=0)

# Isolate mutation registries referring to cell cycle pathways' genes (some
# genes also participate in other pathways).
inds = []
for i in data.index:
    if "cell_cycle" in data.iloc[i].Pathways:
        inds.append(i)
part = data.iloc[inds].reset_index().drop(columns="index")

# RB1's RESULTS MANAGEMENT
rb1 = part[part.Gene == "RB1"].reset_index().drop(columns="index")
pch = Counter(rb1["Protein Change"]).most_common()
ch, fr = zip(*pch)

# Sort protein changes of RB1 by their occurrence rate
rank = []
for mut in ch:
    indices = []
    for i in rb1.index:
        if rb1.iloc[i]["Protein Change"] == mut:
            indices.append(i)
    p = len(set(rb1.iloc[indices]["Sample ID"])) / len(set(rb1["Sample ID"])) * 100
    p = float("{:.2f}".format(p))
    rank.append((mut, p))
rank = sorted(rank, key = lambda x : x[1], reverse=True)

# Find the most frequent Mutation Type in RB1 gene. (We have checked that each
# mutation belongs only to one Mutation Type). Due to the presence of more than
# one mutations in RB1 gene in some patients, the sum of the percentages calculated
# here may exceed 100 %.
rankmt = []
for mt in list(set(rb1["Mutation Type"])):
    z = len(set(rb1[rb1["Mutation Type"] == mt]["Sample ID"])) / len(set(rb1["Sample ID"])) * 100
    z = float("{:.2f}".format(z))
    rankmt.append((mt, z))
rankmt = sorted(rankmt, key=lambda x: x[1], reverse=True)

# Find all non-rearrangement (non-fusion) positions of RB1 gene. Fusion names
# are the only ones including a "-" in them. We exclude them because we want to
# rank specific mutational positions for their alteration rate (fusion names
# just include the implicated gene names).
positions = []
for pc in ch:
    if "-" not in pc:
        if re.findall("[0-9]+",pc)[0] not in positions:
            positions.append(re.findall("[0-9]+",pc)[0])

```



```

# Calculate the proportion of samples bearing RB1 mutations at each of the above
# positions.
rankpos = []
unique = []
for pos in positions:
    sids = []
    # We have to avoid overlapped counting. For example, when counting Sample IDs
    # harboring substitutions at position 33, we don't want to include Sample IDs
    # that harbor substitution at position 335 (which includes term 33).
    for i in rb1.index:
        if "-" in rb1.iloc[i]["Protein Change"]:
            continue
        else:
            if int(pos) == int(re.findall("[0-9]+", rb1.iloc[i]["Protein Change"])[0]):
                sids.append(rb1.iloc[i]["Sample ID"])
    p = len(set(sids)) / len(set(rb1["Sample ID"])) * 100
    p = float("{:.2f}".format(p))
    rankpos.append((pos, p))
rankpos = sorted(rankpos, key= lambda x : x[1], reverse=True)

# CDKN1A's RESULTS MANAGEMENT
cdkn1a = part[part.Gene == "CDKN1A"].reset_index().drop(columns="index")
pch = Counter(cdkn1a["Protein Change"]).most_common()
ch, fr = zip(*pch)

# Sort protein changes of CDKN1A by their occurrence rate
rank = []
for mut in ch:
    indices = []
    for i in cdkn1a.index:
        if cdkn1a.iloc[i]["Protein Change"] == mut:
            indices.append(i)
    p = len(set(cdkn1a.iloc[indices]["Sample ID"])) / len(set(cdkn1a["Sample ID"])) * 100
    p = float("{:.2f}".format(p))
    rank.append((mut, p))
rank = sorted(rank, key = lambda x : x[1], reverse=True)

# Find the most frequent Mutation Type in CDKN1A gene. (We have checked that each
# mutation belongs only to one Mutation Type). Due to the presence of more than
# one mutations in CDKN1A gene in some patients, the sum of the percentages calculated
# here may exceed 100 %.
rankmt = []
for mt in list(set(cdkn1a["Mutation Type"])):
    z = len(set(cdkn1a[cdkn1a["Mutation Type"] == mt]["Sample ID"])) / len(set(cdkn1a["Sample ID"])) * 100
    z = float("{:.2f}".format(z))
    rankmt.append((mt, z))
rankmt = sorted(rankmt, key=lambda x: x[1], reverse=True)

# Check the cancer types where CDKN1A mutations occur and their rate
Counter(cdkn1a["Cancer Type"]).most_common()

```

HDR pathway. Depending on the gene case, make the appropriate calculations needed for the paper.

```
import os
os.chdir("~\\python programming\\3")

import pandas as pd
from collections import Counter
import re

data =
pd.read_csv("driver_mutations_for_204_cancer_genes_includes_pathways_new_dataset_primary_tumors.csv", index_col=0)

# Isolate mutation registries referring to HDR pathways' genes (some
# genes also participate in other pathways).
inds = []
for i in data.index:
    if "HDR" in data.iloc[i].Pathways:
        inds.append(i)
part = data.iloc[inds].reset_index().drop(columns="index")

# BRCA2's RESULTS MANAGEMENT
brca2 = part[part.Gene == "BRCA2"].reset_index().drop(columns="index")
pch = Counter(brca2["Protein Change"]).most_common()
ch, fr = zip(*pch)

# Sort protein changes of BRCA2 by their occurrence rate
rank = []
for mut in ch:
    indices = []
    for i in brca2.index:
        if brca2.iloc[i]["Protein Change"] == mut:
            indices.append(i)
    p = len(set(brca2.iloc[indices]["Sample ID"])) / len(set(brca2["Sample ID"])) * 100
    p = float("{:.2f}".format(p))
    rank.append((mut, p))
rank = sorted(rank, key = lambda x : x[1], reverse=True)

# Find the most frequent Mutation Type in BRCA2 gene. (We have checked that each
# mutation belongs only to one Mutation Type). Due to the presence of more than
# one mutations in BRCA2 gene in some patients, the sum of the percentages calculated
# here may exceed 100 %.
rankmt = []
for mt in list(set(brca2["Mutation Type"])):
    z = len(set(brca2[brca2["Mutation Type"] == mt]["Sample ID"])) / len(set(brca2["Sample ID"]))
    * 100
    z = float("{:.2f}".format(z))
    rankmt.append((mt, z))
rankmt = sorted(rankmt, key=lambda x: x[1], reverse=True)
```

```

# Check the cancer types where BRCA2 mutations occur and their rate
Counter(brca2["Cancer Type"]).most_common()

# Find all non-rearrangement (non-fusion) positions of BRCA2 gene. Fusion names
# are the only ones including a "-" in them. We exclude them because we want to
# rank specific mutational positions for their alteration rate (fusion names
# just include the implicated gene names).
positions = []
for pc in ch:
    if "-" not in pc:
        if re.findall("[0-9]+",pc)[0] not in positions:
            positions.append(re.findall("[0-9]+",pc)[0])

# Calculate the proportion of samples bearing BRCA2 mutations at each of the above
# positions.
rankpos = []
unique = []
for pos in positions:
    sids = []
    # We have to avoid overlapped counting. For example, when counting Sample IDs
    # harboring substitutions at position 33, we don't want to include Sample IDs
    # that harbor substitution at position 335 (which includes term 33).
    for i in brca2.index:
        if "-" in brca2.iloc[i]["Protein Change"]:
            continue
        else:
            if int(pos) == int(re.findall("[0-9]+", brca2.iloc[i]["Protein Change"])[0]):
                sids.append(brca2.iloc[i]["Sample ID"])
    p = len(set(sids)) / len(set(brca2["Sample ID"])) * 100
    p = float("{:.2f}".format(p))
    rankpos.append((pos, p))
rankpos = sorted(rankpos, key= lambda x : x[1], reverse=True)

# Find all nonsense mutation positions of BRCA2 gene.
positions = []
for pc in set(brca2[brca2["Mutation Type"] == "Nonsense_Mutation"]["Protein Change"]):
    if re.findall("[0-9]+",pc)[0] not in positions:
        positions.append(re.findall("[0-9]+",pc)[0])

# Find how many of them lose the C-terminal ~1000 amino acid residues. BRCA2
# protein has 3418 amino acids (UniProtKB - P51587) and its DNA-binding domain
# starts from position 2479 (PMID: 25447315). Compare the result with
# len(positions).
c = 0
for p in positions:
    if int(p)<2479:
        c+=1

# BRCA1's RESULTS MANAGEMENT
brca1 = part[part.Gene == "BRCA1"].reset_index().drop(columns="index")
pch = Counter(brca1["Protein Change"]).most_common()

```

```

ch, fr = zip(*pch)

# Sort protein changes of BRCA1 by their occurrence rate
rank = []
for mut in ch:
    indices = []
    for i in brca1.index:
        if brca1.iloc[i]["Protein Change"] == mut:
            indices.append(i)
    p = len(set(brca1.iloc[indices]["Sample ID"])) / len(set(brca1["Sample ID"])) * 100
    p = float("{:.2f}".format(p))
    rank.append((mut, p))
rank = sorted(rank, key = lambda x : x[1], reverse=True)

# Find the most frequent Mutation Type in BRCA1 gene. (We have checked that each
# mutation belongs only to one Mutation Type). Due to the presence of more than
# one mutations in BRCA1 gene in some patients, the sum of the percentages calculated
# here may exceed 100 %.
rankmt = []
for mt in list(set(brca1["Mutation Type"])):
    z = len(set(brca1[brca1["Mutation Type"] == mt]["Sample ID"])) / len(set(brca1["Sample ID"]))
    * 100
    z = float("{:.2f}".format(z))
    rankmt.append((mt, z))
rankmt = sorted(rankmt, key=lambda x: x[1], reverse=True)

# TP53BP1's RESULTS MANAGEMENT
tp53bp1 = part[part.Gene == "TP53BP1"].reset_index().drop(columns="index")
pch = Counter(tp53bp1["Protein Change"]).most_common()
ch, fr = zip(*pch)

# Sort protein changes of TP53BP1 by their occurrence rate
rank = []
for mut in ch:
    indices = []
    for i in tp53bp1.index:
        if tp53bp1.iloc[i]["Protein Change"] == mut:
            indices.append(i)
    p = len(set(tp53bp1.iloc[indices]["Sample ID"])) / len(set(tp53bp1["Sample ID"])) * 100
    p = float("{:.2f}".format(p))
    rank.append((mut, p))
rank = sorted(rank, key = lambda x : x[1], reverse=True)

# Find the most frequent Mutation Type in TP53BP1 gene. (We have checked that each
# mutation belongs only to one Mutation Type). Due to the presence of more than
# one mutations in TP53BP1 gene in some patients, the sum of the percentages calculated
# here may exceed 100 %.
rankmt = []
for mt in list(set(tp53bp1["Mutation Type"])):
    z = len(set(tp53bp1[tp53bp1["Mutation Type"] == mt]["Sample ID"])) / len(set(tp53bp1["Sample
ID"])) * 100

```

```

z = float("{:.2f}".format(z))
rankmt.append((mt, z))
rankmt = sorted(rankmt, key=lambda x: x[1], reverse=True)

# Calculate the proportion of TP53BP1-affected patients harboring nonsense or
# frameshift deletion.
sids = []
for selmt in [rankmt[0][0], rankmt[1][0]]:
    sids = sids + list(tp53bp1[tp53bp1["Mutation Type"] == selmt]["Sample ID"])
x = len(set(sids)) / len(set(tp53bp1["Sample ID"])) * 100
x = float("{:.2f}".format(x))

```

Splicing pathway. Depending on the gene case, make the appropriate calculations needed for the paper.

```

import os
os.chdir("~\\python programming\\3")

import pandas as pd
from collections import Counter
import re

data =
pd.read_csv("driver_mutations_for_204_cancer_genes_includes_pathways_new_dataset_primary_t
umors.csv", index_col=0)

# Isolate mutation registries referring to HDR pathways' genes (some
# genes also participate in other pathways).
inds = []
for i in data.index:
    if "Spliceosome" in data.iloc[i].Pathways:
        inds.append(i)
part = data.iloc[inds].reset_index().drop(columns="index")

# SPEN's RESULTS MANAGEMENT
spen = part[part.Gene == "SPEN"].reset_index().drop(columns="index")
pch = Counter(spen["Protein Change"]).most_common()
ch, fr = zip(*pch)

# Sort protein changes of SPEN by their occurrence rate
rank = []
for mut in ch:
    indices = []
    for i in spen.index:
        if spen.iloc[i]["Protein Change"] == mut:
            indices.append(i)
    p = len(set(spen.iloc[indices]["Sample ID"])) / len(set(spen["Sample ID"])) * 100
    p = float("{:.2f}".format(p))
    rank.append((mut, p))
rank = sorted(rank, key = lambda x : x[1], reverse=True)

```

```

# Find the most frequent Mutation Type in SPEN gene. (We have checked that each
# mutation belongs only to one Mutation Type). Due to the presence of more than
# one mutations in SPEN gene in some patients, the sum of the percentages calculated
# here may exceed 100 %.
rankmt = []
for mt in list(set(spen["Mutation Type"])):
    z = len(set(spen[spen["Mutation Type"] == mt]["Sample ID"])) / len(set(spen["Sample ID"])) *
100
    z = float("{:.2f}".format(z))
    rankmt.append((mt, z))
rankmt = sorted(rankmt, key=lambda x: x[1], reverse=True)

```

```

# Calculate the proportion of SPEN-affected patients harboring nonsense or
# frameshift deletion.
sids = []
for selmt in [rankmt[0][0], rankmt[1][0]]:
    sids = sids + list(spen[spen["Mutation Type"] == selmt]["Sample ID"])
x = len(set(sids)) / len(set(spen["Sample ID"])) * 100
x = float("{:.2f}".format(x))

```

```

# CDK12's RESULTS MANAGEMENT
cdk12 = part[part.Gene == "CDK12"].reset_index().drop(columns="index")
pch = Counter(cdk12["Protein Change"]).most_common()
ch, fr = zip(*pch)

```

```

# Sort protein changes of CDK12 by their occurrence rate
rank = []
for mut in ch:
    indices = []
    for i in cdk12.index:
        if cdk12.iloc[i]["Protein Change"] == mut:
            indices.append(i)
    p = len(set(cdk12.iloc[indices]["Sample ID"])) / len(set(cdk12["Sample ID"])) * 100
    p = float("{:.2f}".format(p))
    rank.append((mut, p))
rank = sorted(rank, key = lambda x : x[1], reverse=True)

```

```

# Find the most frequent Mutation Type in CDK12 gene. (We have checked that each
# mutation belongs only to one Mutation Type). Due to the presence of more than
# one mutations in CDK12 gene in some patients, the sum of the percentages calculated
# here may exceed 100 %.
rankmt = []
for mt in list(set(cdk12["Mutation Type"])):
    z = len(set(cdk12[cdk12["Mutation Type"] == mt]["Sample ID"])) / len(set(cdk12["Sample
ID"])) * 100
    z = float("{:.2f}".format(z))
    rankmt.append((mt, z))
rankmt = sorted(rankmt, key=lambda x: x[1], reverse=True)

```

```

# Calculate the proportion of CDK12-affected patients harboring mutation of
# one of the 3 most frequent mutation types of this gene (fusion, frameshift
# deletion or nonsense mutation).

```

```

sids = []
for i in range(3):
    sids = sids + list(cdk12[cdk12["Mutation Type"] == rankmt[i][0]]["Sample ID"])
x = len(set(sids)) / len(set(cdk12["Sample ID"])) * 100
x = float("{:.2f}".format(x))

# FUBP1's RESULTS MANAGEMENT
fubp1 = part[part.Gene == "FUBP1"].reset_index().drop(columns="index")
pch = Counter(fubp1["Protein Change"]).most_common()
ch, fr = zip(*pch)

# Sort protein changes of FUBP1 by their occurrence rate
rank = []
for mut in ch:
    indices = []
    for i in fubp1.index:
        if fubp1.iloc[i]["Protein Change"] == mut:
            indices.append(i)
    p = len(set(fubp1.iloc[indices]["Sample ID"])) / len(set(fubp1["Sample ID"])) * 100
    p = float("{:.2f}".format(p))
    rank.append((mut, p))
rank = sorted(rank, key = lambda x : x[1], reverse=True)

# Find the most frequent Mutation Type in FUBP1 gene. (We have checked that each
# mutation belongs only to one Mutation Type). Due to the presence of more than
# one mutations in FUBP1 gene in some patients, the sum of the percentages calculated
# here may exceed 100 %.
rankmt = []
for mt in list(set(fubp1["Mutation Type"])):
    z = len(set(fubp1[fubp1["Mutation Type"] == mt]["Sample ID"])) / len(set(fubp1["Sample ID"]))
    * 100
    z = float("{:.2f}".format(z))
    rankmt.append((mt, z))
rankmt = sorted(rankmt, key=lambda x: x[1], reverse=True)

# Find all non-rearrangement (non-fusion) positions of FUBP1 gene. Fusion names
# are the only ones including a "-" in them. We exclude them because we want to
# rank specific mutational positions for their alteration rate (fusion names
# just include the implicated gene names).
positions = []
for pc in ch:
    if "-" not in pc:
        if re.findall("[0-9]+", pc)[0] not in positions:
            positions.append(re.findall("[0-9]+", pc)[0])

# Calculate the proportion of samples bearing FUBP1 mutations at each of the above
# positions.
rankpos = []
unique = []
for pos in positions:
    sids = []
    # We have to avoid overlapped counting. For example, when counting Sample IDs

```

```

# harboring substitutions at position 33, we don't want to include Sample IDs
# that harbor substitution at position 335 (which includes term 33).
for i in fubp1.index:
    if "-" in fubp1.iloc[i]["Protein Change"]:
        continue
    else:
        if int(pos) == int(re.findall("[0-9]+", fubp1.iloc[i]["Protein Change"])[0]):
            sids.append(fubp1.iloc[i]["Sample ID"])
p = len(set(sids)) / len(set(fubp1["Sample ID"])) * 100
p = float("{:.2f}".format(p))
rankpos.append((pos, p))
rankpos = sorted(rankpos, key= lambda x : x[1], reverse=True)

# Find all the different missense mutations of FUBP1 gene. We found that among
# the 96 FUBP1-affected patients, the only missense mutation was R340C !
set(fubp1[fubp1["Mutation Type"] == "Missense_Mutation"]["Protein Change"])
len(set(fubp1["Sample ID"]))

```

## DISCUSSION

```

import os
os.chdir("~/python programming\\3")
import pandas as pd

data =
pd.read_csv("driver_mutations_for_204_cancer_genes_includes_pathways_new_dataset_primary_t
umors.csv", index_col=0)
combinations = []
sids = list(set(data[data["Cancer Type"] == "Mucinous Adenocarcinoma of the Colon and
Rectum"]["Sample ID"]))
for sid in sids:
    # Create a string containing all the pathways where the altered genes
    # of each patient participate in.
    paths = []
    for pathlab in list(set(data[data["Sample ID"] == sid]["Pathways"])):
        for part in pathlab.split(" "):
            if part not in paths:
                paths.append(part)
    paths.sort()
    paths = " ".join(paths)
    combinations.append(paths)
Counter(combinations).most_common()

# Check how many of the 55 Mucinous Adenocarcinoma of the Colon and Rectum
# patients, harbor driver somatic alterations in the three most frequently
# mutated pathways of this cancer type simultaneously !
c = 0
for comb in combinations:

```



```
if "RTK_RAS" in comb and "b_catenin_Wnt" in comb and "Lipid" in comb:  
    c += 1
```

```
import os  
os.chdir("~\\python programming\\3")  
import pandas as pd  
from collections import Counter
```

```
data =  
pd.read_csv("driver_mutations_for_204_cancer_genes_includes_pathways_new_dataset_primary_t  
umors.csv", index_col=0)  
g = data[data.Gene == "CDKN1A"]
```

```
# Check how often Q10* and M38Nfs*10 happen in each cancer type (we are  
# particularly interested in Bladder Urothelial Carcinoma)  
Counter(list(g[g["Protein Change"] == "Q10*"]["Cancer Type"])).most_common()  
Counter(list(g[g["Protein Change"] == "M38Nfs*10"]["Cancer Type"])).most_common()
```

```
fubp1 = data[data.Gene == "FUBP1"]  
# Calculate the proportion of FUBP1-affected patients harboring at least one of  
# the following mutations: S11Lfs*43, R430C, I301Yfs*22, I301Nfs*22 and I301Nfs*4  
sids = []  
for i in ["S11Lfs*43", "R430C", "I301Yfs*22", "I301Nfs*22", "I301Nfs*4"]:  
    sids = sids + list(fubp1[fubp1["Protein Change"] == i]["Sample ID"])  
x = len(set(sids)) / len(set(fubp1["Sample ID"])) * 100  
x = float("{:.2f}".format(x))
```

```
import os  
os.chdir("~\\python programming\\3")  
import pandas as pd
```

```
data =  
pd.read_csv("driver_mutations_for_204_cancer_genes_includes_pathways_new_dataset_primary_t  
umors.csv", index_col=0)
```

```
sids = list(set(data[data.Gene == "TP53BP1"]["Sample ID"]))  
mutexc = 0  
# Check the TP53BP1-affected patients for mutual exclusivity between TP53BP1  
# and BRCA1/2 driver mutations.  
for s in sids:  
    x = set(data[data["Sample ID"] == s].Gene)  
    if "BRCA2" not in x and "BRCA1" not in x:  
        mutexc += 1  
p = mutexc / len(sids) * 100
```
